# Supplementary material for: Fire Blight Susceptibility in Lilium spp. Correlates to Sensitivity to Botrytis elliptica Secreted Cell Death Inducing Compounds
Source: Frontiers journal article supplement (doi:10.3389/fpls.2021.660337), 2021-06-28
Supplement: Data_Sheet_1.zip [file Data_Sheet_1.zip]

## Sheet: AM19
section	be	leaf	dpi	spot	ls
A 1	9610	1	4	1	9.4
A 1	9610	1	4	2	12.09
A 1	9610	1	4	3	7.24
A 1	9610	1	4	4	11.27
A 1	9610	2	4	1	11.29
A 1	9610	2	4	2	7.46
A 1	9610	2	4	3	7.35
A 1	9610	2	4	4	6.97
A 1	9610	3	4	1	9.18
A 1	9610	3	4	2	9.61
A 1	9610	3	4	3	8.66
A 1	9610	3	4	4	11.66
A 1	9612	1	4	1	2.39
A 1	9612	1	4	2	4.02
A 1	9612	1	4	3	3.68
A 1	9612	1	4	4	4.07
A 1	9612	2	4	1	3.72
A 1	9612	2	4	2	3.48
A 1	9612	2	4	3	2.87
A 1	9612	2	4	4	2.47
A 1	9612	3	4	1	4.57
A 1	9612	3	4	2	6.7
A 1	9612	3	4	3	5.16
A 1	9612	3	4	4	1.89
A 1	9605	1	4	1	10.14
A 1	9605	1	4	2	8.61
A 1	9605	1	4	3	11.07
A 1	9605	1	4	4	9.78
A 1	9605	2	4	1	13.02
A 1	9605	2	4	2	11.59
A 1	9605	2	4	3	13.01
A 1	9605	2	4	4	12.41
A 1	9605	3	4	1	6.6
A 1	9605	3	4	2	8.07
A 1	9605	3	4	3	10.4
A 1	9605	3	4	4	9.1
A 1	748	1	4	1	7.06
A 1	748	1	4	2	6.7
A 1	748	1	4	3	6.34
A 1	748	1	4	4	7.42
A 1	748	2	4	1	9.92
A 1	748	2	4	2	8.8
A 1	748	2	4	3	8.04
A 1	748	2	4	4	7.99
A 1	748	3	4	1	5.73
A 1	748	3	4	2	5.99
A 1	748	3	4	3	5.52
A 1	748	3	4	4	6.6
A 1	9401	1	4	1	20
A 1	9401	1	4	2	23.4
A 1	9401	1	4	3	24
A 1	9401	1	4	4	22.9
A 1	9401	2	4	1	21.3
A 1	9401	2	4	2	23.8
A 1	9401	2	4	3	20.7
A 1	9401	2	4	4	21.7
A 1	9401	3	4	1	22
A 1	9401	3	4	2	21
A 1	9401	3	4	3	22.6
A 1	9401	3	4	4	21.5
A 1	9174	1	4	1	6.9
A 1	9174	1	4	2	6.71
A 1	9174	1	4	3	5.3
A 1	9174	1	4	4	5.13
A 1	9174	2	4	1	9.8
A 1	9174	2	4	2	6.14
A 1	9174	2	4	3	6.18
A 1	9174	2	4	4	5.26
A 1	9174	3	4	1	6.96
A 1	9174	3	4	2	6.84
A 1	9174	3	4	3	6.32
A 1	9174	3	4	4	11.9
A 1	9732	1	4	1	2.06
A 1	9732	1	4	2	2.27
A 1	9732	1	4	3	3.12
A 1	9732	1	4	4	1.71
A 1	9732	2	4	1	4.45
A 1	9732	2	4	2	5.83
A 1	9732	2	4	3	5.45
A 1	9732	2	4	4	4.95
A 1	9732	3	4	1	3.31
A 1	9732	3	4	2	4.63
A 1	9732	3	4	3	6.21
A 1	9732	3	4	4	2.96
A 1	9714	1	4	1	7.87
A 1	9714	1	4	2	11.79
A 1	9714	1	4	3	7
A 1	9714	1	4	4	9.25
A 1	9714	2	4	1	8.23
A 1	9714	2	4	2	7.03
A 1	9714	2	4	3	7.04
A 1	9714	2	4	4	6.3
A 1	9714	3	4	1	5.6
A 1	9714	3	4	2	0
A 1	9714	3	4	3	8.59
A 1	9714	3	4	4	3.79
A 1	0006	1	4	1	22.7
A 1	0006	1	4	2	21.81
A 1	0006	1	4	3	20.91
A 1	0006	1	4	4	22.95
A 1	0006	2	4	1	21.43
A 1	0006	2	4	2	20.2
A 1	0006	2	4	3	23.5
A 1	0006	2	4	4	26.45
A 1	0006	3	4	1	20.07
A 1	0006	3	4	2	22.78
A 1	0006	3	4	3	20.04
A1	0006	3	4	4	25.75
A 1	254-2	1	4	1	14.7
A 1	254-2	1	4	2	5.8
A 1	254-2	1	4	3	11.8
A 1	254-2	1	4	4	0
A 1	254-2	2	4	1	0
A 1	254-2	2	4	2	13.94
A 1	254-2	2	4	3	11.51
A 1	254-2	2	4	4	0
A 1	254-2	3	4	1	13.82
A 1	254-2	3	4	2	0
A 1	254-2	3	4	3	13.39
A 1	254-2	3	4	4	16.55
A 1	254-8	1	4	1	16.37
A 1	254-8	1	4	2	13.55
A 1	254-8	1	4	3	14.14
A 1	254-8	1	4	4	14.7
A 1	254-8	2	4	1	12.3
A 1	254-8	2	4	2	16.8
A 1	254-8	2	4	3	11.3
A 1	254-8	2	4	4	11.56
A 1	254-8	3	4	1	12.6
A 1	254-8	3	4	2	11.2
A 1	254-8	3	4	3	14.12
A 1	254-8	3	4	4	14.96
A 1	254-11	1	4	1	16.4
A 1	254-11	1	4	2	14.2
A 1	254-11	1	4	3	16.27
A 1	254-11	1	4	4	19.04
A 1	254-11	2	4	1	15
A 1	254-11	2	4	2	13.76
A 1	254-11	2	4	3	13
A 1	254-11	2	4	4	15.34
A 1	254-11	3	4	1	16.22
A 1	254-11	3	4	2	14.82
A 1	254-11	3	4	3	12.8
A 1	254-11	3	4	4	14.85
A 2	9610	1	4	1	1.68
A 2	9610	1	4	2	2.56
A 2	9610	1	4	3	2.89
A 2	9610	1	4	4	2.45
A 2	9610	2	4	1	2.94
A 2	9610	2	4	2	2.76
A 2	9610	2	4	3	2.6
A 2	9610	2	4	4	2.66
A 2	9610	3	4	1	2.16
A 2	9610	3	4	2	2.8
A 2	9610	3	4	3	2.48
A 2	9610	3	4	4	2.34
A 2	9612	1	4	1	1.15
A 2	9612	1	4	2	0
A 2	9612	1	4	3	2.46
A 2	9612	1	4	4	0
A 2	9612	2	4	1	0
A 2	9612	2	4	2	2.65
A 2	9612	2	4	3	0
A 2	9612	2	4	4	0
A 2	9612	3	4	1	0
A 2	9612	3	4	2	1.97
A 2	9612	3	4	3	4.43
A 2	9612	3	4	4	2.46
A 2	9605	1	4	1	11.7
A 2	9605	1	4	2	6.97
A 2	9605	1	4	3	7.19
A 2	9605	1	4	4	5.2
A 2	9605	2	4	1	8.65
A 2	9605	2	4	2	9.75
A 2	9605	2	4	3	9.33
A 2	9605	2	4	4	6.2
A 2	9605	3	4	1	11.5
A 2	9605	3	4	2	6.7
A 2	9605	3	4	3	7.4
A 2	9605	3	4	4	7.58
A 2	748	1	4	1	1.73
A 2	748	1	4	2	2.85
A 2	748	1	4	3	2.63
A 2	748	1	4	4	1.98
A 2	748	2	4	1	0
A 2	748	2	4	2	2.58
A 2	748	2	4	3	2.27
A 2	748	2	4	4	2.93
A 2	748	3	4	1	2.14
A 2	748	3	4	2	1.6
A 2	748	3	4	3	3.64
A 2	748	3	4	4	4.75
A 2	9401	1	4	1	4.59
A 2	9401	1	4	2	19
A 2	9401	1	4	3	18.7
A 2	9401	1	4	4	6.16
A 2	9401	2	4	1	4.26
A 2	9401	2	4	2	2.65
A 2	9401	2	4	3	3.87
A 2	9401	2	4	4	6.14
A 2	9401	3	4	1	11.29
A 2	9401	3	4	2	11
A 2	9401	3	4	3	13.76
A 2	9401	3	4	4	9.61
A 2	9174	1	4	1	4.95
A 2	9174	1	4	2	4.32
A 2	9174	1	4	3	4.5
A 2	9174	1	4	4	3.09
A 2	9174	2	4	1	4.23
A 2	9174	2	4	2	3.91
A 2	9174	2	4	3	2.97
A 2	9174	2	4	4	3.7
A 2	9174	3	4	1	2.63
A 2	9174	3	4	2	2.58
A 2	9174	3	4	3	3.64
A 2	9174	3	4	4	3.34
A 2	9732	1	4	1	2.08
A 2	9732	1	4	2	2.7
A 2	9732	1	4	3	2.17
A 2	9732	1	4	4	2.18
A 2	9732	2	4	1	2.55
A 2	9732	2	4	2	2.34
A 2	9732	2	4	3	2.58
A 2	9732	2	4	4	1.53
A 2	9732	3	4	1	2.11
A 2	9732	3	4	2	1.7
A 2	9732	3	4	3	2.05
A 2	9732	3	4	4	1.55
A 2	9714	1	4	1	1.94
A 2	9714	1	4	2	2.49
A 2	9714	1	4	3	2.16
A 2	9714	1	4	4	9.85
A 2	9714	2	4	1	0
A 2	9714	2	4	2	9.91
A 2	9714	2	4	3	10.64
A 2	9714	2	4	4	6.43
A 2	9714	3	4	1	1.58
A 2	9714	3	4	2	8.5
A 2	9714	3	4	3	0
A 2	9714	3	4	4	1.83
A 2	0006	1	4	1	21.12
A 2	0006	1	4	2	9.42
A 2	0006	1	4	3	21.06
A 2	0006	1	4	4	15.5
A 2	0006	2	4	1	15.8
A 2	0006	2	4	2	27.5
A 2	0006	2	4	3	14.4
A 2	0006	2	4	4	22
A 2	0006	3	4	1	16.7
A 2	0006	3	4	2	14.18
A 2	0006	3	4	3	17.61
A 2	0006	3	4	4	18.23
A 2	254-2	1	4	1	8
A 2	254-2	1	4	2	7.6
A 2	254-2	1	4	3	0
A 2	254-2	1	4	4	5.57
A 2	254-2	2	4	1	6.78
A 2	254-2	2	4	2	7.89
A 2	254-2	2	4	3	0
A 2	254-2	2	4	4	0
A 2	254-2	3	4	1	11.5
A 2	254-2	3	4	2	9.71
A 2	254-2	3	4	3	10.94
A 2	254-2	3	4	4	0
A 2	254-8	1	4	1	15.24
A 2	254-8	1	4	2	17.81
A 2	254-8	1	4	3	12.66
A 2	254-8	1	4	4	11.29
A 2	254-8	2	4	1	17.9
A 2	254-8	2	4	2	16.55
A 2	254-8	2	4	3	9.94
A 2	254-8	2	4	4	11.44
A 2	254-8	3	4	1	6.09
A 2	254-8	3	4	2	6.91
A 2	254-8	3	4	3	10.69
A 2	254-8	3	4	4	8.63
A 2	254-11	1	4	1	14.77
A 2	254-11	1	4	2	12.31
A 2	254-11	1	4	3	14.39
A 2	254-11	1	4	4	13.78
A 2	254-11	2	4	1	12.99
A 2	254-11	2	4	2	11.94
A 2	254-11	2	4	3	10.95
A 2	254-11	2	4	4	13.88
A 2	254-11	3	4	1	12.45
A 2	254-11	3	4	2	13.86
A 2	254-11	3	4	3	12.6
A 2	254-11	3	4	4	14.13
A 3	9610	1	4	1	2.6
A 3	9610	1	4	2	3.6
A 3	9610	1	4	3	4.9
A 3	9610	1	4	4	4.93
A 3	9610	2	4	1	4.83
A 3	9610	2	4	2	2.85
A 3	9610	2	4	3	5.14
A 3	9610	2	4	4	3.81
A 3	9610	3	4	1	6.08
A 3	9610	3	4	2	7.53
A 3	9610	3	4	3	6.01
A 3	9610	3	4	4	2.5
A 3	9612	1	4	1	0
A 3	9612	1	4	2	4.2
A 3	9612	1	4	3	7.12
A 3	9612	1	4	4	3.93
A 3	9612	2	4	1	4
A 3	9612	2	4	2	4.7
A 3	9612	2	4	3	2
A 3	9612	2	4	4	3.23
A 3	9612	3	4	1	2.94
A 3	9612	3	4	2	2.1
A 3	9612	3	4	3	2.72
A 3	9612	3	4	4	3.74
A 3	9605	1	4	1	5.32
A 3	9605	1	4	2	5.52
A 3	9605	1	4	3	9
A 3	9605	1	4	4	4.33
A 3	9605	2	4	1	3.95
A 3	9605	2	4	2	8.06
A 3	9605	2	4	3	5.74
A 3	9605	2	4	4	2.96
A 3	9605	3	4	1	2.69
A 3	9605	3	4	2	4.77
A 3	9605	3	4	3	3.29
A 3	9605	3	4	4	6.12
A 3	748	1	4	1	6.76
A 3	748	1	4	2	5.27
A 3	748	1	4	3	6.42
A 3	748	1	4	4	6.2
A 3	748	2	4	1	7.13
A 3	748	2	4	2	7.22
A 3	748	2	4	3	7.15
A 3	748	2	4	4	5.71
A 3	748	3	4	1	6.57
A 3	748	3	4	2	4.31
A 3	748	3	4	3	4.82
A 3	748	3	4	4	5.82
A 3	9401	1	4	1	6.9
A 3	9401	1	4	2	14.27
A 3	9401	1	4	3	3.23
A 3	9401	1	4	4	20.7
A 3	9401	2	4	1	11.5
A 3	9401	2	4	2	13.1
A 3	9401	2	4	3	11.45
A 3	9401	2	4	4	2.9
A 3	9401	3	4	1	4.25
A 3	9401	3	4	2	8.74
A 3	9401	3	4	3	7.12
A 3	9401	3	4	4	5.98
A 3	9174	1	4	1	3.97
A 3	9174	1	4	2	5.83
A 3	9174	1	4	3	11.12
A 3	9174	1	4	4	1.9
A 3	9174	2	4	1	3.05
A 3	9174	2	4	2	2.61
A 3	9174	2	4	3	4.09
A 3	9174	2	4	4	3.24
A 3	9174	3	4	1	3.97
A 3	9174	3	4	2	3.24
A 3	9174	3	4	3	4.69
A 3	9174	3	4	4	5.55
A 3	9732	1	4	1	3.34
A 3	9732	1	4	2	3.58
A 3	9732	1	4	3	4.27
A 3	9732	1	4	4	3.45
A 3	9732	2	4	1	0
A 3	9732	2	4	2	4.73
A 3	9732	2	4	3	0
A 3	9732	2	4	4	2.87
A 3	9732	3	4	1	5.94
A 3	9732	3	4	2	3.12
A 3	9732	3	4	3	5.83
A 3	9732	3	4	4	4.51
A 3	9714	1	4	1	5.73
A 3	9714	1	4	2	0
A 3	9714	1	4	3	3.34
A 3	9714	1	4	4	0
A 3	9714	2	4	1	5.35
A 3	9714	2	4	2	3.6
A 3	9714	2	4	3	3.7
A 3	9714	2	4	4	4.4
A 3	9714	3	4	1	1.8
A 3	9714	3	4	2	1.9
A 3	9714	3	4	3	9.44
A 3	9714	3	4	4	4.76
A 3	0006	1	4	1	14.08
A 3	0006	1	4	2	13.23
A 3	0006	1	4	3	13.95
A 3	0006	1	4	4	15.16
A 3	0006	2	4	1	14.82
A 3	0006	2	4	2	16.9
A 3	0006	2	4	3	15.87
A 3	0006	2	4	4	14.71
A 3	0006	3	4	1	13.3
A 3	0006	3	4	2	14.48
A 3	0006	3	4	3	14.72
A 3	0006	3	4	4	14.24
A 3	254-2	1	4	1	15
A 3	254-2	1	4	2	0
A 3	254-2	1	4	3	10.23
A 3	254-2	1	4	4	12.6
A 3	254-2	2	4	1	13.26
A 3	254-2	2	4	2	4.36
A 3	254-2	2	4	3	6.87
A 3	254-2	2	4	4	5.63
A 3	254-2	3	4	1	5.47
A 3	254-2	3	4	2	9.11
A 3	254-2	3	4	3	6.75
A 3	254-2	3	4	4	8.54
A 3	254-8	1	4	1	13.4
A 3	254-8	1	4	2	13.9
A 3	254-8	1	4	3	13
A 3	254-8	1	4	4	13.7
A 3	254-8	2	4	1	12.6
A 3	254-8	2	4	2	11.8
A 3	254-8	2	4	3	12.3
A 3	254-8	2	4	4	12.8
A 3	254-8	3	4	1	13.3
A 3	254-8	3	4	2	13.9
A 3	254-8	3	4	3	12.8
A 3	254-8	3	4	4	13.45
A 3	254-11	1	4	1	13.94
A 3	254-11	1	4	2	14.98
A 3	254-11	1	4	3	12.42
A 3	254-11	1	4	4	13.82
A 3	254-11	2	4	1	12.81
A 3	254-11	2	4	2	13.54
A 3	254-11	2	4	3	12.38
A 3	254-11	2	4	4	13.02
A 3	254-11	3	4	1	13.6
A 3	254-11	3	4	2	12.58
A 3	254-11	3	4	3	15.14
A 3	254-11	3	4	4	14.16
LA 3	9610	1	4	1	3.52
LA 3	9610	1	4	2	2.31
LA 3	9610	1	4	3	1.65
LA 3	9610	1	4	4	3.64
LA 3	9610	2	4	1	2.07
LA 3	9610	2	4	2	5.08
LA 3	9610	2	4	3	4.94
LA 3	9610	2	4	4	3.13
LA 3	9610	3	4	1	3.25
LA 3	9610	3	4	2	3.65
LA 3	9610	3	4	3	2.18
LA 3	9610	3	4	4	3.16
LA 3	9612	1	4	1	0
LA 3	9612	1	4	2	7.73
LA 3	9612	1	4	3	5
LA 3	9612	1	4	4	4.54
LA 3	9612	2	4	1	4.12
LA 3	9612	2	4	2	3.37
LA 3	9612	2	4	3	2.23
LA 3	9612	2	4	4	1.43
LA 3	9612	3	4	1	2.32
LA 3	9612	3	4	2	0
LA 3	9612	3	4	3	0
LA 3	9612	3	4	4	0
LA 3	9605	1	4	1	6.35
LA 3	9605	1	4	2	2.38
LA 3	9605	1	4	3	4.4
LA 3	9605	1	4	4	9.04
LA 3	9605	2	4	1	6.24
LA 3	9605	2	4	2	6.03
LA 3	9605	2	4	3	9.55
LA 3	9605	2	4	4	4.93
LA 3	9605	3	4	1	5.79
LA 3	9605	3	4	2	5.07
LA 3	9605	3	4	3	3.03
LA 3	9605	3	4	4	6.91
LA 3	748	1	4	1	5.7
LA 3	748	1	4	2	7.22
LA 3	748	1	4	3	0
LA 3	748	1	4	4	5.58
LA 3	748	2	4	1	6.18
LA 3	748	2	4	2	8.28
LA 3	748	2	4	3	6.8
LA 3	748	2	4	4	3.72
LA 3	748	3	4	1	2.43
LA 3	748	3	4	2	4.98
LA 3	748	3	4	3	7.27
LA 3	748	3	4	4	6.74
LA 3	9401	1	4	1	11.64
LA 3	9401	1	4	2	12.61
LA 3	9401	1	4	3	11.58
LA 3	9401	1	4	4	12.75
LA 3	9401	2	4	1	13.93
LA 3	9401	2	4	2	9.9
LA 3	9401	2	4	3	13.89
LA 3	9401	2	4	4	16.25
LA 3	9401	3	4	1	14.17
LA 3	9401	3	4	2	14.05
LA 3	9401	3	4	3	13.75
LA 3	9401	3	4	4	14.83
LA 3	9174	1	4	1	6.33
LA 3	9174	1	4	2	5.64
LA 3	9174	1	4	3	6.17
LA 3	9174	1	4	4	4.7
LA 3	9174	2	4	1	5.13
LA 3	9174	2	4	2	5.55
LA 3	9174	2	4	3	5.36
LA 3	9174	2	4	4	4.87
LA 3	9174	3	4	1	4.74
LA 3	9174	3	4	2	4.93
LA 3	9174	3	4	3	4.65
LA 3	9174	3	4	4	4.81
LA 3	9732	1	4	1	0
LA 3	9732	1	4	2	5.38
LA 3	9732	1	4	3	1.61
LA 3	9732	1	4	4	0
LA 3	9732	2	4	1	2.35
LA 3	9732	2	4	2	3
LA 3	9732	2	4	3	1.8
LA 3	9732	2	4	4	3.31
LA 3	9732	3	4	1	1.3
LA 3	9732	3	4	2	3.82
LA 3	9732	3	4	3	2.86
LA 3	9732	3	4	4	3.45
LA 3	9714	1	4	1	0
LA 3	9714	1	4	2	6.27
LA 3	9714	1	4	3	4.79
LA 3	9714	1	4	4	0
LA 3	9714	2	4	1	3.51
LA 3	9714	2	4	2	3.43
LA 3	9714	2	4	3	3.97
LA 3	9714	2	4	4	4.13
LA 3	9714	3	4	1	3.12
LA 3	9714	3	4	2	6.31
LA 3	9714	3	4	3	4.25
LA 3	9714	3	4	4	0
LA 3	0006	1	4	1	10.91
LA 3	0006	1	4	2	7.63
LA 3	0006	1	4	3	6.26
LA 3	0006	1	4	4	10.85
LA 3	0006	2	4	1	8.74
LA 3	0006	2	4	2	12.6
LA 3	0006	2	4	3	5.36
LA 3	0006	2	4	4	6.45
LA 3	0006	3	4	1	9.9
LA 3	0006	3	4	2	5.75
LA 3	0006	3	4	3	7.89
LA 3	0006	3	4	4	10.62
LA 3	254-2	1	4	1	1.16
LA 3	254-2	1	4	2	3.81
LA 3	254-2	1	4	3	1.8
LA 3	254-2	1	4	4	3.03
LA 3	254-2	2	4	1	4.48
LA 3	254-2	2	4	2	3.04
LA 3	254-2	2	4	3	2.05
LA 3	254-2	2	4	4	4.43
LA 3	254-2	3	4	1	2.14
LA 3	254-2	3	4	2	4.38
LA 3	254-2	3	4	3	7.28
LA 3	254-2	3	4	4	3.06
LA 3	254-8	1	4	1	9.8
LA 3	254-8	1	4	2	11.47
LA 3	254-8	1	4	3	10.25
LA 3	254-8	1	4	4	10.64
LA 3	254-8	2	4	1	9.41
LA 3	254-8	2	4	2	9.35
LA 3	254-8	2	4	3	8.38
LA 3	254-8	2	4	4	9.27
LA 3	254-8	3	4	1	9.27
LA 3	254-8	3	4	2	9.04
LA 3	254-8	3	4	3	9.28
LA 3	254-8	3	4	4	9.17
LA 3	254-11	1	4	1	4.74
LA 3	254-11	1	4	2	8.06
LA 3	254-11	1	4	3	8.37
LA 3	254-11	1	4	4	4.08
LA 3	254-11	2	4	1	4.39
LA 3	254-11	2	4	2	8.67
LA 3	254-11	2	4	3	5.13
LA 3	254-11	2	4	4	3.8
LA 3	254-11	3	4	1	5.82
LA 3	254-11	3	4	2	9.64
LA 3	254-11	3	4	3	8.45
LA 3	254-11	3	4	4	9.09
LA 1	9610	1	4	1	2.39
LA 1	9610	1	4	2	3.04
LA 1	9610	1	4	3	1.26
LA 1	9610	1	4	4	3.05
LA 1	9610	2	4	1	1.92
LA 1	9610	2	4	2	2.55
LA 1	9610	2	4	3	3.95
LA 1	9610	2	4	4	2.21
LA 1	9610	3	4	1	2.33
LA 1	9610	3	4	2	1.2
LA 1	9610	3	4	3	1.7
LA 1	9610	3	4	4	1.18
LA 1	9612	1	4	1	2.87
LA 1	9612	1	4	2	2.32
LA 1	9612	1	4	3	3.11
LA 1	9612	1	4	4	2.76
LA 1	9612	2	4	1	4.8
LA 1	9612	2	4	2	1.67
LA 1	9612	2	4	3	3.57
LA 1	9612	2	4	4	2.46
LA 1	9612	3	4	1	2.49
LA 1	9612	3	4	2	1.11
LA 1	9612	3	4	3	3.13
LA 1	9612	3	4	4	3.55
LA 1	9605	1	4	1	6.62
LA 1	9605	1	4	2	7.88
LA 1	9605	1	4	3	6.81
LA 1	9605	1	4	4	2.95
LA 1	9605	2	4	1	10
LA 1	9605	2	4	2	3.3
LA 1	9605	2	4	3	11.3
LA 1	9605	2	4	4	15.45
LA 1	9605	3	4	1	6.79
LA 1	9605	3	4	2	6.26
LA 1	9605	3	4	3	2.85
LA 1	9605	3	4	4	10.8
LA 1	748	1	4	1	3.47
LA 1	748	1	4	2	3.92
LA 1	748	1	4	3	3.74
LA 1	748	1	4	4	3.36
LA 1	748	2	4	1	3.26
LA 1	748	2	4	2	3.72
LA 1	748	2	4	3	4.08
LA 1	748	2	4	4	4.3
LA 1	748	3	4	1	5.03
LA 1	748	3	4	2	4.04
LA 1	748	3	4	3	3.52
LA 1	748	3	4	4	4.96
LA 1	9401	1	4	1	13.4
LA 1	9401	1	4	2	16.5
LA 1	9401	1	4	3	19.3
LA 1	9401	1	4	4	15.3
LA 1	9401	2	4	1	15
LA 1	9401	2	4	2	18.6
LA 1	9401	2	4	3	12.36
LA 1	9401	2	4	4	12.47
LA 1	9401	3	4	1	16.7
LA 1	9401	3	4	2	13.92
LA 1	9401	3	4	3	13.84
LA 1	9401	3	4	4	14.76
LA 1	9174	1	4	1	9.81
LA 1	9174	1	4	2	8.28
LA 1	9174	1	4	3	10.12
LA 1	9174	1	4	4	10.36
LA 1	9174	2	4	1	12.93
LA 1	9174	2	4	2	10.17
LA 1	9174	2	4	3	12.25
LA 1	9174	2	4	4	12.34
LA 1	9174	3	4	1	11.79
LA 1	9174	3	4	2	11.45
LA 1	9174	3	4	3	13.02
LA 1	9174	3	4	4	11.06
LA 1	9732	1	4	1	3.94
LA 1	9732	1	4	2	2.94
LA 1	9732	1	4	3	2.11
LA 1	9732	1	4	4	2.69
LA 1	9732	2	4	1	3.56
LA 1	9732	2	4	2	2.5
LA 1	9732	2	4	3	4
LA 1	9732	2	4	4	1.95
LA 1	9732	3	4	1	1.3
LA 1	9732	3	4	2	2.65
LA 1	9732	3	4	3	2.68
LA 1	9732	3	4	4	3.5
LA 1	9714	1	4	1	0
LA 1	9714	1	4	2	0
LA 1	9714	1	4	3	1.5
LA 1	9714	1	4	4	0
LA 1	9714	2	4	1	0
LA 1	9714	2	4	2	1.9
LA 1	9714	2	4	3	4.23
LA 1	9714	2	4	4	3.26
LA 1	9714	3	4	1	0
LA 1	9714	3	4	2	5.31
LA 1	9714	3	4	3	0
LA 1	9714	3	4	4	8.57
LA 1	0006	1	4	1	10.46
LA 1	0006	1	4	2	14.7
LA 1	0006	1	4	3	10
LA 1	0006	1	4	4	8.95
LA 1	0006	2	4	1	8
LA 1	0006	2	4	2	12.6
LA 1	0006	2	4	3	5
LA 1	0006	2	4	4	6.45
LA 1	0006	3	4	1	11.8
LA 1	0006	3	4	2	8
LA 1	0006	3	4	3	7.5
LA 1	0006	3	4	4	10.7
LA 1	254-2	1	4	1	6.88
LA 1	254-2	1	4	2	3.63
LA 1	254-2	1	4	3	6.42
LA 1	254-2	1	4	4	6.28
LA 1	254-2	2	4	1	6.97
LA 1	254-2	2	4	2	6.82
LA 1	254-2	2	4	3	4.62
LA 1	254-2	2	4	4	4.72
LA 1	254-2	3	4	1	9.93
LA 1	254-2	3	4	2	4.7
LA 1	254-2	3	4	3	5.16
LA 1	254-2	3	4	4	5.51
LA 1	254-8	1	4	1	14.56
LA 1	254-8	1	4	2	14.68
LA 1	254-8	1	4	3	15.23
LA 1	254-8	1	4	4	15.74
LA 1	254-8	2	4	1	14.67
LA 1	254-8	2	4	2	16.53
LA 1	254-8	2	4	3	18.62
LA 1	254-8	2	4	4	18.54
LA 1	254-8	3	4	1	18.39
LA 1	254-8	3	4	2	17.24
LA 1	254-8	3	4	3	18.64
LA 1	254-8	3	4	4	17.83
LA 1	254-11	1	4	1	6.67
LA 1	254-11	1	4	2	7.63
LA 1	254-11	1	4	3	8.68
LA 1	254-11	1	4	4	15.29
LA 1	254-11	2	4	1	10.7
LA 1	254-11	2	4	2	5.5
LA 1	254-11	2	4	3	10.45
LA 1	254-11	2	4	4	12.13
LA 1	254-11	3	4	1	9.9
LA 1	254-11	3	4	2	8.4
LA 1	254-11	3	4	3	11.5
LA 1	254-11	3	4	4	6.21
LA 2	9610	1	4	1	8.42
LA 2	9610	1	4	2	7.88
LA 2	9610	1	4	3	6.59
LA 2	9610	1	4	4	7.5
LA 2	9610	2	4	1	3.08
LA 2	9610	2	4	2	4.58
LA 2	9610	2	4	3	8.04
LA 2	9610	2	4	4	4.83
LA 2	9610	3	4	1	1.44
LA 2	9610	3	4	2	4.91
LA 2	9610	3	4	3	3.53
LA 2	9610	3	4	4	3.94
LA 2	9612	1	4	1	0
LA 2	9612	1	4	2	3.43
LA 2	9612	1	4	3	2.93
LA 2	9612	1	4	4	0
LA 2	9612	2	4	1	6.5
LA 2	9612	2	4	2	5
LA 2	9612	2	4	3	3
LA 2	9612	2	4	4	4
LA 2	9612	3	4	1	4.38
LA 2	9612	3	4	2	3.1
LA 2	9612	3	4	3	0
LA 2	9612	3	4	4	4.22
LA 2	9605	1	4	1	6.48
LA 2	9605	1	4	2	7.93
LA 2	9605	1	4	3	6.47
LA 2	9605	1	4	4	8.81
LA 2	9605	2	4	1	6.91
LA 2	9605	2	4	2	7.96
LA 2	9605	2	4	3	7.87
LA 2	9605	2	4	4	7.54
LA 2	9605	3	4	1	3.89
LA 2	9605	3	4	2	3.81
LA 2	9605	3	4	3	4.15
LA 2	9605	3	4	4	4.88
LA 2	748	1	4	1	3.62
LA 2	748	1	4	2	3.65
LA 2	748	1	4	3	4.7
LA 2	748	1	4	4	4.21
LA 2	748	2	4	1	3.97
LA 2	748	2	4	2	4.69
LA 2	748	2	4	3	5
LA 2	748	2	4	4	4.79
LA 2	748	3	4	1	4.75
LA 2	748	3	4	2	5.29
LA 2	748	3	4	3	5.75
LA 2	748	3	4	4	5.84
LA 2	9401	1	4	1	5.45
LA 2	9401	1	4	2	9.6
LA 2	9401	1	4	3	9.43
LA 2	9401	1	4	4	8.26
LA 2	9401	2	4	1	6.17
LA 2	9401	2	4	2	12.8
LA 2	9401	2	4	3	10.63
LA 2	9401	2	4	4	7.95
LA 2	9401	3	4	1	19.32
LA 2	9401	3	4	2	2.58
LA 2	9401	3	4	3	11.16
LA 2	9401	3	4	4	13.28
LA 2	9174	1	4	1	9.52
LA 2	9174	1	4	2	8.67
LA 2	9174	1	4	3	7.14
LA 2	9174	1	4	4	7.65
LA 2	9174	2	4	1	7.12
LA 2	9174	2	4	2	6.98
LA 2	9174	2	4	3	6.34
LA 2	9174	2	4	4	6.73
LA 2	9174	3	4	1	5.98
LA 2	9174	3	4	2	6.38
LA 2	9174	3	4	3	7.09
LA 2	9174	3	4	4	6.97
LA 2	9732	1	4	1	2.05
LA 2	9732	1	4	2	5.23
LA 2	9732	1	4	3	5.69
LA 2	9732	1	4	4	6.41
LA 2	9732	2	4	1	5.79
LA 2	9732	2	4	2	5.74
LA 2	9732	2	4	3	4.85
LA 2	9732	2	4	4	6.25
LA 2	9732	3	4	1	5.31
LA 2	9732	3	4	2	4.43
LA 2	9732	3	4	3	5.13
LA 2	9732	3	4	4	5.6
LA 2	9714	1	4	1	8.41
LA 2	9714	1	4	2	8.6
LA 2	9714	1	4	3	0
LA 2	9714	1	4	4	8.71
LA 2	9714	2	4	1	7.5
LA 2	9714	2	4	2	2
LA 2	9714	2	4	3	7
LA 2	9714	2	4	4	0
LA 2	9714	3	4	1	0
LA 2	9714	3	4	2	3.3
LA 2	9714	3	4	3	11.45
LA 2	9714	3	4	4	0
LA 2	0006	1	4	1	14.8
LA 2	0006	1	4	2	12.9
LA 2	0006	1	4	3	16.6
LA 2	0006	1	4	4	13.7
LA 2	0006	2	4	1	14.5
LA 2	0006	2	4	2	10.5
LA 2	0006	2	4	3	10.6
LA 2	0006	2	4	4	11.31
LA 2	0006	3	4	1	14.1
LA 2	0006	3	4	2	12.2
LA 2	0006	3	4	3	12.8
LA 2	0006	3	4	4	15.67
LA 2	254-2	1	4	1	5.14
LA 2	254-2	1	4	2	7.39
LA 2	254-2	1	4	3	0.76
LA 2	254-2	1	4	4	6.45
LA 2	254-2	2	4	1	4.83
LA 2	254-2	2	4	2	4.19
LA 2	254-2	2	4	3	4.44
LA 2	254-2	2	4	4	3.67
LA 2	254-2	3	4	1	4.88
LA 2	254-2	3	4	2	7.04
LA 2	254-2	3	4	3	6.59
LA 2	254-2	3	4	4	5.78
LA 2	254-8	1	4	1	6.69
LA 2	254-8	1	4	2	7.77
LA 2	254-8	1	4	3	7.3
LA 2	254-8	1	4	4	6.17
LA 2	254-8	2	4	1	8.63
LA 2	254-8	2	4	2	8.4
LA 2	254-8	2	4	3	9.58
LA 2	254-8	2	4	4	12.84
LA 2	254-8	3	4	1	13.02
LA 2	254-8	3	4	2	8.76
LA 2	254-8	3	4	3	6.23
LA 2	254-8	3	4	4	7.44
LA 2	254-11	1	4	1	11.12
LA 2	254-11	1	4	2	10.2
LA 2	254-11	1	4	3	9.55
LA 2	254-11	1	4	4	11.21
LA 2	254-11	2	4	1	11.31
LA 2	254-11	2	4	2	11.35
LA 2	254-11	2	4	3	10.34
LA 2	254-11	2	4	4	10.94
LA 2	254-11	3	4	1	12
LA 2	254-11	3	4	2	11.5
LA 2	254-11	3	4	3	11.34
LA 2	254-11	3	4	4	11.83
L 1	9610	1	4	1	0
L 1	9610	1	4	2	2.67
L 1	9610	1	4	3	3.65
L 1	9610	1	4	4	1.79
L 1	9610	2	4	1	0
L 1	9610	2	4	2	0
L 1	9610	2	4	3	3.36
L 1	9610	2	4	4	3.96
L 1	9610	3	4	1	4.14
L 1	9610	3	4	2	4.71
L 1	9610	3	4	3	5.25
L 1	9610	3	4	4	6.7
L 1	9612	1	4	1	3.32
L 1	9612	1	4	2	4.45
L 1	9612	1	4	3	4.5
L 1	9612	1	4	4	4.29
L 1	9612	2	4	1	2.93
L 1	9612	2	4	2	4.46
L 1	9612	2	4	3	4.31
L 1	9612	2	4	4	3.53
L 1	9612	3	4	1	5
L 1	9612	3	4	2	4.6
L 1	9612	3	4	3	3.32
L 1	9612	3	4	4	3.68
L 1	9605	1	4	1	0
L 1	9605	1	4	2	5.9
L 1	9605	1	4	3	2.65
L 1	9605	1	4	4	1.66
L 1	9605	2	4	1	1.7
L 1	9605	2	4	2	2.8
L 1	9605	2	4	3	2.9
L 1	9605	2	4	4	2.15
L 1	9605	3	4	1	3.94
L 1	9605	3	4	2	0
L 1	9605	3	4	3	0
L 1	9605	3	4	4	3.15
L 1	748	1	4	1	3.94
L 1	748	1	4	2	3.62
L 1	748	1	4	3	3.02
L 1	748	1	4	4	3.03
L 1	748	2	4	1	3.04
L 1	748	2	4	2	3.08
L 1	748	2	4	3	3.55
L 1	748	2	4	4	3.73
L 1	748	3	4	1	3.51
L 1	748	3	4	2	4.05
L 1	748	3	4	3	3.71
L 1	748	3	4	4	0
L 1	9401	1	4	1	5.65
L 1	9401	1	4	2	4.18
L 1	9401	1	4	3	4.17
L 1	9401	1	4	4	4.44
L 1	9401	2	4	1	4.65
L 1	9401	2	4	2	4.75
L 1	9401	2	4	3	4.86
L 1	9401	2	4	4	5.15
L 1	9401	3	4	1	4.83
L 1	9401	3	4	2	3.9
L 1	9401	3	4	3	4.85
L 1	9401	3	4	4	6.67
L 1	9174	1	4	1	0
L 1	9174	1	4	2	3.15
L 1	9174	1	4	3	0
L 1	9174	1	4	4	0
L 1	9174	2	4	1	0
L 1	9174	2	4	2	2.1
L 1	9174	2	4	3	2.61
L 1	9174	2	4	4	1.42
L 1	9174	3	4	1	3.41
L 1	9174	3	4	2	2.5
L 1	9174	3	4	3	0
L 1	9174	3	4	4	3.36
L 1	9732	1	4	1	3.67
L 1	9732	1	4	2	2.13
L 1	9732	1	4	3	3.13
L 1	9732	1	4	4	4.35
L 1	9732	2	4	1	4.3
L 1	9732	2	4	2	3
L 1	9732	2	4	3	3.1
L 1	9732	2	4	4	2.08
L 1	9732	3	4	1	2.9
L 1	9732	3	4	2	1.78
L 1	9732	3	4	3	1.55
L 1	9732	3	4	4	2.61
L 1	9714	1	4	1	5.4
L 1	9714	1	4	2	2.47
L 1	9714	1	4	3	2.75
L 1	9714	1	4	4	3.6
L 1	9714	2	4	1	0.9
L 1	9714	2	4	2	3.81
L 1	9714	2	4	3	2.14
L 1	9714	2	4	4	4.11
L 1	9714	3	4	1	4.29
L 1	9714	3	4	2	2.75
L 1	9714	3	4	3	1.91
L 1	9714	3	4	4	1.13
L 1	0006	1	4	1	6.21
L 1	0006	1	4	2	6.77
L 1	0006	1	4	3	6.6
L 1	0006	1	4	4	7.08
L 1	0006	2	4	1	5.86
L 1	0006	2	4	2	6.8
L 1	0006	2	4	3	6.51
L 1	0006	2	4	4	6.34
L 1	0006	3	4	1	6.25
L 1	0006	3	4	2	7.68
L 1	0006	3	4	3	7.39
L 1	0006	3	4	4	7.75
L 1	254-2	1	4	1	3.2
L 1	254-2	1	4	2	5.52
L 1	254-2	1	4	3	3.35
L 1	254-2	1	4	4	5.78
L 1	254-2	2	4	1	3.95
L 1	254-2	2	4	2	5.23
L 1	254-2	2	4	3	3.05
L 1	254-2	2	4	4	0
L 1	254-2	3	4	1	0.9
L 1	254-2	3	4	2	4.68
L 1	254-2	3	4	3	4.04
L 1	254-2	3	4	4	4.62
L 1	254-8	1	4	1	3.2
L 1	254-8	1	4	2	3.7
L 1	254-8	1	4	3	3.26
L 1	254-8	1	4	4	1.75
L 1	254-8	2	4	1	2.05
L 1	254-8	2	4	2	2.72
L 1	254-8	2	4	3	3.27
L 1	254-8	2	4	4	0.9
L 1	254-8	3	4	1	3.13
L 1	254-8	3	4	2	3.63
L 1	254-8	3	4	3	3.32
L 1	254-8	3	4	4	3.9
L 1	254-11	1	4	1	4.18
L 1	254-11	1	4	2	5.28
L 1	254-11	1	4	3	3.6
L 1	254-11	1	4	4	3.49
L 1	254-11	2	4	1	4
L 1	254-11	2	4	2	2.5
L 1	254-11	2	4	3	4.7
L 1	254-11	2	4	4	2.38
L 1	254-11	3	4	1	4.05
L 1	254-11	3	4	2	3.07
L 1	254-11	3	4	3	3.62
L 1	254-11	3	4	4	0
L 2	9610	1	4	1	0
L 2	9610	1	4	2	10.08
L 2	9610	1	4	3	0
L 2	9610	1	4	4	0
L 2	9610	2	4	1	4.46
L 2	9610	2	4	2	0
L 2	9610	2	4	3	5.12
L 2	9610	2	4	4	4.56
L 2	9610	3	4	1	13.05
L 2	9610	3	4	2	12
L 2	9610	3	4	3	11.82
L 2	9610	3	4	4	9.02
L 2	9612	1	4	1	2.25
L 2	9612	1	4	2	2.77
L 2	9612	1	4	3	2.89
L 2	9612	1	4	4	3.02
L 2	9612	2	4	1	0
L 2	9612	2	4	2	0
L 2	9612	2	4	3	3.31
L 2	9612	2	4	4	3.05
L 2	9612	3	4	1	0
L 2	9612	3	4	2	1.8
L 2	9612	3	4	3	3.35
L 2	9612	3	4	4	2.18
L 2	9605	1	4	1	4.67
L 2	9605	1	4	2	2.54
L 2	9605	1	4	3	2.7
L 2	9605	1	4	4	3.9
L 2	9605	2	4	1	2.66
L 2	9605	2	4	2	3.3
L 2	9605	2	4	3	3.05
L 2	9605	2	4	4	3.53
L 2	9605	3	4	1	5.28
L 2	9605	3	4	2	2.18
L 2	9605	3	4	3	3.52
L 2	9605	3	4	4	3.93
L 2	748	1	4	1	4.12
L 2	748	1	4	2	3.41
L 2	748	1	4	3	3.86
L 2	748	1	4	4	3.97
L 2	748	2	4	1	3.94
L 2	748	2	4	2	4.32
L 2	748	2	4	3	3.45
L 2	748	2	4	4	4.03
L 2	748	3	4	1	2.03
L 2	748	3	4	2	2.93
L 2	748	3	4	3	4.41
L 2	748	3	4	4	3.83
L 2	9401	1	4	1	5.23
L 2	9401	1	4	2	4.27
L 2	9401	1	4	3	7.17
L 2	9401	1	4	4	3.53
L 2	9401	2	4	1	4.46
L 2	9401	2	4	2	5.48
L 2	9401	2	4	3	5.08
L 2	9401	2	4	4	5.03
L 2	9401	3	4	1	6.84
L 2	9401	3	4	2	9.62
L 2	9401	3	4	3	4.67
L 2	9401	3	4	4	5.61
L 2	9174	1	4	1	5.37
L 2	9174	1	4	2	3.9
L 2	9174	1	4	3	4.82
L 2	9174	1	4	4	3.31
L 2	9174	2	4	1	3.15
L 2	9174	2	4	2	3.91
L 2	9174	2	4	3	4.9
L 2	9174	2	4	4	3.98
L2	9174	3	4	1	3.16
L 2	9174	3	4	2	3.8
L 2	9174	3	4	3	5.34
L 2	9174	3	4	4	3.14
L 2	9732	1	4	1	4.88
L 2	9732	1	4	2	0
L 2	9732	1	4	3	0
L 2	9732	1	4	4	4.38
L 2	9732	2	4	1	3.42
L 2	9732	2	4	2	0
L 2	9732	2	4	3	0
L 2	9732	2	4	4	0
L 2	9732	3	4	1	3.54
L 2	9732	3	4	2	0
L 2	9732	3	4	3	4.64
L 2	9732	3	4	4	4.05
L 2	9714	1	4	1	3.17
L 2	9714	1	4	2	2.81
L 2	9714	1	4	3	3.02
L 2	9714	1	4	4	2.29
L 2	9714	2	4	1	2.76
L 2	9714	2	4	2	2.18
L 2	9714	2	4	3	1.14
L 2	9714	2	4	4	3.16
L 2	9714	3	4	1	2.74
L 2	9714	3	4	2	2.07
L 2	9714	3	4	3	1.39
L 2	9714	3	4	4	3.17
L 2	0006	1	4	1	4.75
L 2	0006	1	4	2	7.7
L 2	0006	1	4	3	6.29
L 2	0006	1	4	4	4
L 2	0006	2	4	1	4.6
L 2	0006	2	4	2	3.43
L 2	0006	2	4	3	5.7
L 2	0006	2	4	4	4.61
L 2	0006	3	4	1	10.27
L 2	0006	3	4	2	7.7
L 2	0006	3	4	3	6.7
L 2	0006	3	4	4	6.23
L 2	254-2	1	4	1	4.27
L 2	254-2	1	4	2	5.41
L 2	254-2	1	4	3	3.6
L 2	254-2	1	4	4	2.72
L 2	254-2	2	4	1	7
L 2	254-2	2	4	2	6.55
L 2	254-2	2	4	3	5.81
L 2	254-2	2	4	4	6.54
L 2	254-2	3	4	1	5.97
L 2	254-2	3	4	2	4.58
L 2	254-2	3	4	3	0.95
L 2	254-2	3	4	4	6.12
L 2	254-8	1	4	1	6.98
L 2	254-8	1	4	2	5.86
L 2	254-8	1	4	3	5.31
L 2	254-8	1	4	4	7.4
L 2	254-8	2	4	1	5.84
L 2	254-8	2	4	2	6.05
L 2	254-8	2	4	3	6.35
L 2	254-8	2	4	4	5.1
L 2	254-8	3	4	1	3.96
L 2	254-8	3	4	2	2.46
L 2	254-8	3	4	3	3.05
L 2	254-8	3	4	4	5.56
L 2	254-11	1	4	1	7.34
L 2	254-11	1	4	2	7.76
L 2	254-11	1	4	3	8.41
L 2	254-11	1	4	4	7.77
L 2	254-11	2	4	1	5.65
L 2	254-11	2	4	2	7.12
L 2	254-11	2	4	3	6.76
L 2	254-11	2	4	4	7.09
L 2	254-11	3	4	1	7.33
L 2	254-11	3	4	2	7.84
L 2	254-11	3	4	3	7.02
L 2	254-11	3	4	4	7.91
L 3	9610	1	4	1	3.38
L 3	9610	1	4	2	2.1
L 3	9610	1	4	3	2
L 3	9610	1	4	4	0
L 3	9610	2	4	1	0
L 3	9610	2	4	2	4.03
L 3	9610	2	4	3	4.83
L 3	9610	2	4	4	4.92
L 3	9610	3	4	1	3.8
L 3	9610	3	4	2	2.95
L 3	9610	3	4	3	3.44
L 3	9610	3	4	4	2.6
L 3	9612	1	4	1	2.6
L 3	9612	1	4	2	4.8
L 3	9612	1	4	3	2.16
L 3	9612	1	4	4	3
L 3	9612	2	4	1	0
L 3	9612	2	4	2	2.6
L 3	9612	2	4	3	3.42
L 3	9612	2	4	4	2.31
L 3	9612	3	4	1	2.15
L 3	9612	3	4	2	5.95
L 3	9612	3	4	3	4.12
L 3	9612	3	4	4	6
L 3	9605	1	4	1	2.2
L 3	9605	1	4	2	0
L 3	9605	1	4	3	2
L 3	9605	1	4	4	0
L 3	9605	2	4	1	3.8
L 3	9605	2	4	2	3.5
L 3	9605	2	4	3	3.77
L 3	9605	2	4	4	3.08
L 3	9605	3	4	1	3.84
L 3	9605	3	4	2	2.64
L 3	9605	3	4	3	3.45
L 3	9605	3	4	4	3.25
L 3	748	1	4	1	4.1
L 3	748	1	4	2	3.12
L 3	748	1	4	3	4.17
L 3	748	1	4	4	4.07
L 3	748	2	4	1	4.12
L 3	748	2	4	2	3.2
L 3	748	2	4	3	3.12
L 3	748	2	4	4	2.32
L 3	748	3	4	1	3.79
L 3	748	3	4	2	3.39
L 3	748	3	4	3	4.35
L 3	748	3	4	4	3.85
L 3	9401	1	4	1	6.6
L 3	9401	1	4	2	6.5
L 3	9401	1	4	3	7.21
L 3	9401	1	4	4	7.04
L 3	9401	2	4	1	6.89
L 3	9401	2	4	2	5.06
L 3	9401	2	4	3	7.85
L 3	9401	2	4	4	9.25
L 3	9401	3	4	1	7.39
L 3	9401	3	4	2	5.7
L 3	9401	3	4	3	8.6
L 3	9401	3	4	4	6.97
L 3	9174	1	4	1	0
L 3	9174	1	4	2	1.56
L 3	9174	1	4	3	0
L 3	9174	1	4	4	0
L 3	9174	2	4	1	0
L 3	9174	2	4	2	0
L 3	9174	2	4	3	0
L 3	9174	2	4	4	2.11
L 3	9174	3	4	1	2.65
L 3	9174	3	4	2	1.1
L 3	9174	3	4	3	2.02
L 3	9174	3	4	4	4.12
L 3	9732	1	4	1	0
L 3	9732	1	4	2	1.63
L 3	9732	1	4	3	3.14
L 3	9732	1	4	4	0
L 3	9732	2	4	1	0
L 3	9732	2	4	2	2.42
L 3	9732	2	4	3	1.57
L 3	9732	2	4	4	0
L 3	9732	3	4	1	0
L 3	9732	3	4	2	0
L 3	9732	3	4	3	0
L 3	9732	3	4	4	3.22
L 3	9714	1	4	1	5.43
L 3	9714	1	4	2	5.1
L 3	9714	1	4	3	6
L 3	9714	1	4	4	4.92
L 3	9714	2	4	1	4.43
L 3	9714	2	4	2	4.04
L 3	9714	2	4	3	4.53
L 3	9714	2	4	4	4.23
L 3	9714	3	4	1	3.78
L 3	9714	3	4	2	2.44
L 3	9714	3	4	3	2.8
L 3	9714	3	4	4	4.24
L 3	0006	1	4	1	2.2
L 3	0006	1	4	2	2.7
L 3	0006	1	4	3	4.73
L 3	0006	1	4	4	2.84
L 3	0006	2	4	1	1.5
L 3	0006	2	4	2	2.89
L 3	0006	2	4	3	3.75
L 3	0006	2	4	4	4.15
L 3	0006	3	4	1	1.23
L 3	0006	3	4	2	3.64
L 3	0006	3	4	3	4.71
L 3	0006	3	4	4	2.98
L 3	254-2	1	4	1	4.61
L 3	254-2	1	4	2	5.31
L 3	254-2	1	4	3	6.72
L 3	254-2	1	4	4	3.13
L 3	254-2	2	4	1	3.52
L 3	254-2	2	4	2	5.16
L 3	254-2	2	4	3	4.67
L 3	254-2	2	4	4	3.56
L 3	254-2	3	4	1	3.92
L 3	254-2	3	4	2	3.35
L 3	254-2	3	4	3	3.6
L 3	254-2	3	4	4	4.28
L 3	254-8	1	4	1	3.6
L 3	254-8	1	4	2	4.37
L 3	254-8	1	4	3	4.25
L 3	254-8	1	4	4	3.53
L 3	254-8	2	4	1	0
L 3	254-8	2	4	2	3.31
L 3	254-8	2	4	3	2.45
L 3	254-8	2	4	4	2.7
L 3	254-8	3	4	1	0
L 3	254-8	3	4	2	3.66
L 3	254-8	3	4	3	0
L 3	254-8	3	4	4	1.59
L 3	254-11	1	4	1	3.4
L 3	254-11	1	4	2	4.92
L 3	254-11	1	4	3	1.92
L 3	254-11	1	4	4	4.57
L 3	254-11	2	4	1	4.67
L 3	254-11	2	4	2	4.42
L 3	254-11	2	4	3	0
L 3	254-11	2	4	4	4.7
L 3	254-11	3	4	1	3.79
L 3	254-11	3	4	2	3.15
L 3	254-11	3	4	3	3.78
L 3	254-11	3	4	4	4.44
LO 2	9610	1	4	1	2.44
LO 2	9610	1	4	2	4.2
LO 2	9610	1	4	3	3.5
LO 2	9610	1	4	4	1.84
LO 2	9610	2	4	1	1.98
LO 2	9610	2	4	2	7.08
LO 2	9610	2	4	3	4.24
LO 2	9610	2	4	4	0
LO 2	9610	3	4	1	3.74
LO 2	9610	3	4	2	4.34
LO 2	9610	3	4	3	5.06
LO 2	9610	3	4	4	3.28
LO 2	9612	1	4	1	1.94
LO 2	9612	1	4	2	2.95
LO 2	9612	1	4	3	2.44
LO 2	9612	1	4	4	0
LO 2	9612	2	4	1	0
LO 2	9612	2	4	2	1.88
LO 2	9612	2	4	3	0
LO 2	9612	2	4	4	3.03
LO 2	9612	3	4	1	2.6
LO 2	9612	3	4	2	1.74
LO 2	9612	3	4	3	2.03
LO 2	9612	3	4	4	3.43
LO 2	9605	1	4	1	4.84
LO 2	9605	1	4	2	5.88
LO 2	9605	1	4	3	5.91
LO 2	9605	1	4	4	5.75
LO 2	9605	2	4	1	1.07
LO 2	9605	2	4	2	4.56
LO 2	9605	2	4	3	3.76
LO 2	9605	2	4	4	0
LO 2	9605	3	4	1	0
LO 2	9605	3	4	2	2.75
LO 2	9605	3	4	3	5
LO 2	9605	3	4	4	0
LO 2	748	1	4	1	3.03
LO 2	748	1	4	2	2.83
LO 2	748	1	4	3	2
LO 2	748	1	4	4	3.61
LO 2	748	2	4	1	2.87
LO 2	748	2	4	2	1.24
LO 2	748	2	4	3	3
LO 2	748	2	4	4	2.11
LO 2	748	3	4	1	0
LO 2	748	3	4	2	0
LO 2	748	3	4	3	2.74
LO 2	748	3	4	4	1.84
LO 2	9401	1	4	1	2.12
LO 2	9401	1	4	2	3.8
LO 2	9401	1	4	3	4.71
LO 2	9401	1	4	4	8.02
LO 2	9401	2	4	1	2.78
LO 2	9401	2	4	2	3.51
LO 2	9401	2	4	3	4.04
LO 2	9401	2	4	4	6.02
LO 2	9401	3	4	1	7.36
LO 2	9401	3	4	2	8.34
LO 2	9401	3	4	3	7.48
LO 2	9401	3	4	4	6.76
LO 2	9174	1	4	1	4.71
LO 2	9174	1	4	2	3.11
LO 2	9174	1	4	3	5.28
LO 2	9174	1	4	4	2.24
LO 2	9174	2	4	1	4.18
LO 2	9174	2	4	2	1.44
LO 2	9174	2	4	3	0.9
LO 2	9174	2	4	4	3.45
LO 2	9174	3	4	1	2.71
LO 2	9174	3	4	2	2.35
LO 2	9174	3	4	3	3.69
LO 2	9174	3	4	4	7.05
LO 2	9732	1	4	1	0
LO 2	9732	1	4	2	0
LO 2	9732	1	4	3	0
LO 2	9732	1	4	4	3.58
LO 2	9732	2	4	1	0
LO 2	9732	2	4	2	0
LO 2	9732	2	4	3	1.3
LO 2	9732	2	4	4	0
LO 2	9732	3	4	1	0
LO 2	9732	3	4	2	0
LO 2	9732	3	4	3	5.21
LO 2	9732	3	4	4	0
LO 2	9714	1	4	1	0
LO 2	9714	1	4	2	0
LO 2	9714	1	4	3	0
LO 2	9714	1	4	4	4.57
LO 2	9714	2	4	1	0
LO 2	9714	2	4	2	0
LO 2	9714	2	4	3	2.85
LO 2	9714	2	4	4	0
LO 2	9714	3	4	1	4
LO 2	9714	3	4	2	6.28
LO 2	9714	3	4	3	3.16
LO 2	9714	3	4	4	3.54
LO 2	0006	1	4	1	4.33
LO 2	0006	1	4	2	2.47
LO 2	0006	1	4	3	4.84
LO 2	0006	1	4	4	3.14
LO 2	0006	2	4	1	4.23
LO 2	0006	2	4	2	5.33
LO 2	0006	2	4	3	4.27
LO 2	0006	2	4	4	0.9
LO 2	0006	3	4	1	1.98
LO 2	0006	3	4	2	1.93
LO 2	0006	3	4	3	2.28
LO 2	0006	3	4	4	3.87
LO 2	254-2	1	4	1	4.1
LO 2	254-2	1	4	2	3.9
LO 2	254-2	1	4	3	4.62
LO 2	254-2	1	4	4	3.82
LO 2	254-2	2	4	1	2.6
LO 2	254-2	2	4	2	3.3
LO 2	254-2	2	4	3	3.15
LO 2	254-2	2	4	4	3.58
LO 2	254-2	3	4	1	3.15
LO 2	254-2	3	4	2	3.04
LO 2	254-2	3	4	3	3.19
LO 2	254-2	3	4	4	2.78
LO 2	254-8	1	4	1	6.31
LO 2	254-8	1	4	2	1.7
LO 2	254-8	1	4	3	5.8
LO 2	254-8	1	4	4	4.1
LO 2	254-8	2	4	1	2.38
LO 2	254-8	2	4	2	5.19
LO 2	254-8	2	4	3	3
LO 2	254-8	2	4	4	3.17
LO 2	254-8	3	4	1	2.16
LO 2	254-8	3	4	2	1.44
LO 2	254-8	3	4	3	2.1
LO 2	254-8	3	4	4	3.15
LO 2	254-11	1	4	1	2.25
LO 2	254-11	1	4	2	3.35
LO 2	254-11	1	4	3	5.3
LO 2	254-11	1	4	4	4.68
LO 2	254-11	2	4	1	0
LO 2	254-11	2	4	2	4.07
LO 2	254-11	2	4	3	2.97
LO 2	254-11	2	4	4	4.75
LO 2	254-11	3	4	1	2.41
LO 2	254-11	3	4	2	3.73
LO 2	254-11	3	4	3	3.48
LO 2	254-11	3	4	4	3.85
LO 1	9610	1	4	1	0
LO 1	9610	1	4	2	2.15
LO 1	9610	1	4	3	2.25
LO 1	9610	1	4	4	2.3
LO 1	9610	2	4	1	0
LO 1	9610	2	4	2	5.9
LO 1	9610	2	4	3	3
LO 1	9610	2	4	4	6.68
LO 1	9610	3	4	1	6.27
LO 1	9610	3	4	2	5.07
LO 1	9610	3	4	3	4.99
LO 1	9610	3	4	4	2
LO 1	9612	1	4	1	2.12
LO 1	9612	1	4	2	2.83
LO 1	9612	1	4	3	1.68
LO 1	9612	1	4	4	2.26
LO 1	9612	2	4	1	0.46
LO 1	9612	2	4	2	0.51
LO 1	9612	2	4	3	1.84
LO 1	9612	2	4	4	0
LO 1	9612	3	4	1	1.45
LO 1	9612	3	4	2	2.27
LO 1	9612	3	4	3	2.21
LO 1	9612	3	4	4	1.86
LO 1	9605	1	4	1	5.94
LO 1	9605	1	4	2	3.66
LO 1	9605	1	4	3	7.22
LO 1	9605	1	4	4	4.62
LO 1	9605	2	4	1	0
LO 1	9605	2	4	2	0
LO 1	9605	2	4	3	2.6
LO 1	9605	2	4	4	1.55
LO 1	9605	3	4	1	5.07
LO 1	9605	3	4	2	0
LO 1	9605	3	4	3	2.57
LO 1	9605	3	4	4	3.7
LO 1	748	1	4	1	2.74
LO 1	748	1	4	2	2.61
LO 1	748	1	4	3	1.68
LO 1	748	1	4	4	2.43
LO 1	748	2	4	1	3.9
LO 1	748	2	4	2	3.85
LO 1	748	2	4	3	3.94
LO 1	748	2	4	4	4.04
LO 1	748	3	4	1	1.76
LO 1	748	3	4	2	2.77
LO 1	748	3	4	3	3.26
LO 1	748	3	4	4	2.13
LO 1	9401	1	4	1	2.16
LO 1	9401	1	4	2	8.23
LO 1	9401	1	4	3	7.58
LO 1	9401	1	4	4	4.16
LO 1	9401	2	4	1	5.59
LO 1	9401	2	4	2	6.24
LO 1	9401	2	4	3	8.96
LO 1	9401	2	4	4	7.3
LO 1	9401	3	4	1	4.49
LO 1	9401	3	4	2	8.02
LO 1	9401	3	4	3	7.04
LO 1	9401	3	4	4	6.5
LO 1	9174	1	4	1	3.24
LO 1	9174	1	4	2	2.19
LO 1	9174	1	4	3	4.25
LO 1	9174	1	4	4	3.88
LO 1	9174	2	4	1	0
LO 1	9174	2	4	2	3.9
LO 1	9174	2	4	3	1.7
LO 1	9174	2	4	4	2.68
LO 1	9174	3	4	1	2
LO 1	9174	3	4	2	2.97
LO 1	9174	3	4	3	4.13
LO 1	9174	3	4	4	1.64
LO 1	9732	1	4	1	1.84
LO 1	9732	1	4	2	3.5
LO 1	9732	1	4	3	1.21
LO 1	9732	1	4	4	2.98
LO 1	9732	2	4	1	2.73
LO 1	9732	2	4	2	2.7
LO 1	9732	2	4	3	2.9
LO 1	9732	2	4	4	3.32
LO 1	9732	3	4	1	3.02
LO 1	9732	3	4	2	2.7
LO 1	9732	3	4	3	3.1
LO 1	9732	3	4	4	1.8
LO 1	9714	1	4	1	2.65
LO 1	9714	1	4	2	3.7
LO 1	9714	1	4	3	2.7
LO 1	9714	1	4	4	2.22
LO 1	9714	2	4	1	2.4
LO 1	9714	2	4	2	2.92
LO 1	9714	2	4	3	2.74
LO 1	9714	2	4	4	1.81
LO 1	9714	3	4	1	0.9
LO 1	9714	3	4	2	3.25
LO 1	9714	3	4	3	1.24
LO 1	9714	3	4	4	1.47
LO 1	0006	1	4	1	5.57
LO 1	0006	1	4	2	6.04
LO 1	0006	1	4	3	6.35
LO 1	0006	1	4	4	6.59
LO 1	0006	2	4	1	5.56
LO 1	0006	2	4	2	6.65
LO 1	0006	2	4	3	6.3
LO 1	0006	2	4	4	6.55
LO 1	0006	3	4	1	7.02
LO 1	0006	3	4	2	6.57
LO 1	0006	3	4	3	7.09
LO 1	0006	3	4	4	3.93
LO 1	254-2	1	4	1	2.67
LO 1	254-2	1	4	2	0
LO 1	254-2	1	4	3	2.97
LO 1	254-2	1	4	4	0
LO 1	254-2	2	4	1	3.39
LO 1	254-2	2	4	2	1.8
LO 1	254-2	2	4	3	2.16
LO 1	254-2	2	4	4	3.28
LO 1	254-2	3	4	1	2.77
LO 1	254-2	3	4	2	0
LO 1	254-2	3	4	3	2.1
LO 1	254-2	3	4	4	1.28
LO 1	254-8	1	4	1	3.94
LO 1	254-8	1	4	2	4.5
LO 1	254-8	1	4	3	6.05
LO 1	254-8	1	4	4	6.48
LO 1	254-8	2	4	1	4.9
LO 1	254-8	2	4	2	5.66
LO 1	254-8	2	4	3	5.83
LO 1	254-8	2	4	4	3.25
LO 1	254-8	3	4	1	3.53
LO 1	254-8	3	4	2	3.14
LO 1	254-8	3	4	3	6.22
LO 1	254-8	3	4	4	4.84
LO 1	254-11	1	4	1	5.36
LO 1	254-11	1	4	2	6.38
LO 1	254-11	1	4	3	6.25
LO 1	254-11	1	4	4	6.58
LO 1	254-11	2	4	1	6.3
LO 1	254-11	2	4	2	6.36
LO 1	254-11	2	4	3	7.72
LO 1	254-11	2	4	4	6.61
LO 1	254-11	3	4	1	5.93
LO 1	254-11	3	4	2	5.32
LO 1	254-11	3	4	3	5.62
LO 1	254-11	3	4	4	5.95
OT 1	9610	1	4	1	2.73
OT 1	9610	1	4	2	2.65
OT 1	9610	1	4	3	1.2
OT 1	9610	1	4	4	1.9
OT 1	9610	2	4	1	1.07
OT 1	9610	2	4	2	2.57
OT 1	9610	2	4	3	1.92
OT 1	9610	2	4	4	0.8
OT 1	9610	3	4	1	0
OT 1	9610	3	4	2	2.07
OT 1	9610	3	4	3	2.97
OT 1	9610	3	4	4	2.84
OT 1	9612	1	4	1	2.73
OT 1	9612	1	4	2	3.62
OT 1	9612	1	4	3	0
OT 1	9612	1	4	4	1.44
OT 1	9612	2	4	1	2.4
OT 1	9612	2	4	2	1.5
OT 1	9612	2	4	3	0
OT 1	9612	2	4	4	1.8
OT 1	9612	3	4	1	0
OT 1	9612	3	4	2	0
OT 1	9612	3	4	3	0
OT 1	9612	3	4	4	3.41
OT 1	9605	1	4	1	1.61
OT 1	9605	1	4	2	1
OT 1	9605	1	4	3	1.33
OT 1	9605	1	4	4	3.27
OT 1	9605	2	4	1	1.26
OT 1	9605	2	4	2	1.03
OT 1	9605	2	4	3	1.92
OT 1	9605	2	4	4	5.34
OT 1	9605	3	4	1	2.23
OT 1	9605	3	4	2	2.98
OT 1	9605	3	4	3	4.15
OT 1	9605	3	4	4	0.85
OT 1	748	1	4	1	2.45
OT 1	748	1	4	2	2.76
OT 1	748	1	4	3	2.12
OT 1	748	1	4	4	1.94
OT 1	748	2	4	1	1.66
OT 1	748	2	4	2	2.1
OT 1	748	2	4	3	1.77
OT 1	748	2	4	4	2.23
OT 1	748	3	4	1	1.91
OT 1	748	3	4	2	1.7
OT 1	748	3	4	3	1.18
OT 1	748	3	4	4	1.68
OT 1	9401	1	4	1	2.91
OT 1	9401	1	4	2	5.14
OT 1	9401	1	4	3	1.48
OT 1	9401	1	4	4	1.89
OT 1	9401	2	4	1	7.76
OT 1	9401	2	4	2	6.29
OT 1	9401	2	4	3	3.56
OT 1	9401	2	4	4	6.06
OT 1	9401	3	4	1	11.6
OT 1	9401	3	4	2	10.08
OT 1	9401	3	4	3	11.02
OT 1	9401	3	4	4	2.31
OT 1	9174	1	4	1	5.74
OT 1	9174	1	4	2	5.91
OT 1	9174	1	4	3	8.81
OT 1	9174	1	4	4	6.86
OT 1	9174	2	4	1	8.07
OT 1	9174	2	4	2	7.03
OT 1	9174	2	4	3	8.14
OT 1	9174	2	4	4	8.56
OT 1	9174	3	4	1	4.98
OT 1	9174	3	4	2	6.24
OT 1	9174	3	4	3	5.77
OT 1	9174	3	4	4	8.62
OT 1	9732	1	4	1	1.81
OT 1	9732	1	4	2	1.44
OT 1	9732	1	4	3	1.2
OT 1	9732	1	4	4	2.01
OT 1	9732	2	4	1	1.5
OT 1	9732	2	4	2	1.4
OT 1	9732	2	4	3	0
OT 1	9732	2	4	4	1.45
OT 1	9732	3	4	1	0
OT 1	9732	3	4	2	2.5
OT 1	9732	3	4	3	1.75
OT 1	9732	3	4	4	1.64
OT 1	9714	1	4	1	0
OT 1	9714	1	4	2	0
OT 1	9714	1	4	3	1.61
OT 1	9714	1	4	4	4.45
OT 1	9714	2	4	1	1.8
OT 1	9714	2	4	2	0
OT 1	9714	2	4	3	1.6
OT 1	9714	2	4	4	0
OT 1	9714	3	4	1	3.47
OT 1	9714	3	4	2	0
OT 1	9714	3	4	3	3.67
OT 1	9714	3	4	4	3.09
OT 1	0006	1	4	1	10
OT 1	0006	1	4	2	9.2
OT 1	0006	1	4	3	8.47
OT 1	0006	1	4	4	3.92
OT 1	0006	2	4	1	3.13
OT 1	0006	2	4	2	2.4
OT 1	0006	2	4	3	7.07
OT 1	0006	2	4	4	4.57
OT 1	0006	3	4	1	4.28
OT 1	0006	3	4	2	2.44
OT 1	0006	3	4	3	3.73
OT 1	0006	3	4	4	6.51
OT 1	254-2	1	4	1	6
OT 1	254-2	1	4	2	8.8
OT 1	254-2	1	4	3	5.38
OT 1	254-2	1	4	4	5.69
OT 1	254-2	2	4	1	2.4
OT 1	254-2	2	4	2	6.77
OT 1	254-2	2	4	3	5.63
OT 1	254-2	2	4	4	4.2
OT 1	254-2	3	4	1	5.4
OT 1	254-2	3	4	2	6.39
OT 1	254-2	3	4	3	5.43
OT 1	254-2	3	4	4	2.63
OT 1	254-8	1	4	1	5.6
OT 1	254-8	1	4	2	5.7
OT 1	254-8	1	4	3	7.31
OT 1	254-8	1	4	4	7.84
OT 1	254-8	2	4	1	8.5
OT 1	254-8	2	4	2	5.6
OT 1	254-8	2	4	3	5.4
OT 1	254-8	2	4	4	7.18
OT 1	254-8	3	4	1	5.64
OT 1	254-8	3	4	2	3.61
OT 1	254-8	3	4	3	4.25
OT 1	254-8	3	4	4	4.1
OT 1	254-11	1	4	1	1.12
OT 1	254-11	1	4	2	1.75
OT 1	254-11	1	4	3	3.47
OT 1	254-11	1	4	4	1.8
OT 1	254-11	2	4	1	2.1
OT 1	254-11	2	4	2	2.4
OT 1	254-11	2	4	3	3.53
OT 1	254-11	2	4	4	5.91
OT 1	254-11	3	4	1	7.8
OT 1	254-11	3	4	2	9
OT 1	254-11	3	4	3	6.7
OT 1	254-11	3	4	4	4.07
OT 2	9610	1	4	1	2.3
OT 2	9610	1	4	2	1.65
OT 2	9610	1	4	3	1.4
OT 2	9610	1	4	4	1.74
OT 2	9610	2	4	1	2.66
OT 2	9610	2	4	2	1.68
OT 2	9610	2	4	3	3.11
OT 2	9610	2	4	4	2.67
OT 2	9610	3	4	1	2.03
OT 2	9610	3	4	2	1.9
OT 2	9610	3	4	3	3
OT 2	9610	3	4	4	6.96
OT 2	9612	1	4	1	1.67
OT 2	9612	1	4	2	2.92
OT 2	9612	1	4	3	3.12
OT 2	9612	1	4	4	1.85
OT 2	9612	2	4	1	1.8
OT 2	9612	2	4	2	3.47
OT 2	9612	2	4	3	2.5
OT 2	9612	2	4	4	1.5
OT 2	9612	3	4	1	2.68
OT 2	9612	3	4	2	1.3
OT 2	9612	3	4	3	1.25
OT 2	9612	3	4	4	4.07
OT 2	9605	1	4	1	1.4
OT 2	9605	1	4	2	1.35
OT 2	9605	1	4	3	2.95
OT 2	9605	1	4	4	2.78
OT 2	9605	2	4	1	2.21
OT 2	9605	2	4	2	1
OT 2	9605	2	4	3	1.6
OT 2	9605	2	4	4	1.32
OT 2	9605	3	4	1	1.96
OT 2	9605	3	4	2	2.5
OT 2	9605	3	4	3	1.48
OT 2	9605	3	4	4	1.46
OT 2	748	1	4	1	2.91
OT 2	748	1	4	2	2.74
OT 2	748	1	4	3	0
OT 2	748	1	4	4	2.6
OT 2	748	2	4	1	1.5
OT 2	748	2	4	2	0
OT 2	748	2	4	3	5.42
OT 2	748	2	4	4	3.97
OT 2	748	3	4	1	3.7
OT 2	748	3	4	2	1.1
OT 2	748	3	4	3	1.98
OT 2	748	3	4	4	2.64
OT 2	9401	1	4	1	7.6
OT 2	9401	1	4	2	6
OT 2	9401	1	4	3	5.45
OT 2	9401	1	4	4	6.65
OT 2	9401	2	4	1	4.15
OT 2	9401	2	4	2	7.82
OT 2	9401	2	4	3	2.97
OT 2	9401	2	4	4	7.11
OT 2	9401	3	4	1	8.69
OT 2	9401	3	4	2	9.51
OT 2	9401	3	4	3	3.58
OT 2	9401	3	4	4	8.34
OT 2	9174	1	4	1	5.87
OT 2	9174	1	4	2	5.69
OT 2	9174	1	4	3	4.39
OT 2	9174	1	4	4	5.18
OT 2	9174	2	4	1	4.63
OT 2	9174	2	4	2	4.32
OT 2	9174	2	4	3	4.97
OT 2	9174	2	4	4	4.73
OT 2	9174	3	4	1	5.73
OT 2	9174	3	4	2	4.15
OT 2	9174	3	4	3	4.88
OT 2	9174	3	4	4	6.21
OT 2	9732	1	4	1	1.4
OT 2	9732	1	4	2	1.16
OT 2	9732	1	4	3	1.4
OT 2	9732	1	4	4	1.19
OT 2	9732	2	4	1	1.9
OT 2	9732	2	4	2	1.6
OT 2	9732	2	4	3	2.02
OT 2	9732	2	4	4	2
OT 2	9732	3	4	1	2.16
OT 2	9732	3	4	2	2.07
OT 2	9732	3	4	3	2.14
OT 2	9732	3	4	4	2.21
OT 2	9714	1	4	1	1.7
OT 2	9714	1	4	2	0
OT 2	9714	1	4	3	3
OT 2	9714	1	4	4	2.4
OT 2	9714	2	4	1	0
OT 2	9714	2	4	2	1.4
OT 2	9714	2	4	3	1.6
OT 2	9714	2	4	4	0
OT 2	9714	3	4	1	2.5
OT 2	9714	3	4	2	3
OT 2	9714	3	4	3	1.4
OT 2	9714	3	4	4	0
OT 2	0006	1	4	1	11
OT 2	0006	1	4	2	10.26
OT 2	0006	1	4	3	9.33
OT 2	0006	1	4	4	5.9
OT 2	0006	2	4	1	10.76
OT 2	0006	2	4	2	8.9
OT 2	0006	2	4	3	6.18
OT 2	0006	2	4	4	13.6
OT 2	0006	3	4	1	7.53
OT 2	0006	3	4	2	2.5
OT 2	0006	3	4	3	12.34
OT 2	0006	3	4	4	12.03
OT 2	254-2	1	4	1	6.6
OT 2	254-2	1	4	2	1.18
OT 2	254-2	1	4	3	3.86
OT 2	254-2	1	4	4	5.17
OT 2	254-2	2	4	1	3.5
OT 2	254-2	2	4	2	2.47
OT 2	254-2	2	4	3	1.65
OT 2	254-2	2	4	4	3.98
OT 2	254-2	3	4	1	6.72
OT 2	254-2	3	4	2	2.36
OT 2	254-2	3	4	3	2.18
OT 2	254-2	3	4	4	3.36
OT 2	254-8	1	4	1	6.94
OT 2	254-8	1	4	2	7.92
OT 2	254-8	1	4	3	6.41
OT 2	254-8	1	4	4	5.08
OT 2	254-8	2	4	1	6.95
OT 2	254-8	2	4	2	6.45
OT 2	254-8	2	4	3	5.36
OT 2	254-8	2	4	4	6.87
OT 2	254-8	3	4	1	6.83
OT 2	254-8	3	4	2	7.55
OT 2	254-8	3	4	3	6.64
OT 2	254-8	3	4	4	8.71
OT 2	254-11	1	4	1	7
OT 2	254-11	1	4	2	11.15
OT 2	254-11	1	4	3	10.08
OT 2	254-11	1	4	4	6.21
OT 2	254-11	2	4	1	7.7
OT 2	254-11	2	4	2	8.2
OT 2	254-11	2	4	3	7.2
OT 2	254-11	2	4	4	5.05
OT 2	254-11	3	4	1	9.65
OT 2	254-11	3	4	2	5.03
OT 2	254-11	3	4	3	5.6
OT 2	254-11	3	4	4	11.17
OT 3	9610	1	4	1	2.29
OT 3	9610	1	4	2	1.59
OT 3	9610	1	4	3	1.54
OT 3	9610	1	4	4	1.32
OT 3	9610	2	4	1	1.61
OT 3	9610	2	4	2	2.58
OT 3	9610	2	4	3	2.64
OT 3	9610	2	4	4	1.89
OT 3	9610	3	4	1	1.48
OT 3	9610	3	4	2	3.04
OT 3	9610	3	4	3	2.77
OT 3	9610	3	4	4	2.97
OT 3	9612	1	4	1	1.1
OT 3	9612	1	4	2	2.14
OT 3	9612	1	4	3	1.89
OT 3	9612	1	4	4	2.59
OT 3	9612	2	4	1	2.7
OT 3	9612	2	4	2	1.32
OT 3	9612	2	4	3	2.54
OT 3	9612	2	4	4	0.9
OT 3	9612	3	4	1	2
OT 3	9612	3	4	2	0.85
OT 3	9612	3	4	3	1.75
OT 3	9612	3	4	4	1.36
OT 3	9605	1	4	1	5.27
OT 3	9605	1	4	2	3.43
OT 3	9605	1	4	3	3.74
OT 3	9605	1	4	4	3.4
OT 3	9605	2	4	1	4.3
OT 3	9605	2	4	2	2.6
OT 3	9605	2	4	3	3.6
OT 3	9605	2	4	4	4
OT 3	9605	3	4	1	0
OT 3	9605	3	4	2	2.07
OT 3	9605	3	4	3	3.94
OT 3	9605	3	4	4	4.27
OT 3	748	1	4	1	1.35
OT 3	748	1	4	2	2.34
OT 3	748	1	4	3	0
OT 3	748	1	4	4	4.04
OT 3	748	2	4	1	3.7
OT 3	748	2	4	2	3.54
OT 3	748	2	4	3	3.1
OT 3	748	2	4	4	3.25
OT 3	748	3	4	1	3.6
OT 3	748	3	4	2	2.96
OT 3	748	3	4	3	0
OT 3	748	3	4	4	3.83
OT 3	9401	1	4	1	5.02
OT 3	9401	1	4	2	4.44
OT 3	9401	1	4	3	5.46
OT 3	9401	1	4	4	7.03
OT 3	9401	2	4	1	6.67
OT 3	9401	2	4	2	8.64
OT 3	9401	2	4	3	3.85
OT 3	9401	2	4	4	7.13
OT 3	9401	3	4	1	5.78
OT 3	9401	3	4	2	4.01
OT 3	9401	3	4	3	4.21
OT 3	9401	3	4	4	6.85
OT 3	9174	1	4	1	2.29
OT 3	9174	1	4	2	1.59
OT 3	9174	1	4	3	3.58
OT 3	9174	1	4	4	3.06
OT 3	9174	2	4	1	1.61
OT 3	9174	2	4	2	2.97
OT 3	9174	2	4	3	4.05
OT 3	9174	2	4	4	6.14
OT 3	9174	3	4	1	1.13
OT 3	9174	3	4	2	0.9
OT 3	9174	3	4	3	2.77
OT 3	9174	3	4	4	2.9
OT 3	9732	1	4	1	2.68
OT 3	9732	1	4	2	0
OT 3	9732	1	4	3	0
OT 3	9732	1	4	4	2.72
OT 3	9732	2	4	1	0
OT 3	9732	2	4	2	1.38
OT 3	9732	2	4	3	0
OT 3	9732	2	4	4	0
OT 3	9732	3	4	1	4.5
OT 3	9732	3	4	2	0
OT 3	9732	3	4	3	4.38
OT 3	9732	3	4	4	0
OT 3	9714	1	4	1	2.88
OT 3	9714	1	4	2	1.66
OT 3	9714	1	4	3	1.42
OT 3	9714	1	4	4	0
OT 3	9714	2	4	1	0
OT 3	9714	2	4	2	1.69
OT 3	9714	2	4	3	1.42
OT 3	9714	2	4	4	0
OT 3	9714	3	4	1	2.23
OT 3	9714	3	4	2	1.56
OT 3	9714	3	4	3	1.82
OT 3	9714	3	4	4	2.49
OT 3	0006	1	4	1	9.07
OT 3	0006	1	4	2	7.94
OT 3	0006	1	4	3	7.47
OT 3	0006	1	4	4	6.12
OT 3	0006	2	4	1	8.4
OT 3	0006	2	4	2	7.8
OT 3	0006	2	4	3	5.44
OT 3	0006	2	4	4	6.59
OT 3	0006	3	4	1	8.21
OT 3	0006	3	4	2	9
OT 3	0006	3	4	3	6.34
OT 3	0006	3	4	4	6.3
OT 3	254-2	1	4	1	3.84
OT 3	254-2	1	4	2	4.42
OT 3	254-2	1	4	3	4.71
OT 3	254-2	1	4	4	2.99
OT 3	254-2	2	4	1	1.1
OT 3	254-2	2	4	2	3.31
OT 3	254-2	2	4	3	2.03
OT 3	254-2	2	4	4	3.68
OT 3	254-2	3	4	1	3.75
OT 3	254-2	3	4	2	3.92
OT 3	254-2	3	4	3	0.9
OT 3	254-2	3	4	4	4.18
OT 3	254-8	1	4	1	0
OT 3	254-8	1	4	2	2.25
OT 3	254-8	1	4	3	5.37
OT 3	254-8	1	4	4	2.5
OT 3	254-8	2	4	1	2.06
OT 3	254-8	2	4	2	2.55
OT 3	254-8	2	4	3	4.63
[truncated: 593 more rows]

## Sheet: AM20
section	be	leaf	dpi	spot	ls
A 1	9610	1	4	1	9.72
A 1	9610	1	4	2	8.26
A 1	9610	1	4	3	10.27
A 1	9610	1	4	4	9.93
A 1	9610	2	4	1	7.13
A 1	9610	2	4	2	8.83
A 1	9610	2	4	3	7.44
A 1	9610	2	4	4	11.57
A 1	9610	3	4	1	13.22
A 1	9610	3	4	2	9.44
A 1	9610	3	4	3	11.2
A 1	9610	3	4	4	8.03
A 1	9612	1	4	1	2.85
A 1	9612	1	4	2	2.54
A 1	9612	1	4	3	2.95
A 1	9612	1	4	4	2.78
A 1	9612	2	4	1	2.75
A 1	9612	2	4	2	3.18
A 1	9612	2	4	3	2.76
A 1	9612	2	4	4	3.81
A 1	9612	3	4	1	3.94
A 1	9612	3	4	2	4.81
A 1	9612	3	4	3	6.98
A 1	9612	3	4	4	4.6
A 1	9605	1	4	1	10.7
A 1	9605	1	4	2	10.7
A 1	9605	1	4	3	9.7
A 1	9605	1	4	4	10.8
A 1	9605	2	4	1	11.8
A 1	9605	2	4	2	8.9
A 1	9605	2	4	3	12.6
A 1	9605	2	4	4	11.75
A 1	9605	3	4	1	13.24
A 1	9605	3	4	2	12.6
A 1	9605	3	4	3	10.06
A 1	9605	3	4	4	12.66
A 1	748	1	4	1	14.04
A 1	748	1	4	2	9.74
A 1	748	1	4	3	11.75
A 1	748	1	4	4	10.61
A 1	748	2	4	1	11.8
A 1	748	2	4	2	9.22
A 1	748	2	4	3	9.57
A 1	748	2	4	4	12.03
A 1	748	3	4	1	11.5
A 1	748	3	4	2	11.7
A 1	748	3	4	3	10.7
A 1	748	3	4	4	11.64
A 1	9401	1	4	1	31
A 1	9401	1	4	2	27
A 1	9401	1	4	3	28
A 1	9401	1	4	4	30
A 1	9401	2	4	1	17.3
A 1	9401	2	4	2	23.8
A 1	9401	2	4	3	26.5
A 1	9401	2	4	4	29.55
A 1	9401	3	4	1	18.7
A 1	9401	3	4	2	30
A 1	9401	3	4	3	20
A 1	9401	3	4	4	28
A 1	9174	1	4	1	11.51
A 1	9174	1	4	2	12.54
A 1	9174	1	4	3	12.83
A 1	9174	1	4	4	11.76
A 1	9174	2	4	1	15.82
A 1	9174	2	4	2	12.95
A 1	9174	2	4	3	11.71
A 1	9174	2	4	4	12.74
A 1	9174	3	4	1	13.7
A 1	9174	3	4	2	11.96
A 1	9174	3	4	3	11.42
A 1	9174	3	4	4	12.73
A 1	9732	1	4	1	2.73
A 1	9732	1	4	2	4.3
A 1	9732	1	4	3	3.18
A 1	9732	1	4	4	3.32
A 1	9732	2	4	1	6.2
A 1	9732	2	4	2	5.47
A 1	9732	2	4	3	7.34
A 1	9732	2	4	4	7.34
A 1	9732	3	4	1	5.09
A 1	9732	3	4	2	5.8
A 1	9732	3	4	3	3.74
A 1	9732	3	4	4	3.29
A 1	9714	1	4	1	9.94
A 1	9714	1	4	2	4.41
A 1	9714	1	4	3	9.31
A 1	9714	1	4	4	9.03
A 1	9714	2	4	1	1.63
A 1	9714	2	4	2	4.91
A 1	9714	2	4	3	7.29
A 1	9714	2	4	4	6.23
A 1	9714	3	4	1	6.61
A 1	9714	3	4	2	6.07
A 1	9714	3	4	3	6.52
A 1	9714	3	4	4	7.66
A 1	0006	1	4	1	24.13
A 1	0006	1	4	2	22.74
A 1	0006	1	4	3	24.45
A 1	0006	1	4	4	25.45
A 1	0006	2	4	1	22.51
A 1	0006	2	4	2	23.06
A 1	0006	2	4	3	21.6
A 1	0006	2	4	4	22.64
A 1	0006	3	4	1	21.8
A 1	0006	3	4	2	22.18
A 1	0006	3	4	3	21.86
A1	0006	3	4	4	21.97
A 1	254-2	1	4	1	13
A 1	254-2	1	4	2	13.23
A 1	254-2	1	4	3	15.12
A 1	254-2	1	4	4	14.72
A 1	254-2	2	4	1	14.58
A 1	254-2	2	4	2	14.05
A 1	254-2	2	4	3	15.03
A 1	254-2	2	4	4	14.34
A 1	254-2	3	4	1	15.1
A 1	254-2	3	4	2	14.62
A 1	254-2	3	4	3	14.72
A 1	254-2	3	4	4	15.43
A 1	254-8	1	4	1	11.91
A 1	254-8	1	4	2	13.7
A 1	254-8	1	4	3	11.92
A 1	254-8	1	4	4	13.27
A 1	254-8	2	4	1	12.15
A 1	254-8	2	4	2	10.82
A 1	254-8	2	4	3	11.12
A 1	254-8	2	4	4	10.26
A 1	254-8	3	4	1	13.41
A 1	254-8	3	4	2	11.13
A 1	254-8	3	4	3	11.77
A 1	254-8	3	4	4	13.47
A 1	254-11	1	4	1	19.48
A 1	254-11	1	4	2	13.56
A 1	254-11	1	4	3	13.91
A 1	254-11	1	4	4	14.83
A 1	254-11	2	4	1	15.39
A 1	254-11	2	4	2	14.6
A 1	254-11	2	4	3	15.38
A 1	254-11	2	4	4	15.46
A 1	254-11	3	4	1	15.95
A 1	254-11	3	4	2	13.96
A 1	254-11	3	4	3	14
A 1	254-11	3	4	4	16.86
A 2	9610	1	4	1	6.56
A 2	9610	1	4	2	5.02
A 2	9610	1	4	3	5.58
A 2	9610	1	4	4	7.85
A 2	9610	2	4	1	8.23
A 2	9610	2	4	2	10.17
A 2	9610	2	4	3	5.83
A 2	9610	2	4	4	5.25
A 2	9610	3	4	1	6.08
A 2	9610	3	4	2	7.34
A 2	9610	3	4	3	6.81
A 2	9610	3	4	4	7.61
A 2	9612	1	4	1	2.03
A 2	9612	1	4	2	1.83
A 2	9612	1	4	3	1.5
A 2	9612	1	4	4	0
A 2	9612	2	4	1	0
A 2	9612	2	4	2	1.87
A 2	9612	2	4	3	1.38
A 2	9612	2	4	4	2.56
A 2	9612	3	4	1	2.35
A 2	9612	3	4	2	1.88
A 2	9612	3	4	3	1.63
A 2	9612	3	4	4	2.04
A 2	9605	1	4	1	8.58
A 2	9605	1	4	2	5.92
A 2	9605	1	4	3	4.72
A 2	9605	1	4	4	10
A 2	9605	2	4	1	12.34
A 2	9605	2	4	2	10.15
A 2	9605	2	4	3	6.34
A 2	9605	2	4	4	10.77
A 2	9605	3	4	1	9
A 2	9605	3	4	2	1.056
A 2	9605	3	4	3	7.6
A 2	9605	3	4	4	5.75
A 2	748	1	4	1	3.16
A 2	748	1	4	2	3.35
A 2	748	1	4	3	3.58
A 2	748	1	4	4	3.91
A 2	748	2	4	1	2
A 2	748	2	4	2	3.27
A 2	748	2	4	3	3.17
A 2	748	2	4	4	2.1
A 2	748	3	4	1	2.91
A 2	748	3	4	2	3.18
A 2	748	3	4	3	3.61
A 2	748	3	4	4	2.39
A 2	9401	1	4	1	18.69
A 2	9401	1	4	2	20.42
A 2	9401	1	4	3	19.93
A 2	9401	1	4	4	20.94
A 2	9401	2	4	1	21.19
A 2	9401	2	4	2	17
A 2	9401	2	4	3	19.55
A 2	9401	2	4	4	21.19
A 2	9401	3	4	1	21.36
A 2	9401	3	4	2	22.84
A 2	9401	3	4	3	24.01
A 2	9401	3	4	4	21.36
A 2	9174	1	4	1	16.15
A 2	9174	1	4	2	16.8
A 2	9174	1	4	3	18.36
A 2	9174	1	4	4	18.24
A 2	9174	2	4	1	17.52
A 2	9174	2	4	2	15.05
A 2	9174	2	4	3	18.11
A 2	9174	2	4	4	18.72
A 2	9174	3	4	1	20.11
A 2	9174	3	4	2	17.93
A 2	9174	3	4	3	17.73
A 2	9174	3	4	4	15.34
A 2	9732	1	4	1	2.21
A 2	9732	1	4	2	2.08
A 2	9732	1	4	3	2.38
A 2	9732	1	4	4	3.24
A 2	9732	2	4	1	1.5
A 2	9732	2	4	2	1.95
A 2	9732	2	4	3	3.02
A 2	9732	2	4	4	1.9
A 2	9732	3	4	1	3.74
A 2	9732	3	4	2	3.31
A 2	9732	3	4	3	2.17
A 2	9732	3	4	4	1.7
A 2	9714	1	4	1	1.53
A 2	9714	1	4	2	2.33
A 2	9714	1	4	3	2.65
A 2	9714	1	4	4	2.66
A 2	9714	2	4	1	4.75
A 2	9714	2	4	2	2.02
A 2	9714	2	4	3	5.09
A 2	9714	2	4	4	4.14
A 2	9714	3	4	1	5
A 2	9714	3	4	2	5.06
A 2	9714	3	4	3	4.47
A 2	9714	3	4	4	3.26
A 2	0006	1	4	1	23.5
A 2	0006	1	4	2	22.07
A 2	0006	1	4	3	23.17
A 2	0006	1	4	4	21.27
A 2	0006	2	4	1	25
A 2	0006	2	4	2	22.03
A 2	0006	2	4	3	23.17
A 2	0006	2	4	4	21.27
A 2	0006	3	4	1	20.56
A 2	0006	3	4	2	19.4
A 2	0006	3	4	3	21.06
A 2	0006	3	4	4	24.48
A 2	254-2	1	4	1	8.9
A 2	254-2	1	4	2	6.12
A 2	254-2	1	4	3	10
A 2	254-2	1	4	4	7.3
A 2	254-2	2	4	1	9.5
A 2	254-2	2	4	2	11
A 2	254-2	2	4	3	9.7
A 2	254-2	2	4	4	8.2
A 2	254-2	3	4	1	14.56
A 2	254-2	3	4	2	14
A 2	254-2	3	4	3	13.7
A 2	254-2	3	4	4	14.28
A 2	254-8	1	4	1	16.55
A 2	254-8	1	4	2	15.63
A 2	254-8	1	4	3	16.14
A 2	254-8	1	4	4	18.38
A 2	254-8	2	4	1	17.02
A 2	254-8	2	4	2	16.03
A 2	254-8	2	4	3	12.37
A 2	254-8	2	4	4	13.88
A 2	254-8	3	4	1	16.07
A 2	254-8	3	4	2	16.24
A 2	254-8	3	4	3	17.39
A 2	254-8	3	4	4	17.24
A 2	254-11	1	4	1	22.58
A 2	254-11	1	4	2	19.9
A 2	254-11	1	4	3	18.89
A 2	254-11	1	4	4	21.17
A 2	254-11	2	4	1	21.17
A 2	254-11	2	4	2	18.07
A 2	254-11	2	4	3	16.25
A 2	254-11	2	4	4	21.67
A 2	254-11	3	4	1	21.2
A 2	254-11	3	4	2	20
A 2	254-11	3	4	3	21.04
A 2	254-11	3	4	4	20.43
A 3	9610	1	4	1	3.07
A 3	9610	1	4	2	4.07
A 3	9610	1	4	3	1.9
A 3	9610	1	4	4	3.12
A 3	9610	2	4	1	3.78
A 3	9610	2	4	2	7.27
A 3	9610	2	4	3	4.65
A 3	9610	2	4	4	5.18
A 3	9610	3	4	1	6.22
A 3	9610	3	4	2	5.05
A 3	9610	3	4	3	4.54
A 3	9610	3	4	4	4.98
A 3	9612	1	4	1	4.04
A 3	9612	1	4	2	6.17
A 3	9612	1	4	3	2.79
A 3	9612	1	4	4	3.02
A 3	9612	2	4	1	3.74
A 3	9612	2	4	2	3.72
A 3	9612	2	4	3	5.16
A 3	9612	2	4	4	5.39
A 3	9612	3	4	1	11.57
A 3	9612	3	4	2	7.59
A 3	9612	3	4	3	3.86
A 3	9612	3	4	4	3.38
A 3	9605	1	4	1	3.05
A 3	9605	1	4	2	5.72
A 3	9605	1	4	3	3.08
A 3	9605	1	4	4	7.81
A 3	9605	2	4	1	3.56
A 3	9605	2	4	2	3.8
A 3	9605	2	4	3	7.8
A 3	9605	2	4	4	4.02
A 3	9605	3	4	1	2.6
A 3	9605	3	4	2	10.6
A 3	9605	3	4	3	5.8
A 3	9605	3	4	4	4.9
A 3	748	1	4	1	19
A 3	748	1	4	2	18.7
A 3	748	1	4	3	18.4
A 3	748	1	4	4	16.38
A 3	748	2	4	1	19
A 3	748	2	4	2	20.26
A 3	748	2	4	3	20.6
A 3	748	2	4	4	10.5
A 3	748	3	4	1	19
A 3	748	3	4	2	15
A 3	748	3	4	3	15.8
A 3	748	3	4	4	16.7
A 3	9401	1	4	1	12.2
A 3	9401	1	4	2	13.6
A 3	9401	1	4	3	18.2
A 3	9401	1	4	4	15.1
A 3	9401	2	4	1	14.8
A 3	9401	2	4	2	10.8
A 3	9401	2	4	3	13.3
A 3	9401	2	4	4	12.7
A 3	9401	3	4	1	13.6
A 3	9401	3	4	2	13.5
A 3	9401	3	4	3	11.3
A 3	9401	3	4	4	13.4
A 3	9174	1	4	1	12.7
A 3	9174	1	4	2	10.91
A 3	9174	1	4	3	8.27
A 3	9174	1	4	4	11.85
A 3	9174	2	4	1	9.96
A 3	9174	2	4	2	10.53
A 3	9174	2	4	3	10.95
A 3	9174	2	4	4	8.58
A 3	9174	3	4	1	12.34
A 3	9174	3	4	2	10.59
A 3	9174	3	4	3	9.65
A 3	9174	3	4	4	11.98
A 3	9732	1	4	1	3
A 3	9732	1	4	2	2.39
A 3	9732	1	4	3	6.97
A 3	9732	1	4	4	7.2
A 3	9732	2	4	1	4.77
A 3	9732	2	4	2	1.55
A 3	9732	2	4	3	4
A 3	9732	2	4	4	2
A 3	9732	3	4	1	3.6
A 3	9732	3	4	2	3.24
A 3	9732	3	4	3	2.05
A 3	9732	3	4	4	1.86
A 3	9714	1	4	1	7.59
A 3	9714	1	4	2	5.63
A 3	9714	1	4	3	5.43
A 3	9714	1	4	4	5.91
A 3	9714	2	4	1	2.59
A 3	9714	2	4	2	7.28
A 3	9714	2	4	3	2.7
A 3	9714	2	4	4	2.41
A 3	9714	3	4	1	5.19
A 3	9714	3	4	2	6.76
A 3	9714	3	4	3	3.1
A 3	9714	3	4	4	3.87
A 3	0006	1	4	1	20
A 3	0006	1	4	2	19
A 3	0006	1	4	3	21.07
A 3	0006	1	4	4	19.47
A 3	0006	2	4	1	21.92
A 3	0006	2	4	2	20.85
A 3	0006	2	4	3	21.96
A 3	0006	2	4	4	20.81
A 3	0006	3	4	1	20.08
A 3	0006	3	4	2	19.24
A 3	0006	3	4	3	22.97
A 3	0006	3	4	4	22.28
A 3	254-2	1	4	1	12.53
A 3	254-2	1	4	2	11.84
A 3	254-2	1	4	3	12.06
A 3	254-2	1	4	4	12.83
A 3	254-2	2	4	1	15.87
A 3	254-2	2	4	2	15.1
A 3	254-2	2	4	3	18.25
A 3	254-2	2	4	4	11.6
A 3	254-2	3	4	1	14.6
A 3	254-2	3	4	2	16.6
A 3	254-2	3	4	3	13.7
A 3	254-2	3	4	4	15.76
A 3	254-8	1	4	1	15.8
A 3	254-8	1	4	2	12.3
A 3	254-8	1	4	3	12.8
A 3	254-8	1	4	4	12.67
A 3	254-8	2	4	1	15.12
A 3	254-8	2	4	2	14.15
A 3	254-8	2	4	3	13.5
A 3	254-8	2	4	4	14.74
A 3	254-8	3	4	1	12.08
A 3	254-8	3	4	2	13.57
A 3	254-8	3	4	3	11.15
A 3	254-8	3	4	4	11.76
A 3	254-11	1	4	1	17.3
A 3	254-11	1	4	2	15.9
A 3	254-11	1	4	3	17.4
A 3	254-11	1	4	4	17.05
A 3	254-11	2	4	1	17.3
A 3	254-11	2	4	2	16.5
A 3	254-11	2	4	3	16.1
A 3	254-11	2	4	4	18.53
A 3	254-11	3	4	1	14.12
A 3	254-11	3	4	2	15.17
A 3	254-11	3	4	3	14.44
A 3	254-11	3	4	4	14.67
LA 3	9610	1	4	1	8.62
LA 3	9610	1	4	2	8.69
LA 3	9610	1	4	3	7.38
LA 3	9610	1	4	4	8.6
LA 3	9610	2	4	1	7.62
LA 3	9610	2	4	2	5.3
LA 3	9610	2	4	3	4.28
LA 3	9610	2	4	4	7.43
LA 3	9610	3	4	1	7.53
LA 3	9610	3	4	2	5.77
LA 3	9610	3	4	3	6.54
LA 3	9610	3	4	4	7.72
LA 3	9612	1	4	1	3.81
LA 3	9612	1	4	2	4.27
LA 3	9612	1	4	3	3.12
LA 3	9612	1	4	4	4.02
LA 3	9612	2	4	1	5.55
LA 3	9612	2	4	2	4.8
LA 3	9612	2	4	3	5.69
LA 3	9612	2	4	4	6.08
LA 3	9612	3	4	1	6.6
LA 3	9612	3	4	2	5.65
LA 3	9612	3	4	3	6.04
LA 3	9612	3	4	4	7.37
LA 3	9605	1	4	1	4.05
LA 3	9605	1	4	2	4.07
LA 3	9605	1	4	3	4.47
LA 3	9605	1	4	4	6.14
LA 3	9605	2	4	1	3.85
LA 3	9605	2	4	2	3.53
LA 3	9605	2	4	3	3.74
LA 3	9605	2	4	4	3.23
LA 3	9605	3	4	1	3.61
LA 3	9605	3	4	2	3.5
LA 3	9605	3	4	3	3.63
LA 3	9605	3	4	4	3.92
LA 3	748	1	4	1	11.26
LA 3	748	1	4	2	10.15
LA 3	748	1	4	3	10.92
LA 3	748	1	4	4	10.61
LA 3	748	2	4	1	11
LA 3	748	2	4	2	9.65
LA 3	748	2	4	3	10.7
LA 3	748	2	4	4	11.92
LA 3	748	3	4	1	10.56
LA 3	748	3	4	2	10.65
LA 3	748	3	4	3	10.58
LA 3	748	3	4	4	12.11
LA 3	9401	1	4	1	18.75
LA 3	9401	1	4	2	16.71
LA 3	9401	1	4	3	18.04
LA 3	9401	1	4	4	19.8
LA 3	9401	2	4	1	15.25
LA 3	9401	2	4	2	17.9
LA 3	9401	2	4	3	16.25
LA 3	9401	2	4	4	19
LA 3	9401	3	4	1	21.3
LA 3	9401	3	4	2	15.84
LA 3	9401	3	4	3	17.96
LA 3	9401	3	4	4	17.93
LA 3	9174	1	4	1	10.7
LA 3	9174	1	4	2	9.84
LA 3	9174	1	4	3	9.27
LA 3	9174	1	4	4	10.6
LA 3	9174	2	4	1	12.07
LA 3	9174	2	4	2	12.93
LA 3	9174	2	4	3	11.95
LA 3	9174	2	4	4	12.83
LA 3	9174	3	4	1	11.5
LA 3	9174	3	4	2	11.08
LA 3	9174	3	4	3	11.7
LA 3	9174	3	4	4	11.24
LA 3	9732	1	4	1	2.25
LA 3	9732	1	4	2	2.85
LA 3	9732	1	4	3	2.32
LA 3	9732	1	4	4	2.63
LA 3	9732	2	4	1	2.65
LA 3	9732	2	4	2	3.26
LA 3	9732	2	4	3	4.57
LA 3	9732	2	4	4	1.5
LA 3	9732	3	4	1	3.74
LA 3	9732	3	4	2	1.86
LA 3	9732	3	4	3	3.85
LA 3	9732	3	4	4	3.86
LA 3	9714	1	4	1	2.18
LA 3	9714	1	4	2	2.68
LA 3	9714	1	4	3	3.15
LA 3	9714	1	4	4	2.98
LA 3	9714	2	4	1	0.96
LA 3	9714	2	4	2	2.27
LA 3	9714	2	4	3	3.92
LA 3	9714	2	4	4	4.66
LA 3	9714	3	4	1	0.96
LA 3	9714	3	4	2	2.27
LA 3	9714	3	4	3	3.92
LA 3	9714	3	4	4	4.66
LA 3	0006	1	4	1	9.44
LA 3	0006	1	4	2	8.58
LA 3	0006	1	4	3	9.02
LA 3	0006	1	4	4	8.96
LA 3	0006	2	4	1	9.78
LA 3	0006	2	4	2	9.42
LA 3	0006	2	4	3	9.68
LA 3	0006	2	4	4	10.25
LA 3	0006	3	4	1	10.49
LA 3	0006	3	4	2	9.02
LA 3	0006	3	4	3	8.79
LA 3	0006	3	4	4	9.28
LA 3	254-2	1	4	1	9.02
LA 3	254-2	1	4	2	8.25
LA 3	254-2	1	4	3	7.66
LA 3	254-2	1	4	4	7.84
LA 3	254-2	2	4	1	8.08
LA 3	254-2	2	4	2	7.99
LA 3	254-2	2	4	3	6.59
LA 3	254-2	2	4	4	8.71
LA 3	254-2	3	4	1	8.64
LA 3	254-2	3	4	2	9.39
LA 3	254-2	3	4	3	9.79
LA 3	254-2	3	4	4	8.66
LA 3	254-8	1	4	1	9.79
LA 3	254-8	1	4	2	10.3
LA 3	254-8	1	4	3	9.73
LA 3	254-8	1	4	4	9.65
LA 3	254-8	2	4	1	9.25
LA 3	254-8	2	4	2	8.75
LA 3	254-8	2	4	3	9.2
LA 3	254-8	2	4	4	9.75
LA 3	254-8	3	4	1	11.52
LA 3	254-8	3	4	2	9.81
LA 3	254-8	3	4	3	10
LA 3	254-8	3	4	4	9.83
LA 3	254-11	1	4	1	10.45
LA 3	254-11	1	4	2	10.62
LA 3	254-11	1	4	3	9.95
LA 3	254-11	1	4	4	10.68
LA 3	254-11	2	4	1	9.44
LA 3	254-11	2	4	2	7.52
LA 3	254-11	2	4	3	10.62
LA 3	254-11	2	4	4	8.67
LA 3	254-11	3	4	1	9.06
LA 3	254-11	3	4	2	9.61
LA 3	254-11	3	4	3	10.07
LA 3	254-11	3	4	4	10.66
LA 1	9610	1	4	1	8.25
LA 1	9610	1	4	2	10.38
LA 1	9610	1	4	3	6.11
LA 1	9610	1	4	4	7.65
LA 1	9610	2	4	1	10.84
LA 1	9610	2	4	2	11.57
LA 1	9610	2	4	3	10.83
LA 1	9610	2	4	4	10
LA 1	9610	3	4	1	5.3
LA 1	9610	3	4	2	2.3
LA 1	9610	3	4	3	4.6
LA 1	9610	3	4	4	9.7
LA 1	9612	1	4	1	5.35
LA 1	9612	1	4	2	5.24
LA 1	9612	1	4	3	5.31
LA 1	9612	1	4	4	5.89
LA 1	9612	2	4	1	4.84
LA 1	9612	2	4	2	4.86
LA 1	9612	2	4	3	3.31
LA 1	9612	2	4	4	4.75
LA 1	9612	3	4	1	4.9
LA 1	9612	3	4	2	4.43
LA 1	9612	3	4	3	4.56
LA 1	9612	3	4	4	3.83
LA 1	9605	1	4	1	8.76
LA 1	9605	1	4	2	8.38
LA 1	9605	1	4	3	11.41
LA 1	9605	1	4	4	8.48
LA 1	9605	2	4	1	7.16
LA 1	9605	2	4	2	8.75
LA 1	9605	2	4	3	9.14
LA 1	9605	2	4	4	7.04
LA 1	9605	3	4	1	10.06
LA 1	9605	3	4	2	9.16
LA 1	9605	3	4	3	10.03
LA 1	9605	3	4	4	5.43
LA 1	748	1	4	1	3.99
LA 1	748	1	4	2	1.18
LA 1	748	1	4	3	3.14
LA 1	748	1	4	4	3.55
LA 1	748	2	4	1	5.12
LA 1	748	2	4	2	1.88
LA 1	748	2	4	3	4.39
LA 1	748	2	4	4	3.75
LA 1	748	3	4	1	2.65
LA 1	748	3	4	2	2.84
LA 1	748	3	4	3	2.06
LA 1	748	3	4	4	2.45
LA 1	9401	1	4	1	18.14
LA 1	9401	1	4	2	17.86
LA 1	9401	1	4	3	16.67
LA 1	9401	1	4	4	14.83
LA 1	9401	2	4	1	11.16
LA 1	9401	2	4	2	15.42
LA 1	9401	2	4	3	13.63
LA 1	9401	2	4	4	14.78
LA 1	9401	3	4	1	13.74
LA 1	9401	3	4	2	17.83
LA 1	9401	3	4	3	16.12
LA 1	9401	3	4	4	15.08
LA 1	9174	1	4	1	10.3
LA 1	9174	1	4	2	11.5
LA 1	9174	1	4	3	11.57
LA 1	9174	1	4	4	10.09
LA 1	9174	2	4	1	10.48
LA 1	9174	2	4	2	9.46
LA 1	9174	2	4	3	10.91
LA 1	9174	2	4	4	13.24
LA 1	9174	3	4	1	10.44
LA 1	9174	3	4	2	12.67
LA 1	9174	3	4	3	11.16
LA 1	9174	3	4	4	12
LA 1	9732	1	4	1	3.28
LA 1	9732	1	4	2	3.53
LA 1	9732	1	4	3	3.03
LA 1	9732	1	4	4	3.38
LA 1	9732	2	4	1	3.34
LA 1	9732	2	4	2	3.48
LA 1	9732	2	4	3	3.61
LA 1	9732	2	4	4	3.06
LA 1	9732	3	4	1	2.79
LA 1	9732	3	4	2	2.86
LA 1	9732	3	4	3	3.05
LA 1	9732	3	4	4	2.85
LA 1	9714	1	4	1	5.21
LA 1	9714	1	4	2	4.73
LA 1	9714	1	4	3	6.24
LA 1	9714	1	4	4	7.66
LA 1	9714	2	4	1	7.11
LA 1	9714	2	4	2	7.71
LA 1	9714	2	4	3	5.23
LA 1	9714	2	4	4	5.9
LA 1	9714	3	4	1	7.72
LA 1	9714	3	4	2	4.49
LA 1	9714	3	4	3	4.53
LA 1	9714	3	4	4	6.35
LA 1	0006	1	4	1	13.37
LA 1	0006	1	4	2	14.69
LA 1	0006	1	4	3	16.76
LA 1	0006	1	4	4	15.93
LA 1	0006	2	4	1	13.98
LA 1	0006	2	4	2	15.04
LA 1	0006	2	4	3	16.55
LA 1	0006	2	4	4	13.01
LA 1	0006	3	4	1	15.24
LA 1	0006	3	4	2	16.34
LA 1	0006	3	4	3	16.09
LA 1	0006	3	4	4	15.04
LA 1	254-2	1	4	1	14.92
LA 1	254-2	1	4	2	10.65
LA 1	254-2	1	4	3	12.74
LA 1	254-2	1	4	4	13.32
LA 1	254-2	2	4	1	12.52
LA 1	254-2	2	4	2	15.01
LA 1	254-2	2	4	3	13.13
LA 1	254-2	2	4	4	13.38
LA 1	254-2	3	4	1	16.54
LA 1	254-2	3	4	2	16.23
LA 1	254-2	3	4	3	14.87
LA 1	254-2	3	4	4	15.63
LA 1	254-8	1	4	1	16.24
LA 1	254-8	1	4	2	14.43
LA 1	254-8	1	4	3	15.45
LA 1	254-8	1	4	4	13.83
LA 1	254-8	2	4	1	13.81
LA 1	254-8	2	4	2	14.63
LA 1	254-8	2	4	3	13.94
LA 1	254-8	2	4	4	14.23
LA 1	254-8	3	4	1	14.61
LA 1	254-8	3	4	2	17.95
LA 1	254-8	3	4	3	17.62
LA 1	254-8	3	4	4	21.13
LA 1	254-11	1	4	1	10.72
LA 1	254-11	1	4	2	9.03
LA 1	254-11	1	4	3	10.68
LA 1	254-11	1	4	4	10.11
LA 1	254-11	2	4	1	11.9
LA 1	254-11	2	4	2	15.44
LA 1	254-11	2	4	3	12.91
LA 1	254-11	2	4	4	14.73
LA 1	254-11	3	4	1	15.12
LA 1	254-11	3	4	2	15.94
LA 1	254-11	3	4	3	17.83
LA 1	254-11	3	4	4	15.51
LA 2	9610	1	4	1	9.6
LA 2	9610	1	4	2	7.64
LA 2	9610	1	4	3	8.29
LA 2	9610	1	4	4	4.84
LA 2	9610	2	4	1	5.25
LA 2	9610	2	4	2	8.66
LA 2	9610	2	4	3	7.64
LA 2	9610	2	4	4	7.33
LA 2	9610	3	4	1	9.39
LA 2	9610	3	4	2	8.16
LA 2	9610	3	4	3	5.11
LA 2	9610	3	4	4	9.84
LA 2	9612	1	4	1	6.46
LA 2	9612	1	4	2	6.1
LA 2	9612	1	4	3	7.18
LA 2	9612	1	4	4	6.27
LA 2	9612	2	4	1	6.93
LA 2	9612	2	4	2	6.25
LA 2	9612	2	4	3	6.47
LA 2	9612	2	4	4	6.91
LA 2	9612	3	4	1	4.75
LA 2	9612	3	4	2	6.15
LA 2	9612	3	4	3	5.83
LA 2	9612	3	4	4	7.62
LA 2	9605	1	4	1	5.28
LA 2	9605	1	4	2	7.16
LA 2	9605	1	4	3	3.68
LA 2	9605	1	4	4	3.52
LA 2	9605	2	4	1	3.51
LA 2	9605	2	4	2	5.7
LA 2	9605	2	4	3	7.15
LA 2	9605	2	4	4	8.07
LA 2	9605	3	4	1	5.37
LA 2	9605	3	4	2	5.79
LA 2	9605	3	4	3	10.21
LA 2	9605	3	4	4	7.85
LA 2	748	1	4	1	6.41
LA 2	748	1	4	2	7.23
LA 2	748	1	4	3	6.95
LA 2	748	1	4	4	6.74
LA 2	748	2	4	1	5.42
LA 2	748	2	4	2	7.46
LA 2	748	2	4	3	7.39
LA 2	748	2	4	4	5.08
LA 2	748	3	4	1	4.08
LA 2	748	3	4	2	4.64
LA 2	748	3	4	3	4.29
LA 2	748	3	4	4	5.43
LA 2	9401	1	4	1	16.3
LA 2	9401	1	4	2	14.5
LA 2	9401	1	4	3	14.2
LA 2	9401	1	4	4	18.2
LA 2	9401	2	4	1	16.74
LA 2	9401	2	4	2	17.39
LA 2	9401	2	4	3	16.51
LA 2	9401	2	4	4	13.82
LA 2	9401	3	4	1	17
LA 2	9401	3	4	2	15.23
LA 2	9401	3	4	3	16.02
LA 2	9401	3	4	4	16.48
LA 2	9174	1	4	1	12.45
LA 2	9174	1	4	2	11.53
LA 2	9174	1	4	3	13.81
LA 2	9174	1	4	4	12.83
LA 2	9174	2	4	1	11.72
LA 2	9174	2	4	2	14.63
LA 2	9174	2	4	3	16.3
LA 2	9174	2	4	4	15.38
LA 2	9174	3	4	1	12.11
LA 2	9174	3	4	2	12.84
LA 2	9174	3	4	3	12.13
LA 2	9174	3	4	4	12.74
LA 2	9732	1	4	1	1.72
LA 2	9732	1	4	2	1.44
LA 2	9732	1	4	3	1.95
LA 2	9732	1	4	4	1.6
LA 2	9732	2	4	1	2.05
LA 2	9732	2	4	2	2.79
LA 2	9732	2	4	3	2.97
LA 2	9732	2	4	4	2.92
LA 2	9732	3	4	1	2.53
LA 2	9732	3	4	2	2.84
LA 2	9732	3	4	3	3.06
LA 2	9732	3	4	4	2.82
LA 2	9714	1	4	1	2.89
LA 2	9714	1	4	2	3.06
LA 2	9714	1	4	3	3.24
LA 2	9714	1	4	4	3.18
LA 2	9714	2	4	1	6.7
LA 2	9714	2	4	2	4.55
LA 2	9714	2	4	3	6.28
LA 2	9714	2	4	4	7.38
LA 2	9714	3	4	1	1.59
LA 2	9714	3	4	2	5.77
LA 2	9714	3	4	3	7.13
LA 2	9714	3	4	4	4.31
LA 2	0006	1	4	1	12.06
LA 2	0006	1	4	2	11.14
LA 2	0006	1	4	3	14.06
LA 2	0006	1	4	4	12.83
LA 2	0006	2	4	1	15.07
LA 2	0006	2	4	2	14.15
LA 2	0006	2	4	3	14.49
LA 2	0006	2	4	4	15.25
LA 2	0006	3	4	1	14.68
LA 2	0006	3	4	2	13.94
LA 2	0006	3	4	3	14.03
LA 2	0006	3	4	4	12.8
LA 2	254-2	1	4	1	10.93
LA 2	254-2	1	4	2	8.43
LA 2	254-2	1	4	3	10.21
LA 2	254-2	1	4	4	10.14
LA 2	254-2	2	4	1	10.96
LA 2	254-2	2	4	2	10.11
LA 2	254-2	2	4	3	10.19
LA 2	254-2	2	4	4	11.68
LA 2	254-2	3	4	1	12.81
LA 2	254-2	3	4	2	11.06
LA 2	254-2	3	4	3	9.3
LA 2	254-2	3	4	4	10.65
LA 2	254-8	1	4	1	9.7
LA 2	254-8	1	4	2	7.9
LA 2	254-8	1	4	3	8.75
LA 2	254-8	1	4	4	8.86
LA 2	254-8	2	4	1	11.87
LA 2	254-8	2	4	2	10.52
LA 2	254-8	2	4	3	10.9
LA 2	254-8	2	4	4	10.19
LA 2	254-8	3	4	1	9.47
LA 2	254-8	3	4	2	10.72
LA 2	254-8	3	4	3	9.36
LA 2	254-8	3	4	4	11.97
LA 2	254-11	1	4	1	11.58
LA 2	254-11	1	4	2	10.62
LA 2	254-11	1	4	3	9.82
LA 2	254-11	1	4	4	10.78
LA 2	254-11	2	4	1	11.68
LA 2	254-11	2	4	2	10.54
LA 2	254-11	2	4	3	9.87
LA 2	254-11	2	4	4	10.7
LA 2	254-11	3	4	1	6.07
LA 2	254-11	3	4	2	10.56
LA 2	254-11	3	4	3	10.73
LA 2	254-11	3	4	4	12.91
L 1	9610	1	4	1	2.95
L 1	9610	1	4	2	2.66
L 1	9610	1	4	3	4.5
L 1	9610	1	4	4	4.62
L 1	9610	2	4	1	5.24
L 1	9610	2	4	2	3.12
L 1	9610	2	4	3	3.8
L 1	9610	2	4	4	3.24
L 1	9610	3	4	1	2.23
L 1	9610	3	4	2	2.46
L 1	9610	3	4	3	2.37
L 1	9610	3	4	4	4.15
L 1	9612	1	4	1	3.41
L 1	9612	1	4	2	3.25
L 1	9612	1	4	3	2.65
L 1	9612	1	4	4	3.69
L 1	9612	2	4	1	2.68
L 1	9612	2	4	2	1.94
L 1	9612	2	4	3	2.94
L 1	9612	2	4	4	1.74
L 1	9612	3	4	1	2.37
L 1	9612	3	4	2	1.87
L 1	9612	3	4	3	2.6
L 1	9612	3	4	4	2.92
L 1	9605	1	4	1	3.28
L 1	9605	1	4	2	4.46
L 1	9605	1	4	3	3.39
L 1	9605	1	4	4	2.24
L 1	9605	2	4	1	3.08
L 1	9605	2	4	2	2.46
L 1	9605	2	4	3	3.26
L 1	9605	2	4	4	3.05
L 1	9605	3	4	1	4.7
L 1	9605	3	4	2	3.85
L 1	9605	3	4	3	3.93
L 1	9605	3	4	4	2.88
L 1	748	1	4	1	4.83
L 1	748	1	4	2	4.69
L 1	748	1	4	3	4.68
L 1	748	1	4	4	5.41
L 1	748	2	4	1	4.18
L 1	748	2	4	2	4.16
L 1	748	2	4	3	5.12
L 1	748	2	4	4	5.79
L 1	748	3	4	1	5.64
L 1	748	3	4	2	4.76
L 1	748	3	4	3	4.5
L 1	748	3	4	4	5.92
L 1	9401	1	4	1	9.48
L 1	9401	1	4	2	8.65
L 1	9401	1	4	3	4.57
L 1	9401	1	4	4	4.69
L 1	9401	2	4	1	3.94
L 1	9401	2	4	2	3.87
L 1	9401	2	4	3	3.64
L 1	9401	2	4	4	3.79
L 1	9401	3	4	1	4.8
L 1	9401	3	4	2	3.38
L 1	9401	3	4	3	2.97
L 1	9401	3	4	4	4.65
L 1	9174	1	4	1	2.7
L 1	9174	1	4	2	3.12
L 1	9174	1	4	3	3.4
L 1	9174	1	4	4	2.88
L 1	9174	2	4	1	3.67
L 1	9174	2	4	2	3.04
L 1	9174	2	4	3	3.24
L 1	9174	2	4	4	4.25
L 1	9174	3	4	1	2.5
L 1	9174	3	4	2	4.18
L 1	9174	3	4	3	2.93
L 1	9174	3	4	4	5.13
L 1	9732	1	4	1	4.08
L 1	9732	1	4	2	2.6
L 1	9732	1	4	3	3.17
L 1	9732	1	4	4	3.53
L 1	9732	2	4	1	3.02
L 1	9732	2	4	2	2.21
L 1	9732	2	4	3	2.31
L 1	9732	2	4	4	2.64
L 1	9732	3	4	1	1.3
L 1	9732	3	4	2	1.64
L 1	9732	3	4	3	1.73
L 1	9732	3	4	4	2.24
L 1	9714	1	4	1	1.03
L 1	9714	1	4	2	1.64
L 1	9714	1	4	3	2.83
L 1	9714	1	4	4	2.14
L 1	9714	2	4	1	0.9
L 1	9714	2	4	2	4.13
L 1	9714	2	4	3	2.84
L 1	9714	2	4	4	2.54
L 1	9714	3	4	1	4.45
L 1	9714	3	4	2	4.03
L 1	9714	3	4	3	2.24
L 1	9714	3	4	4	3.78
L 1	0006	1	4	1	3.83
L 1	0006	1	4	2	4.24
L 1	0006	1	4	3	4.29
L 1	0006	1	4	4	3.47
L 1	0006	2	4	1	6.03
L 1	0006	2	4	2	3.96
L 1	0006	2	4	3	4.38
L 1	0006	2	4	4	5.77
L 1	0006	3	4	1	4.51
L 1	0006	3	4	2	4.5
L 1	0006	3	4	3	3.18
L 1	0006	3	4	4	4.74
L 1	254-2	1	4	1	3.06
L 1	254-2	1	4	2	1.45
L 1	254-2	1	4	3	4.05
L 1	254-2	1	4	4	1.08
L 1	254-2	2	4	1	2.94
L 1	254-2	2	4	2	2.63
L 1	254-2	2	4	3	1.61
L 1	254-2	2	4	4	2.5
L 1	254-2	3	4	1	3.85
L 1	254-2	3	4	2	1.68
L 1	254-2	3	4	3	2.73
L 1	254-2	3	4	4	3.42
L 1	254-8	1	4	1	5.7
L 1	254-8	1	4	2	4.35
L 1	254-8	1	4	3	2.95
L 1	254-8	1	4	4	4.67
L 1	254-8	2	4	1	6.63
L 1	254-8	2	4	2	6.77
L 1	254-8	2	4	3	5.58
L 1	254-8	2	4	4	5.23
L 1	254-8	3	4	1	4.95
L 1	254-8	3	4	2	3.96
L 1	254-8	3	4	3	3.16
L 1	254-8	3	4	4	6.53
L 1	254-11	1	4	1	7.74
L 1	254-11	1	4	2	9.12
L 1	254-11	1	4	3	7.75
L 1	254-11	1	4	4	7.37
L 1	254-11	2	4	1	8.28
L 1	254-11	2	4	2	8.95
L 1	254-11	2	4	3	9.24
L 1	254-11	2	4	4	7.52
L 1	254-11	3	4	1	6.73
L 1	254-11	3	4	2	8.66
L 1	254-11	3	4	3	7.61
L 1	254-11	3	4	4	7.1
L 2	9610	1	4	1	4.05
L 2	9610	1	4	2	5.14
L 2	9610	1	4	3	4.52
L 2	9610	1	4	4	4.81
L 2	9610	2	4	1	3.45
L 2	9610	2	4	2	3.31
L 2	9610	2	4	3	3.59
L 2	9610	2	4	4	4.9
L 2	9610	3	4	1	3.14
L 2	9610	3	4	2	3.51
L 2	9610	3	4	3	4.43
L 2	9610	3	4	4	3.25
L 2	9612	1	4	1	3.04
L 2	9612	1	4	2	2.78
L 2	9612	1	4	3	2.86
L 2	9612	1	4	4	3.37
L 2	9612	2	4	1	2.56
L 2	9612	2	4	2	2.37
L 2	9612	2	4	3	2.7
L 2	9612	2	4	4	2.43
L 2	9612	3	4	1	2.39
L 2	9612	3	4	2	2.34
L 2	9612	3	4	3	2.91
L 2	9612	3	4	4	2.66
L 2	9605	1	4	1	5.58
L 2	9605	1	4	2	4.25
L 2	9605	1	4	3	4.15
L 2	9605	1	4	4	4.97
L 2	9605	2	4	1	3.67
L 2	9605	2	4	2	2.4
L 2	9605	2	4	3	3.57
L 2	9605	2	4	4	5.12
L 2	9605	3	4	1	3.64
L 2	9605	3	4	2	3.04
L 2	9605	3	4	3	2.97
L 2	9605	3	4	4	5.09
L 2	748	1	4	1	4.28
L 2	748	1	4	2	3.88
L 2	748	1	4	3	4.67
L 2	748	1	4	4	4.9
L 2	748	2	4	1	4.82
L 2	748	2	4	2	4.69
L 2	748	2	4	3	4.22
L 2	748	2	4	4	4.74
L 2	748	3	4	1	3.64
L 2	748	3	4	2	3.59
L 2	748	3	4	3	4.07
L 2	748	3	4	4	3.93
L 2	9401	1	4	1	6.58
L 2	9401	1	4	2	9.81
L 2	9401	1	4	3	9.93
L 2	9401	1	4	4	13.61
L 2	9401	2	4	1	6.25
L 2	9401	2	4	2	4
L 2	9401	2	4	3	8.37
L 2	9401	2	4	4	6.51
L 2	9401	3	4	1	5.14
L 2	9401	3	4	2	4.5
L 2	9401	3	4	3	6.75
L 2	9401	3	4	4	5.11
L 2	9174	1	4	1	4.38
L 2	9174	1	4	2	4.57
L 2	9174	1	4	3	5.28
L 2	9174	1	4	4	4.47
L 2	9174	2	4	1	4.04
L 2	9174	2	4	2	2.4
L 2	9174	2	4	3	5.12
L 2	9174	2	4	4	3.88
L2	9174	3	4	1	4.37
L 2	9174	3	4	2	3.1
L 2	9174	3	4	3	4.54
L 2	9174	3	4	4	3.9
L 2	9732	1	4	1	1.49
L 2	9732	1	4	2	1.98
L 2	9732	1	4	3	2.04
L 2	9732	1	4	4	3.25
L 2	9732	2	4	1	1.78
L 2	9732	2	4	2	2.61
L 2	9732	2	4	3	1.96
L 2	9732	2	4	4	1.68
L 2	9732	3	4	1	1.54
L 2	9732	3	4	2	2.11
L 2	9732	3	4	3	1.5
L 2	9732	3	4	4	2.33
L 2	9714	1	4	1	2.29
L 2	9714	1	4	2	2.91
L 2	9714	1	4	3	2.35
L 2	9714	1	4	4	2.85
L 2	9714	2	4	1	3.57
L 2	9714	2	4	2	3.09
L 2	9714	2	4	3	2.89
L 2	9714	2	4	4	3.76
L 2	9714	3	4	1	1.07
L 2	9714	3	4	2	2.51
L 2	9714	3	4	3	3.29
L 2	9714	3	4	4	0
L 2	0006	1	4	1	4.55
L 2	0006	1	4	2	4.68
L 2	0006	1	4	3	4.43
L 2	0006	1	4	4	4.69
L 2	0006	2	4	1	4.13
L 2	0006	2	4	2	4.76
L 2	0006	2	4	3	5.02
L 2	0006	2	4	4	6.38
L 2	0006	3	4	1	5.37
L 2	0006	3	4	2	6.9
L 2	0006	3	4	3	6.7
L 2	0006	3	4	4	4.71
L 2	254-2	1	4	1	3.43
L 2	254-2	1	4	2	4.14
L 2	254-2	1	4	3	5.36
L 2	254-2	1	4	4	3.66
L 2	254-2	2	4	1	2.22
L 2	254-2	2	4	2	3.03
L 2	254-2	2	4	3	1.48
L 2	254-2	2	4	4	1.37
L 2	254-2	3	4	1	2.38
L 2	254-2	3	4	2	2.47
L 2	254-2	3	4	3	2.71
L 2	254-2	3	4	4	2.61
L 2	254-8	1	4	1	4.94
L 2	254-8	1	4	2	6.64
L 2	254-8	1	4	3	7.24
L 2	254-8	1	4	4	5.63
L 2	254-8	2	4	1	6.94
L 2	254-8	2	4	2	6.4
L 2	254-8	2	4	3	7.6
L 2	254-8	2	4	4	6.38
L 2	254-8	3	4	1	6.67
L 2	254-8	3	4	2	7.24
L 2	254-8	3	4	3	6.88
L 2	254-8	3	4	4	7.48
L 2	254-11	1	4	1	6.22
L 2	254-11	1	4	2	6.84
L 2	254-11	1	4	3	6.92
L 2	254-11	1	4	4	7.63
L 2	254-11	2	4	1	7.19
L 2	254-11	2	4	2	7.11
L 2	254-11	2	4	3	7.42
L 2	254-11	2	4	4	7.55
L 2	254-11	3	4	1	7.45
L 2	254-11	3	4	2	7.04
L 2	254-11	3	4	3	7.39
L 2	254-11	3	4	4	7.16
L 3	9610	1	4	1	3.95
L 3	9610	1	4	2	4.3
L 3	9610	1	4	3	3.78
L 3	9610	1	4	4	4.17
L 3	9610	2	4	1	3.96
L 3	9610	2	4	2	4.04
L 3	9610	2	4	3	4.25
L 3	9610	2	4	4	3.33
L 3	9610	3	4	1	3.98
L 3	9610	3	4	2	4.87
L 3	9610	3	4	3	5.14
L 3	9610	3	4	4	3.55
L 3	9612	1	4	1	4.11
L 3	9612	1	4	2	3.62
L 3	9612	1	4	3	3.94
L 3	9612	1	4	4	4.05
L 3	9612	2	4	1	3.83
L 3	9612	2	4	2	3.56
L 3	9612	2	4	3	3.62
L 3	9612	2	4	4	4.43
L 3	9612	3	4	1	3.97
L 3	9612	3	4	2	3.71
L 3	9612	3	4	3	3.5
L 3	9612	3	4	4	3.52
L 3	9605	1	4	1	5.34
L 3	9605	1	4	2	4.3
L 3	9605	1	4	3	2.1
L 3	9605	1	4	4	4.75
L 3	9605	2	4	1	5.06
L 3	9605	2	4	2	4.18
L 3	9605	2	4	3	4.64
L 3	9605	2	4	4	4.9
L 3	9605	3	4	1	4.01
L 3	9605	3	4	2	3.73
L 3	9605	3	4	3	4.39
L 3	9605	3	4	4	4.21
L 3	748	1	4	1	6.47
L 3	748	1	4	2	7.82
L 3	748	1	4	3	7.05
L 3	748	1	4	4	7.8
L 3	748	2	4	1	6.73
L 3	748	2	4	2	7.82
L 3	748	2	4	3	6.35
L 3	748	2	4	4	6.13
L 3	748	3	4	1	6.5
L 3	748	3	4	2	5.7
L 3	748	3	4	3	6.66
L 3	748	3	4	4	6.01
L 3	9401	1	4	1	10.08
L 3	9401	1	4	2	8.53
L 3	9401	1	4	3	10.02
L 3	9401	1	4	4	8.78
L 3	9401	2	4	1	10.14
L 3	9401	2	4	2	9.11
L 3	9401	2	4	3	10.08
L 3	9401	2	4	4	7.44
L 3	9401	3	4	1	10.94
L 3	9401	3	4	2	12.32
L 3	9401	3	4	3	9.94
L 3	9401	3	4	4	10.62
L 3	9174	1	4	1	6.54
L 3	9174	1	4	2	6.4
L 3	9174	1	4	3	4.52
L 3	9174	1	4	4	3.54
L 3	9174	2	4	1	3.93
L 3	9174	2	4	2	3.3
L 3	9174	2	4	3	5.12
L 3	9174	2	4	4	5.1
L 3	9174	3	4	1	3.47
L 3	9174	3	4	2	5.02
L 3	9174	3	4	3	5.82
L 3	9174	3	4	4	5.13
L 3	9732	1	4	1	5.35
L 3	9732	1	4	2	5.41
L 3	9732	1	4	3	5.28
L 3	9732	1	4	4	5.78
L 3	9732	2	4	1	4.96
L 3	9732	2	4	2	4.86
L 3	9732	2	4	3	5.4
L 3	9732	2	4	4	5.67
L 3	9732	3	4	1	4.2
L 3	9732	3	4	2	4.81
L 3	9732	3	4	3	4.92
L 3	9732	3	4	4	5.37
L 3	9714	1	4	1	3.73
L 3	9714	1	4	2	4.84
L 3	9714	1	4	3	4.72
L 3	9714	1	4	4	3.86
L 3	9714	2	4	1	5.67
L 3	9714	2	4	2	4.88
L 3	9714	2	4	3	5.89
L 3	9714	2	4	4	5.68
L 3	9714	3	4	1	3.51
L 3	9714	3	4	2	4.12
L 3	9714	3	4	3	3.93
L 3	9714	3	4	4	4.92
L 3	0006	1	4	1	6.06
L 3	0006	1	4	2	6.6
L 3	0006	1	4	3	5.15
L 3	0006	1	4	4	5.67
L 3	0006	2	4	1	6.8
L 3	0006	2	4	2	6.15
L 3	0006	2	4	3	6.91
L 3	0006	2	4	4	4.19
L 3	0006	3	4	1	6.27
L 3	0006	3	4	2	6.76
L 3	0006	3	4	3	6.7
L 3	0006	3	4	4	6.47
L 3	254-2	1	4	1	4.77
L 3	254-2	1	4	2	6.67
L 3	254-2	1	4	3	6.19
L 3	254-2	1	4	4	6.18
L 3	254-2	2	4	1	5.84
L 3	254-2	2	4	2	6.42
L 3	254-2	2	4	3	6.58
L 3	254-2	2	4	4	7.18
L 3	254-2	3	4	1	6.66
L 3	254-2	3	4	2	6.58
L 3	254-2	3	4	3	7.76
L 3	254-2	3	4	4	6.11
L 3	254-8	1	4	1	5.12
L 3	254-8	1	4	2	6.92
L 3	254-8	1	4	3	6.37
L 3	254-8	1	4	4	6.69
L 3	254-8	2	4	1	5.12
L 3	254-8	2	4	2	5.4
L 3	254-8	2	4	3	6.71
L 3	254-8	2	4	4	5.33
L 3	254-8	3	4	1	5.27
L 3	254-8	3	4	2	7.06
L 3	254-8	3	4	3	6.72
L 3	254-8	3	4	4	5.72
L 3	254-11	1	4	1	7.57
L 3	254-11	1	4	2	8.78
L 3	254-11	1	4	3	8.59
L 3	254-11	1	4	4	7.88
L 3	254-11	2	4	1	6.6
L 3	254-11	2	4	2	7.18
L 3	254-11	2	4	3	7.42
L 3	254-11	2	4	4	8.08
L 3	254-11	3	4	1	7.14
L 3	254-11	3	4	2	6.53
L 3	254-11	3	4	3	8
L 3	254-11	3	4	4	5.63
LO 2	9610	1	4	1	4.82
LO 2	9610	1	4	2	2.57
LO 2	9610	1	4	3	4.5
LO 2	9610	1	4	4	2.35
LO 2	9610	2	4	1	1.83
LO 2	9610	2	4	2	2.79
LO 2	9610	2	4	3	6.71
LO 2	9610	2	4	4	3.59
LO 2	9610	3	4	1	4.04
LO 2	9610	3	4	2	4.56
LO 2	9610	3	4	3	2.28
LO 2	9610	3	4	4	7.14
LO 2	9612	1	4	1	1.5
LO 2	9612	1	4	2	2.54
LO 2	9612	1	4	3	2.93
LO 2	9612	1	4	4	3.07
LO 2	9612	2	4	1	0
LO 2	9612	2	4	2	2.82
LO 2	9612	2	4	3	2.16
LO 2	9612	2	4	4	1.75
LO 2	9612	3	4	1	2.45
LO 2	9612	3	4	2	2.01
LO 2	9612	3	4	3	1.91
LO 2	9612	3	4	4	1.73
LO 2	9605	1	4	1	4.66
LO 2	9605	1	4	2	1.78
LO 2	9605	1	4	3	3.67
LO 2	9605	1	4	4	3.05
LO 2	9605	2	4	1	2.74
LO 2	9605	2	4	2	1.12
LO 2	9605	2	4	3	2.68
LO 2	9605	2	4	4	5.16
LO 2	9605	3	4	1	3.28
LO 2	9605	3	4	2	2.64
LO 2	9605	3	4	3	3.37
LO 2	9605	3	4	4	4.15
LO 2	748	1	4	1	2.15
LO 2	748	1	4	2	2.18
LO 2	748	1	4	3	1.89
LO 2	748	1	4	4	2.79
LO 2	748	2	4	1	2.75
LO 2	748	2	4	2	2.09
LO 2	748	2	4	3	2.4
LO 2	748	2	4	4	3.94
LO 2	748	3	4	1	3.28
LO 2	748	3	4	2	3.16
LO 2	748	3	4	3	2.59
LO 2	748	3	4	4	2.06
LO 2	9401	1	4	1	4.44
LO 2	9401	1	4	2	5.41
LO 2	9401	1	4	3	4.54
LO 2	9401	1	4	4	2.71
LO 2	9401	2	4	1	3.1
LO 2	9401	2	4	2	2.94
LO 2	9401	2	4	3	5.72
LO 2	9401	2	4	4	3
LO 2	9401	3	4	1	4.47
LO 2	9401	3	4	2	2.43
LO 2	9401	3	4	3	3.47
LO 2	9401	3	4	4	3.7
LO 2	9174	1	4	1	2.73
LO 2	9174	1	4	2	3.35
LO 2	9174	1	4	3	3
LO 2	9174	1	4	4	2.74
LO 2	9174	2	4	1	5.17
LO 2	9174	2	4	2	5.66
LO 2	9174	2	4	3	3.85
LO 2	9174	2	4	4	3.74
LO 2	9174	3	4	1	4.8
LO 2	9174	3	4	2	4.45
LO 2	9174	3	4	3	5.47
LO 2	9174	3	4	4	4.21
LO 2	9732	1	4	1	2.14
LO 2	9732	1	4	2	2.61
LO 2	9732	1	4	3	2.45
LO 2	9732	1	4	4	2.27
LO 2	9732	2	4	1	2.51
LO 2	9732	2	4	2	2.63
LO 2	9732	2	4	3	0
LO 2	9732	2	4	4	1.2
LO 2	9732	3	4	1	1.53
LO 2	9732	3	4	2	2.25
LO 2	9732	3	4	3	2.14
LO 2	9732	3	4	4	1.8
LO 2	9714	1	4	1	2.57
LO 2	9714	1	4	2	2.55
LO 2	9714	1	4	3	2.07
LO 2	9714	1	4	4	3.72
LO 2	9714	2	4	1	3.08
LO 2	9714	2	4	2	1.41
LO 2	9714	2	4	3	2.73
LO 2	9714	2	4	4	2.58
LO 2	9714	3	4	1	3.01
LO 2	9714	3	4	2	1.12
LO 2	9714	3	4	3	1.28
LO 2	9714	3	4	4	5.25
LO 2	0006	1	4	1	5.7
LO 2	0006	1	4	2	6.27
LO 2	0006	1	4	3	6.88
LO 2	0006	1	4	4	5.37
LO 2	0006	2	4	1	4.41
LO 2	0006	2	4	2	7.03
LO 2	0006	2	4	3	5.07
LO 2	0006	2	4	4	6.61
LO 2	0006	3	4	1	7.08
LO 2	0006	3	4	2	7.37
LO 2	0006	3	4	3	7.64
LO 2	0006	3	4	4	6.64
LO 2	254-2	1	4	1	2.76
LO 2	254-2	1	4	2	2.07
LO 2	254-2	1	4	3	3.13
LO 2	254-2	1	4	4	5.44
LO 2	254-2	2	4	1	5.01
LO 2	254-2	2	4	2	5.08
LO 2	254-2	2	4	3	4.06
LO 2	254-2	2	4	4	5.61
LO 2	254-2	3	4	1	5.04
LO 2	254-2	3	4	2	4.08
LO 2	254-2	3	4	3	7.16
LO 2	254-2	3	4	4	5.35
LO 2	254-8	1	4	1	6.96
LO 2	254-8	1	4	2	5.28
LO 2	254-8	1	4	3	6.02
LO 2	254-8	1	4	4	3.93
LO 2	254-8	2	4	1	4.84
LO 2	254-8	2	4	2	4.86
LO 2	254-8	2	4	3	4.26
LO 2	254-8	2	4	4	6.6
LO 2	254-8	3	4	1	7.09
LO 2	254-8	3	4	2	6.52
LO 2	254-8	3	4	3	7.02
LO 2	254-8	3	4	4	6.9
LO 2	254-11	1	4	1	6.03
LO 2	254-11	1	4	2	6.66
LO 2	254-11	1	4	3	6.3
LO 2	254-11	1	4	4	6.08
LO 2	254-11	2	4	1	5.85
LO 2	254-11	2	4	2	6.15
LO 2	254-11	2	4	3	6.51
LO 2	254-11	2	4	4	8.11
LO 2	254-11	3	4	1	6.97
LO 2	254-11	3	4	2	7.71
LO 2	254-11	3	4	3	7.3
LO 2	254-11	3	4	4	6.62
LO 1	9610	1	4	1	2.39
LO 1	9610	1	4	2	3.58
LO 1	9610	1	4	3	5.71
LO 1	9610	1	4	4	6.7
LO 1	9610	2	4	1	5.36
LO 1	9610	2	4	2	4.73
LO 1	9610	2	4	3	2.4
LO 1	9610	2	4	4	4.41
LO 1	9610	3	4	1	0
LO 1	9610	3	4	2	3.36
LO 1	9610	3	4	3	4.85
LO 1	9610	3	4	4	4.16
LO 1	9612	1	4	1	2.52
LO 1	9612	1	4	2	1.55
LO 1	9612	1	4	3	2.54
LO 1	9612	1	4	4	2.29
LO 1	9612	2	4	1	2.26
LO 1	9612	2	4	2	2.58
LO 1	9612	2	4	3	2.91
LO 1	9612	2	4	4	1.3
LO 1	9612	3	4	1	1.84
LO 1	9612	3	4	2	1.52
LO 1	9612	3	4	3	1.57
LO 1	9612	3	4	4	1.7
LO 1	9605	1	4	1	2.45
LO 1	9605	1	4	2	1.95
LO 1	9605	1	4	3	2.04
LO 1	9605	1	4	4	2.56
LO 1	9605	2	4	1	1.93
LO 1	9605	2	4	2	1.74
LO 1	9605	2	4	3	1.88
LO 1	9605	2	4	4	1.26
LO 1	9605	3	4	1	1.27
LO 1	9605	3	4	2	1.75
LO 1	9605	3	4	3	1.54
LO 1	9605	3	4	4	2.48
LO 1	748	1	4	1	3.84
LO 1	748	1	4	2	2.83
LO 1	748	1	4	3	3.14
LO 1	748	1	4	4	3.15
LO 1	748	2	4	1	2.13
LO 1	748	2	4	2	2.2
LO 1	748	2	4	3	3.07
LO 1	748	2	4	4	2.19
LO 1	748	3	4	1	2.5
LO 1	748	3	4	2	2.06
LO 1	748	3	4	3	1.82
LO 1	748	3	4	4	2.33
LO 1	9401	1	4	1	9.38
LO 1	9401	1	4	2	8.94
LO 1	9401	1	4	3	9.01
LO 1	9401	1	4	4	8.36
LO 1	9401	2	4	1	6.5
LO 1	9401	2	4	2	3.98
LO 1	9401	2	4	3	2.37
LO 1	9401	2	4	4	3.78
LO 1	9401	3	4	1	2.96
LO 1	9401	3	4	2	5.34
LO 1	9401	3	4	3	5.97
LO 1	9401	3	4	4	7.4
LO 1	9174	1	4	1	5.97
LO 1	9174	1	4	2	4.32
LO 1	9174	1	4	3	5.98
LO 1	9174	1	4	4	6.28
LO 1	9174	2	4	1	7.91
LO 1	9174	2	4	2	4.3
LO 1	9174	2	4	3	2.71
LO 1	9174	2	4	4	2.82
LO 1	9174	3	4	1	4.47
LO 1	9174	3	4	2	4.66
LO 1	9174	3	4	3	3.61
LO 1	9174	3	4	4	4.67
LO 1	9732	1	4	1	3.24
LO 1	9732	1	4	2	2.71
LO 1	9732	1	4	3	1.73
LO 1	9732	1	4	4	3.05
LO 1	9732	2	4	1	1.66
LO 1	9732	2	4	2	1.34
LO 1	9732	2	4	3	1.39
LO 1	9732	2	4	4	2.78
LO 1	9732	3	4	1	0.9
LO 1	9732	3	4	2	1.6
LO 1	9732	3	4	3	2.72
LO 1	9732	3	4	4	3.02
LO 1	9714	1	4	1	3.23
LO 1	9714	1	4	2	4.05
LO 1	9714	1	4	3	3.14
LO 1	9714	1	4	4	2.4
LO 1	9714	2	4	1	2.67
LO 1	9714	2	4	2	3.42
LO 1	9714	2	4	3	3.67
LO 1	9714	2	4	4	2.9
LO 1	9714	3	4	1	3.63
LO 1	9714	3	4	2	1.66
LO 1	9714	3	4	3	3.06
LO 1	9714	3	4	4	3.44
LO 1	0006	1	4	1	2.75
LO 1	0006	1	4	2	5.02
LO 1	0006	1	4	3	6.35
LO 1	0006	1	4	4	5.13
LO 1	0006	2	4	1	2.38
LO 1	0006	2	4	2	5.2
LO 1	0006	2	4	3	3.12
LO 1	0006	2	4	4	4.64
LO 1	0006	3	4	1	7.26
LO 1	0006	3	4	2	6.26
LO 1	0006	3	4	3	4.81
LO 1	0006	3	4	4	2.76
LO 1	254-2	1	4	1	4.71
LO 1	254-2	1	4	2	3.27
LO 1	254-2	1	4	3	2.58
LO 1	254-2	1	4	4	5.04
LO 1	254-2	2	4	1	3.92
LO 1	254-2	2	4	2	2.09
LO 1	254-2	2	4	3	4.1
LO 1	254-2	2	4	4	2.63
LO 1	254-2	3	4	1	3.1
LO 1	254-2	3	4	2	1.84
LO 1	254-2	3	4	3	3.94
LO 1	254-2	3	4	4	2.45
LO 1	254-8	1	4	1	2.95
LO 1	254-8	1	4	2	2.88
LO 1	254-8	1	4	3	7.19
LO 1	254-8	1	4	4	7.39
LO 1	254-8	2	4	1	4.62
LO 1	254-8	2	4	2	4.65
LO 1	254-8	2	4	3	4.23
LO 1	254-8	2	4	4	5.8
LO 1	254-8	3	4	1	4.61
LO 1	254-8	3	4	2	4.56
LO 1	254-8	3	4	3	5.7
LO 1	254-8	3	4	4	4.09
LO 1	254-11	1	4	1	3.85
LO 1	254-11	1	4	2	4.48
LO 1	254-11	1	4	3	3.38
LO 1	254-11	1	4	4	2.03
LO 1	254-11	2	4	1	3.95
LO 1	254-11	2	4	2	4.61
LO 1	254-11	2	4	3	4.3
LO 1	254-11	2	4	4	3.13
LO 1	254-11	3	4	1	4.56
LO 1	254-11	3	4	2	6.6
LO 1	254-11	3	4	3	6.36
LO 1	254-11	3	4	4	2.95
OT 1	9610	1	4	1	8.14
OT 1	9610	1	4	2	6.58
OT 1	9610	1	4	3	7.2
OT 1	9610	1	4	4	7
OT 1	9610	2	4	1	2.96
OT 1	9610	2	4	2	2.63
OT 1	9610	2	4	3	2.61
OT 1	9610	2	4	4	2.85
OT 1	9610	3	4	1	1.91
OT 1	9610	3	4	2	2.29
OT 1	9610	3	4	3	7.04
OT 1	9610	3	4	4	2.16
OT 1	9612	1	4	1	2.21
OT 1	9612	1	4	2	1.82
OT 1	9612	1	4	3	2.02
OT 1	9612	1	4	4	1.79
OT 1	9612	2	4	1	1.82
OT 1	9612	2	4	2	1.76
OT 1	9612	2	4	3	1.9
OT 1	9612	2	4	4	2.11
OT 1	9612	3	4	1	2.16
OT 1	9612	3	4	2	1.66
OT 1	9612	3	4	3	1.63
OT 1	9612	3	4	4	1.83
OT 1	9605	1	4	1	1.84
OT 1	9605	1	4	2	1.66
OT 1	9605	1	4	3	1.93
OT 1	9605	1	4	4	1.23
OT 1	9605	2	4	1	1.23
OT 1	9605	2	4	2	3.32
OT 1	9605	2	4	3	3.41
OT 1	9605	2	4	4	1.95
OT 1	9605	3	4	1	1.87
OT 1	9605	3	4	2	1.77
OT 1	9605	3	4	3	1.74
OT 1	9605	3	4	4	2.04
OT 1	748	1	4	1	1.06
OT 1	748	1	4	2	2.31
OT 1	748	1	4	3	1.39
OT 1	748	1	4	4	2.82
OT 1	748	2	4	1	3.35
OT 1	748	2	4	2	1.15
OT 1	748	2	4	3	2.65
OT 1	748	2	4	4	2.44
OT 1	748	3	4	1	1.24
OT 1	748	3	4	2	2.43
OT 1	748	3	4	3	2.33
OT 1	748	3	4	4	2.23
OT 1	9401	1	4	1	10.06
OT 1	9401	1	4	2	11.71
OT 1	9401	1	4	3	11.56
OT 1	9401	1	4	4	8.52
OT 1	9401	2	4	1	9.39
OT 1	9401	2	4	2	8.87
OT 1	9401	2	4	3	10.04
OT 1	9401	2	4	4	10.66
OT 1	9401	3	4	1	9.67
OT 1	9401	3	4	2	9.54
OT 1	9401	3	4	3	9.38
OT 1	9401	3	4	4	8.15
OT 1	9174	1	4	1	4.68
OT 1	9174	1	4	2	3.08
OT 1	9174	1	4	3	5.59
OT 1	9174	1	4	4	2.79
OT 1	9174	2	4	1	5.74
OT 1	9174	2	4	2	4.56
OT 1	9174	2	4	3	3.65
OT 1	9174	2	4	4	5.12
OT 1	9174	3	4	1	5.47
OT 1	9174	3	4	2	7.84
OT 1	9174	3	4	3	6.17
OT 1	9174	3	4	4	8.08
OT 1	9732	1	4	1	1.49
OT 1	9732	1	4	2	1.76
OT 1	9732	1	4	3	1.56
OT 1	9732	1	4	4	1.41
OT 1	9732	2	4	1	2.72
OT 1	9732	2	4	2	2
OT 1	9732	2	4	3	1.89
OT 1	9732	2	4	4	1.22
OT 1	9732	3	4	1	2.21
OT 1	9732	3	4	2	1.79
OT 1	9732	3	4	3	1.57
OT 1	9732	3	4	4	1.39
OT 1	9714	1	4	1	1.26
OT 1	9714	1	4	2	1.18
OT 1	9714	1	4	3	1.53
OT 1	9714	1	4	4	2.2
OT 1	9714	2	4	1	1.56
OT 1	9714	2	4	2	3.37
OT 1	9714	2	4	3	5.77
OT 1	9714	2	4	4	2.21
OT 1	9714	3	4	1	3.95
OT 1	9714	3	4	2	3.59
OT 1	9714	3	4	3	0
OT 1	9714	3	4	4	2.21
OT 1	0006	1	4	1	7.95
OT 1	0006	1	4	2	8.61
OT 1	0006	1	4	3	8
OT 1	0006	1	4	4	8.47
OT 1	0006	2	4	1	7.79
OT 1	0006	2	4	2	8.86
OT 1	0006	2	4	3	7.83
OT 1	0006	2	4	4	8.33
OT 1	0006	3	4	1	7.46
OT 1	0006	3	4	2	8.72
OT 1	0006	3	4	3	7.74
OT 1	0006	3	4	4	8.41
OT 1	254-2	1	4	1	4.27
OT 1	254-2	1	4	2	1.5
OT 1	254-2	1	4	3	3.2
OT 1	254-2	1	4	4	3.58
OT 1	254-2	2	4	1	3.54
OT 1	254-2	2	4	2	3.95
OT 1	254-2	2	4	3	3.97
OT 1	254-2	2	4	4	2.64
OT 1	254-2	3	4	1	4.28
OT 1	254-2	3	4	2	4.38
OT 1	254-2	3	4	3	3.1
OT 1	254-2	3	4	4	1.72
OT 1	254-8	1	4	1	7.78
OT 1	254-8	1	4	2	6.04
OT 1	254-8	1	4	3	8.59
OT 1	254-8	1	4	4	8.07
OT 1	254-8	2	4	1	7.58
OT 1	254-8	2	4	2	9.46
OT 1	254-8	2	4	3	8.57
OT 1	254-8	2	4	4	7.77
OT 1	254-8	3	4	1	8.24
OT 1	254-8	3	4	2	7.36
OT 1	254-8	3	4	3	8.03
OT 1	254-8	3	4	4	7.08
OT 1	254-11	1	4	1	5.48
OT 1	254-11	1	4	2	7.83
OT 1	254-11	1	4	3	4.22
OT 1	254-11	1	4	4	5.74
OT 1	254-11	2	4	1	4.93
OT 1	254-11	2	4	2	6.74
OT 1	254-11	2	4	3	5.36
OT 1	254-11	2	4	4	9.75
OT 1	254-11	3	4	1	4.54
OT 1	254-11	3	4	2	5.85
OT 1	254-11	3	4	3	3.5
OT 1	254-11	3	4	4	5.24
OT 2	9610	1	4	1	2
OT 2	9610	1	4	2	0.7
OT 2	9610	1	4	3	1.53
OT 2	9610	1	4	4	1.5
OT 2	9610	2	4	1	1.65
OT 2	9610	2	4	2	0
OT 2	9610	2	4	3	1.15
OT 2	9610	2	4	4	1.32
OT 2	9610	3	4	1	1.7
OT 2	9610	3	4	2	3.56
OT 2	9610	3	4	3	3.67
OT 2	9610	3	4	4	2.31
OT 2	9612	1	4	1	3.04
OT 2	9612	1	4	2	2.24
OT 2	9612	1	4	3	2.59
OT 2	9612	1	4	4	3.1
OT 2	9612	2	4	1	4.34
OT 2	9612	2	4	2	4
OT 2	9612	2	4	3	3.42
OT 2	9612	2	4	4	4.15
OT 2	9612	3	4	1	1.8
OT 2	9612	3	4	2	2.94
OT 2	9612	3	4	3	3.31
OT 2	9612	3	4	4	3.71
OT 2	9605	1	4	1	3.17
OT 2	9605	1	4	2	1.65
OT 2	9605	1	4	3	2.4
OT 2	9605	1	4	4	1.9
OT 2	9605	2	4	1	1.69
OT 2	9605	2	4	2	1.84
OT 2	9605	2	4	3	1.57
OT 2	9605	2	4	4	1.18
OT 2	9605	3	4	1	1.68
OT 2	9605	3	4	2	1.74
OT 2	9605	3	4	3	1.98
OT 2	9605	3	4	4	1.48
OT 2	748	1	4	1	5.36
OT 2	748	1	4	2	3.91
OT 2	748	1	4	3	3.64
OT 2	748	1	4	4	5.72
OT 2	748	2	4	1	3.08
OT 2	748	2	4	2	4.75
OT 2	748	2	4	3	6.59
OT 2	748	2	4	4	4.47
OT 2	748	3	4	1	3.11
OT 2	748	3	4	2	3.58
OT 2	748	3	4	3	3.13
OT 2	748	3	4	4	3.89
OT 2	9401	1	4	1	10.2
OT 2	9401	1	4	2	9.7
OT 2	9401	1	4	3	8.3
OT 2	9401	1	4	4	7.6
OT 2	9401	2	4	1	2.28
OT 2	9401	2	4	2	8.04
OT 2	9401	2	4	3	3.69
OT 2	9401	2	4	4	2.97
OT 2	9401	3	4	1	8.71
OT 2	9401	3	4	2	7.74
OT 2	9401	3	4	3	4.56
OT 2	9401	3	4	4	8.81
OT 2	9174	1	4	1	3.98
OT 2	9174	1	4	2	4.89
OT 2	9174	1	4	3	2.98
OT 2	9174	1	4	4	2.94
OT 2	9174	2	4	1	6
OT 2	9174	2	4	2	7.12
OT 2	9174	2	4	3	5.12
OT 2	9174	2	4	4	7.97
OT 2	9174	3	4	1	8.84
OT 2	9174	3	4	2	7.05
OT 2	9174	3	4	3	7.65
OT 2	9174	3	4	4	7.32
OT 2	9732	1	4	1	2.87
OT 2	9732	1	4	2	1.81
OT 2	9732	1	4	3	1.87
OT 2	9732	1	4	4	2
OT 2	9732	2	4	1	1.58
OT 2	9732	2	4	2	1.26
OT 2	9732	2	4	3	1.42
OT 2	9732	2	4	4	1.39
OT 2	9732	3	4	1	1.5
OT 2	9732	3	4	2	1.66
OT 2	9732	3	4	3	1.79
OT 2	9732	3	4	4	1.63
OT 2	9714	1	4	1	0.5
OT 2	9714	1	4	2	0.96
OT 2	9714	1	4	3	1.29
OT 2	9714	1	4	4	0.66
OT 2	9714	2	4	1	0.7
OT 2	9714	2	4	2	0
OT 2	9714	2	4	3	0.4
OT 2	9714	2	4	4	1
OT 2	9714	3	4	1	0.7
OT 2	9714	3	4	2	0
OT 2	9714	3	4	3	4
OT 2	9714	3	4	4	1
OT 2	0006	1	4	1	8.32
OT 2	0006	1	4	2	8.06
OT 2	0006	1	4	3	8.47
OT 2	0006	1	4	4	9.02
OT 2	0006	2	4	1	10.02
OT 2	0006	2	4	2	9.28
OT 2	0006	2	4	3	10.19
OT 2	0006	2	4	4	9.48
OT 2	0006	3	4	1	8.74
OT 2	0006	3	4	2	9.79
OT 2	0006	3	4	3	9.48
OT 2	0006	3	4	4	8.65
OT 2	254-2	1	4	1	2.81
OT 2	254-2	1	4	2	2.3
OT 2	254-2	1	4	3	5.3
OT 2	254-2	1	4	4	2.14
OT 2	254-2	2	4	1	4.25
OT 2	254-2	2	4	2	5.4
OT 2	254-2	2	4	3	4.36
OT 2	254-2	2	4	4	8.88
OT 2	254-2	3	4	1	6.95
OT 2	254-2	3	4	2	5.6
OT 2	254-2	3	4	3	5.51
OT 2	254-2	3	4	4	6.09
OT 2	254-8	1	4	1	4.68
OT 2	254-8	1	4	2	5.47
OT 2	254-8	1	4	3	3.19
OT 2	254-8	1	4	4	8.58
OT 2	254-8	2	4	1	7.64
OT 2	254-8	2	4	2	3.65
OT 2	254-8	2	4	3	7.58
OT 2	254-8	2	4	4	2.94
OT 2	254-8	3	4	1	4.67
OT 2	254-8	3	4	2	3.74
OT 2	254-8	3	4	3	5.22
OT 2	254-8	3	4	4	5.48
OT 2	254-11	1	4	1	3.74
OT 2	254-11	1	4	2	4.53
OT 2	254-11	1	4	3	2.6
OT 2	254-11	1	4	4	4.48
OT 2	254-11	2	4	1	5.14
OT 2	254-11	2	4	2	1.08
OT 2	254-11	2	4	3	4.63
OT 2	254-11	2	4	4	3.31
OT 2	254-11	3	4	1	0.9
OT 2	254-11	3	4	2	8.33
OT 2	254-11	3	4	3	6.35
OT 2	254-11	3	4	4	4.91
OT 3	9610	1	4	1	5.69
OT 3	9610	1	4	2	3.58
OT 3	9610	1	4	3	2.49
OT 3	9610	1	4	4	6.13
OT 3	9610	2	4	1	4.93
OT 3	9610	2	4	2	4.57
OT 3	9610	2	4	3	2.38
OT 3	9610	2	4	4	5.91
OT 3	9610	3	4	1	5.42
OT 3	9610	3	4	2	4.02
OT 3	9610	3	4	3	3.53
OT 3	9610	3	4	4	4.27
OT 3	9612	1	4	1	1.34
OT 3	9612	1	4	2	2.55
OT 3	9612	1	4	3	0
OT 3	9612	1	4	4	2.42
OT 3	9612	2	4	1	3.37
OT 3	9612	2	4	2	2.3
OT 3	9612	2	4	3	1.25
OT 3	9612	2	4	4	2.73
OT 3	9612	3	4	1	2.13
OT 3	9612	3	4	2	2.83
OT 3	9612	3	4	3	3.17
OT 3	9612	3	4	4	1.94
OT 3	9605	1	4	1	3.63
OT 3	9605	1	4	2	1.25
OT 3	9605	1	4	3	3.34
OT 3	9605	1	4	4	4.12
OT 3	9605	2	4	1	3.67
OT 3	9605	2	4	2	3.24
OT 3	9605	2	4	3	2.99
OT 3	9605	2	4	4	3.48
OT 3	9605	3	4	1	5.56
OT 3	9605	3	4	2	3.9
OT 3	9605	3	4	3	3.47
OT 3	9605	3	4	4	3.04
OT 3	748	1	4	1	2.6
OT 3	748	1	4	2	1.46
OT 3	748	1	4	3	1.65
OT 3	748	1	4	4	2.04
OT 3	748	2	4	1	2.58
OT 3	748	2	4	2	1.88
OT 3	748	2	4	3	2.34
OT 3	748	2	4	4	2.86
OT 3	748	3	4	1	1.68
OT 3	748	3	4	2	1.99
OT 3	748	3	4	3	2.03
OT 3	748	3	4	4	1.72
OT 3	9401	1	4	1	5.84
OT 3	9401	1	4	2	5.07
OT 3	9401	1	4	3	4.75
OT 3	9401	1	4	4	5.21
OT 3	9401	2	4	1	7.58
OT 3	9401	2	4	2	5.66
OT 3	9401	2	4	3	5.93
OT 3	9401	2	4	4	7.38
OT 3	9401	3	4	1	7.06
OT 3	9401	3	4	2	5.71
OT 3	9401	3	4	3	4.82
OT 3	9401	3	4	4	6.15
OT 3	9174	1	4	1	4.36
OT 3	9174	1	4	2	5.87
OT 3	9174	1	4	3	5.5
OT 3	9174	1	4	4	6.02
OT 3	9174	2	4	1	2.15
OT 3	9174	2	4	2	2.05
OT 3	9174	2	4	3	2.24
OT 3	9174	2	4	4	5.86
OT 3	9174	3	4	1	3.84
OT 3	9174	3	4	2	5.58
OT 3	9174	3	4	3	5.13
OT 3	9174	3	4	4	6.9
OT 3	9732	1	4	1	2.47
OT 3	9732	1	4	2	2.06
OT 3	9732	1	4	3	1.4
OT 3	9732	1	4	4	2.38
OT 3	9732	2	4	1	2.9
OT 3	9732	2	4	2	2.5
OT 3	9732	2	4	3	2.5
OT 3	9732	2	4	4	2.6
OT 3	9732	3	4	1	3.22
OT 3	9732	3	4	2	3.09
OT 3	9732	3	4	3	2.67
OT 3	9732	3	4	4	3.02
OT 3	9714	1	4	1	4.6
OT 3	9714	1	4	2	1.65
OT 3	9714	1	4	3	1.43
OT 3	9714	1	4	4	3.89
OT 3	9714	2	4	1	2.79
OT 3	9714	2	4	2	1.2
OT 3	9714	2	4	3	3.88
OT 3	9714	2	4	4	1.15
OT 3	9714	3	4	1	2.2
OT 3	9714	3	4	2	2.96
OT 3	9714	3	4	3	3.03
OT 3	9714	3	4	4	3.54
OT 3	0006	1	4	1	8.36
OT 3	0006	1	4	2	8.34
OT 3	0006	1	4	3	8.04
OT 3	0006	1	4	4	8.58
OT 3	0006	2	4	1	8.91
OT 3	0006	2	4	2	7
OT 3	0006	2	4	3	8.53
OT 3	0006	2	4	4	8.87
OT 3	0006	3	4	1	8.22
OT 3	0006	3	4	2	7.64
OT 3	0006	3	4	3	7.84
OT 3	0006	3	4	4	8.22
OT 3	254-2	1	4	1	3.61
OT 3	254-2	1	4	2	1.59
OT 3	254-2	1	4	3	4.54
OT 3	254-2	1	4	4	4.05
OT 3	254-2	2	4	1	4.85
OT 3	254-2	2	4	2	3.55
OT 3	254-2	2	4	3	5
OT 3	254-2	2	4	4	1.15
OT 3	254-2	3	4	1	1.49
OT 3	254-2	3	4	2	3.06
OT 3	254-2	3	4	3	2.54
OT 3	254-2	3	4	4	5
OT 3	254-8	1	4	1	6.05
OT 3	254-8	1	4	2	4.81
OT 3	254-8	1	4	3	5.81
OT 3	254-8	1	4	4	5.64
OT 3	254-8	2	4	1	5.4
OT 3	254-8	2	4	2	6.43
OT 3	254-8	2	4	3	5.38
[truncated: 593 more rows]

## Sheet: MJ19
section	be	leaf	dpi	spot	ls
A 1	9610	1	4	1	11.36
A 1	9610	1	4	2	10.16
A 1	9610	1	4	3	11.43
A 1	9610	1	4	4	13.87
A 1	9610	2	4	1	5
A 1	9610	2	4	2	5.39
A 1	9610	2	4	3	4
A 1	9610	2	4	4	4.31
A 1	9610	3	4	1	11.23
A 1	9610	3	4	2	8.95
A 1	9610	3	4	3	11.61
A 1	9610	3	4	4	8.72
A 1	9612	1	4	1	5.07
A 1	9612	1	4	2	7.87
A 1	9612	1	4	3	8.34
A 1	9612	1	4	4	7.17
A 1	9612	2	4	1	10.93
A 1	9612	2	4	2	11.71
A 1	9612	2	4	3	11.22
A 1	9612	2	4	4	10.75
A 1	9612	3	4	1	7.89
A 1	9612	3	4	2	11.31
A 1	9612	3	4	3	10.86
A 1	9612	3	4	4	9.96
A 1	9605	1	4	1	13.88
A 1	9605	1	4	2	5.92
A 1	9605	1	4	3	9.8
A 1	9605	1	4	4	7.5
A 1	9605	2	4	1	13.2
A 1	9605	2	4	2	11.47
A 1	9605	2	4	3	11.51
A 1	9605	2	4	4	10.21
A 1	9605	3	4	1	8.9
A 1	9605	3	4	2	14.9
A 1	9605	3	4	3	3.43
A 1	9605	3	4	4	13.3
A 1	748	1	4	1	12.15
A 1	748	1	4	2	12
A 1	748	1	4	3	13
A 1	748	1	4	4	12.4
A 1	748	2	4	1	1.6
A 1	748	2	4	2	2.8
A 1	748	2	4	3	3.1
A 1	748	2	4	4	7.72
A 1	748	3	4	1	8.63
A 1	748	3	4	2	9.15
A 1	748	3	4	3	8.77
A 1	748	3	4	4	10.25
A 1	9401	1	4	1	18
A 1	9401	1	4	2	22.12
A 1	9401	1	4	3	9
A 1	9401	1	4	4	18
A 1	9401	2	4	1	14
A 1	9401	2	4	2	13.3
A 1	9401	2	4	3	16
A 1	9401	2	4	4	22.75
A 1	9401	3	4	1	15
A 1	9401	3	4	2	18.2
A 1	9401	3	4	3	15.8
A 1	9401	3	4	4	18.9
A 1	9174	1	4	1	16.03
A 1	9174	1	4	2	15.58
A 1	9174	1	4	3	15.34
A 1	9174	1	4	4	18.77
A 1	9174	2	4	1	16.49
A 1	9174	2	4	2	13.45
A 1	9174	2	4	3	14.87
A 1	9174	2	4	4	17.63
A 1	9174	3	4	1	17.23
A 1	9174	3	4	2	18.57
A 1	9174	3	4	3	14.49
A 1	9174	3	4	4	15.12
A 1	9732	1	4	1	9.42
A 1	9732	1	4	2	7.4
A 1	9732	1	4	3	1.47
A 1	9732	1	4	4	3.95
A 1	9732	2	4	1	5.03
A 1	9732	2	4	2	3.1
A 1	9732	2	4	3	4.67
A 1	9732	2	4	4	4.12
A 1	9732	3	4	1	2.21
A 1	9732	3	4	2	4.04
A 1	9732	3	4	3	4.76
A 1	9732	3	4	4	2.77
A 1	9714	1	4	1	0
A 1	9714	1	4	2	16
A 1	9714	1	4	3	3.9
A 1	9714	1	4	4	14
A 1	9714	2	4	1	11.6
A 1	9714	2	4	2	0
A 1	9714	2	4	3	14
A 1	9714	2	4	4	12.6
A 1	9714	3	4	1	5.5
A 1	9714	3	4	2	13.21
A 1	9714	3	4	3	10.9
A 1	9714	3	4	4	5.43
A 1	0006	1	4	1	20
A 1	0006	1	4	2	19.8
A 1	0006	1	4	3	17.9
A 1	0006	1	4	4	21.4
A 1	0006	2	4	1	17.08
A 1	0006	2	4	2	20.3
A 1	0006	2	4	3	18.15
A 1	0006	2	4	4	20.68
A 1	0006	3	4	1	18.82
A 1	0006	3	4	2	19.65
A 1	0006	3	4	3	17.25
A1	0006	3	4	4	16.09
A 1	254-2	1	4	1	16.94
A 1	254-2	1	4	2	15.92
A 1	254-2	1	4	3	15.73
A 1	254-2	1	4	4	15.44
A 1	254-2	2	4	1	16
A 1	254-2	2	4	2	15.07
A 1	254-2	2	4	3	14.06
A 1	254-2	2	4	4	13.35
A 1	254-2	3	4	1	15.97
A 1	254-2	3	4	2	19.65
A 1	254-2	3	4	3	18.26
A 1	254-2	3	4	4	17.16
A 1	254-8	1	4	1	17.8
A 1	254-8	1	4	2	13.6
A 1	254-8	1	4	3	13.3
A 1	254-8	1	4	4	14.55
A 1	254-8	2	4	1	15.23
A 1	254-8	2	4	2	13.68
A 1	254-8	2	4	3	12.44
A 1	254-8	2	4	4	15.38
A 1	254-8	3	4	1	18.8
A 1	254-8	3	4	2	16.3
A 1	254-8	3	4	3	13.2
A 1	254-8	3	4	4	17.84
A 1	254-11	1	4	1	21.2
A 1	254-11	1	4	2	20.45
A 1	254-11	1	4	3	20.19
A 1	254-11	1	4	4	21.65
A 1	254-11	2	4	1	17.63
A 1	254-11	2	4	2	16.21
A 1	254-11	2	4	3	14.03
A 1	254-11	2	4	4	14.54
A 1	254-11	3	4	1	14.36
A 1	254-11	3	4	2	12.35
A 1	254-11	3	4	3	15.79
A 1	254-11	3	4	4	14.61
A 2	9610	1	4	1	9.43
A 2	9610	1	4	2	8.74
A 2	9610	1	4	3	9.26
A 2	9610	1	4	4	13.63
A 2	9610	2	4	1	9.7
A 2	9610	2	4	2	5.9
A 2	9610	2	4	3	5.6
A 2	9610	2	4	4	11.53
A 2	9610	3	4	1	10.45
A 2	9610	3	4	2	10.18
A 2	9610	3	4	3	10.51
A 2	9610	3	4	4	10.82
A 2	9612	1	4	1	6.1
A 2	9612	1	4	2	5.64
A 2	9612	1	4	3	4.91
A 2	9612	1	4	4	3.96
A 2	9612	2	4	1	4.63
A 2	9612	2	4	2	4.25
A 2	9612	2	4	3	4.38
A 2	9612	2	4	4	3.89
A 2	9612	3	4	1	4.83
A 2	9612	3	4	2	6.03
A 2	9612	3	4	3	5.71
A 2	9612	3	4	4	6.02
A 2	9605	1	4	1	8.69
A 2	9605	1	4	2	5.24
A 2	9605	1	4	3	4.57
A 2	9605	1	4	4	8.25
A 2	9605	2	4	1	8.69
A 2	9605	2	4	2	8.12
A 2	9605	2	4	3	5.65
A 2	9605	2	4	4	6.28
A 2	9605	3	4	1	11.42
A 2	9605	3	4	2	9.94
A 2	9605	3	4	3	7.38
A 2	9605	3	4	4	9.75
A 2	748	1	4	1	2.73
A 2	748	1	4	2	5.66
A 2	748	1	4	3	4.44
A 2	748	1	4	4	4.98
A 2	748	2	4	1	4.47
A 2	748	2	4	2	3.35
A 2	748	2	4	3	4.59
A 2	748	2	4	4	4.02
A 2	748	3	4	1	6.17
A 2	748	3	4	2	6.29
A 2	748	3	4	3	6.49
A 2	748	3	4	4	4.35
A 2	9401	1	4	1	18.6
A 2	9401	1	4	2	20.4
A 2	9401	1	4	3	19.9
A 2	9401	1	4	4	20.9
A 2	9401	2	4	1	21.9
A 2	9401	2	4	2	17
A 2	9401	2	4	3	19.5
A 2	9401	2	4	4	21.9
A 2	9401	3	4	1	21.3
A 2	9401	3	4	2	22.8
A 2	9401	3	4	3	24
A 2	9401	3	4	4	21.3
A 2	9174	1	4	1	19.5
A 2	9174	1	4	2	17.31
A 2	9174	1	4	3	16.35
A 2	9174	1	4	4	19.74
A 2	9174	2	4	1	17.5
A 2	9174	2	4	2	16.72
A 2	9174	2	4	3	17.24
A 2	9174	2	4	4	16.87
A 2	9174	3	4	1	16.34
A 2	9174	3	4	2	16.95
A 2	9174	3	4	3	15.39
A 2	9174	3	4	4	16.78
A 2	9732	1	4	1	4.22
A 2	9732	1	4	2	3.48
A 2	9732	1	4	3	4.27
A 2	9732	1	4	4	3.51
A 2	9732	2	4	1	3.09
A 2	9732	2	4	2	2.51
A 2	9732	2	4	3	3.5
A 2	9732	2	4	4	3.61
A 2	9732	3	4	1	3.01
A 2	9732	3	4	2	2.81
A 2	9732	3	4	3	2.14
A 2	9732	3	4	4	2.19
A 2	9714	1	4	1	4.71
A 2	9714	1	4	2	3.44
A 2	9714	1	4	3	4.72
A 2	9714	1	4	4	6.61
A 2	9714	2	4	1	4.83
A 2	9714	2	4	2	5.17
A 2	9714	2	4	3	4.87
A 2	9714	2	4	4	5.8
A 2	9714	3	4	1	2.07
A 2	9714	3	4	2	3.79
A 2	9714	3	4	3	4.1
A 2	9714	3	4	4	2.56
A 2	0006	1	4	1	23.5
A 2	0006	1	4	2	21.7
A 2	0006	1	4	3	20.85
A 2	0006	1	4	4	24.65
A 2	0006	2	4	1	21.65
A 2	0006	2	4	2	22.44
A 2	0006	2	4	3	23.12
A 2	0006	2	4	4	22.16
A 2	0006	3	4	1	23.1
A 2	0006	3	4	2	21.24
A 2	0006	3	4	3	22.23
A 2	0006	3	4	4	22.74
A 2	254-2	1	4	1	18
A 2	254-2	1	4	2	16.74
A 2	254-2	1	4	3	17.01
A 2	254-2	1	4	4	18.14
A 2	254-2	2	4	1	19.07
A 2	254-2	2	4	2	17.65
A 2	254-2	2	4	3	18.4
A 2	254-2	2	4	4	18.64
A 2	254-2	3	4	1	16.54
A 2	254-2	3	4	2	17.54
A 2	254-2	3	4	3	17.08
A 2	254-2	3	4	4	17.84
A 2	254-8	1	4	1	14.62
A 2	254-8	1	4	2	14.1
A 2	254-8	1	4	3	14.25
A 2	254-8	1	4	4	14.61
A 2	254-8	2	4	1	21
A 2	254-8	2	4	2	20.5
A 2	254-8	2	4	3	20.63
A 2	254-8	2	4	4	21.41
A 2	254-8	3	4	1	12.45
A 2	254-8	3	4	2	18
A 2	254-8	3	4	3	12.03
A 2	254-8	3	4	4	15.32
A 2	254-11	1	4	1	13.6
A 2	254-11	1	4	2	8.6
A 2	254-11	1	4	3	11.52
A 2	254-11	1	4	4	13.51
A 2	254-11	2	4	1	14
A 2	254-11	2	4	2	15.21
A 2	254-11	2	4	3	13.53
A 2	254-11	2	4	4	14.1
A 2	254-11	3	4	1	20.03
A 2	254-11	3	4	2	9.8
A 2	254-11	3	4	3	18.75
A 2	254-11	3	4	4	21.4
A 3	9610	1	4	1	11
A 3	9610	1	4	2	12.47
A 3	9610	1	4	3	11.14
A 3	9610	1	4	4	11.58
A 3	9610	2	4	1	5.69
A 3	9610	2	4	2	2.09
A 3	9610	2	4	3	8.03
A 3	9610	2	4	4	8.63
A 3	9610	3	4	1	7.63
A 3	9610	3	4	2	6.5
A 3	9610	3	4	3	4.18
A 3	9610	3	4	4	3.41
A 3	9612	1	4	1	6.68
A 3	9612	1	4	2	6.1
A 3	9612	1	4	3	5.31
A 3	9612	1	4	4	3.51
A 3	9612	2	4	1	5.24
A 3	9612	2	4	2	3.13
A 3	9612	2	4	3	6.11
A 3	9612	2	4	4	4.46
A 3	9612	3	4	1	6.26
A 3	9612	3	4	2	5.83
A 3	9612	3	4	3	5.09
A 3	9612	3	4	4	5.74
A 3	9605	1	4	1	1.52
A 3	9605	1	4	2	10.54
A 3	9605	1	4	3	9.57
A 3	9605	1	4	4	2.7
A 3	9605	2	4	1	10.2
A 3	9605	2	4	2	6.89
A 3	9605	2	4	3	9.1
A 3	9605	2	4	4	9.8
A 3	9605	3	4	1	12.8
A 3	9605	3	4	2	12.9
A 3	9605	3	4	3	3.09
A 3	9605	3	4	4	12.07
A 3	748	1	4	1	10.61
A 3	748	1	4	2	9.91
A 3	748	1	4	3	10.73
A 3	748	1	4	4	8.9
A 3	748	2	4	1	5.22
A 3	748	2	4	2	4.9
A 3	748	2	4	3	6.61
A 3	748	2	4	4	2
A 3	748	3	4	1	4.1
A 3	748	3	4	2	7.16
A 3	748	3	4	3	1.68
A 3	748	3	4	4	2.6
A 3	9401	1	4	1	15.93
A 3	9401	1	4	2	19.91
A 3	9401	1	4	3	13.36
A 3	9401	1	4	4	18.48
A 3	9401	2	4	1	26.64
A 3	9401	2	4	2	25.58
A 3	9401	2	4	3	21.56
A 3	9401	2	4	4	18.42
A 3	9401	3	4	1	28.44
A 3	9401	3	4	2	26.53
A 3	9401	3	4	3	25.6
A 3	9401	3	4	4	24.83
A 3	9174	1	4	1	9.03
A 3	9174	1	4	2	8.91
A 3	9174	1	4	3	11.74
A 3	9174	1	4	4	10.02
A 3	9174	2	4	1	9.8
A 3	9174	2	4	2	9.28
A 3	9174	2	4	3	11.06
A 3	9174	2	4	4	12.1
A 3	9174	3	4	1	12.16
A 3	9174	3	4	2	11.16
A 3	9174	3	4	3	13.6
A 3	9174	3	4	4	13.08
A 3	9732	1	4	1	2.4
A 3	9732	1	4	2	3.2
A 3	9732	1	4	3	3.4
A 3	9732	1	4	4	3.42
A 3	9732	2	4	1	4.35
A 3	9732	2	4	2	2.77
A 3	9732	2	4	3	4.5
A 3	9732	2	4	4	2.5
A 3	9732	3	4	1	3.11
A 3	9732	3	4	2	2.2
A 3	9732	3	4	3	4.11
A 3	9732	3	4	4	3.18
A 3	9714	1	4	1	2.59
A 3	9714	1	4	2	1.21
A 3	9714	1	4	3	2.21
A 3	9714	1	4	4	3.39
A 3	9714	2	4	1	4.72
A 3	9714	2	4	2	4.4
A 3	9714	2	4	3	2.19
A 3	9714	2	4	4	2.94
A 3	9714	3	4	1	2.94
A 3	9714	3	4	2	8.18
A 3	9714	3	4	3	2.97
A 3	9714	3	4	4	6.87
A 3	0006	1	4	1	13.4
A 3	0006	1	4	2	15.9
A 3	0006	1	4	3	21.1
A 3	0006	1	4	4	15.34
A 3	0006	2	4	1	18.2
A 3	0006	2	4	2	15.5
A 3	0006	2	4	3	15.9
A 3	0006	2	4	4	14.43
A 3	0006	3	4	1	9.3
A 3	0006	3	4	2	12.6
A 3	0006	3	4	3	9.44
A 3	0006	3	4	4	18.7
A 3	254-2	1	4	1	8
A 3	254-2	1	4	2	9.5
A 3	254-2	1	4	3	10.5
A 3	254-2	1	4	4	11
A 3	254-2	2	4	1	8.4
A 3	254-2	2	4	2	7.4
A 3	254-2	2	4	3	9.7
A 3	254-2	2	4	4	9.3
A 3	254-2	3	4	1	8
A 3	254-2	3	4	2	7.5
A 3	254-2	3	4	3	9.7
A 3	254-2	3	4	4	9.15
A 3	254-8	1	4	1	15.6
A 3	254-8	1	4	2	18.21
A 3	254-8	1	4	3	18.8
A 3	254-8	1	4	4	18.06
A 3	254-8	2	4	1	14.8
A 3	254-8	2	4	2	13.8
A 3	254-8	2	4	3	12
A 3	254-8	2	4	4	18.31
A 3	254-8	3	4	1	16.7
A 3	254-8	3	4	2	19.06
A 3	254-8	3	4	3	16.9
A 3	254-8	3	4	4	15.34
A 3	254-11	1	4	1	13
A 3	254-11	1	4	2	14.8
A 3	254-11	1	4	3	10.4
A 3	254-11	1	4	4	20.65
A 3	254-11	2	4	1	13.6
A 3	254-11	2	4	2	14.8
A 3	254-11	2	4	3	14.6
A 3	254-11	2	4	4	13.7
A 3	254-11	3	4	1	14.3
A 3	254-11	3	4	2	12.15
A 3	254-11	3	4	3	14.12
A 3	254-11	3	4	4	12.56
LA 3	9610	1	4	1	9.34
LA 3	9610	1	4	2	6.3
LA 3	9610	1	4	3	5.43
LA 3	9610	1	4	4	7.52
LA 3	9610	2	4	1	6.27
LA 3	9610	2	4	2	6.75
LA 3	9610	2	4	3	7.23
LA 3	9610	2	4	4	7.1
LA 3	9610	3	4	1	9.18
LA 3	9610	3	4	2	5.95
LA 3	9610	3	4	3	7.16
LA 3	9610	3	4	4	8.12
LA 3	9612	1	4	1	3.5
LA 3	9612	1	4	2	3.64
LA 3	9612	1	4	3	4.1
LA 3	9612	1	4	4	3.8
LA 3	9612	2	4	1	4.39
LA 3	9612	2	4	2	4.03
LA 3	9612	2	4	3	4.37
LA 3	9612	2	4	4	3.77
LA 3	9612	3	4	1	4.34
LA 3	9612	3	4	2	3.95
LA 3	9612	3	4	3	4.15
LA 3	9612	3	4	4	4.07
LA 3	9605	1	4	1	4.88
LA 3	9605	1	4	2	4.8
LA 3	9605	1	4	3	5.25
LA 3	9605	1	4	4	6.14
LA 3	9605	2	4	1	5.8
LA 3	9605	2	4	2	6.29
LA 3	9605	2	4	3	6.96
LA 3	9605	2	4	4	6.46
LA 3	9605	3	4	1	3.61
LA 3	9605	3	4	2	3.5
LA 3	9605	3	4	3	3.63
LA 3	9605	3	4	4	3.28
LA 3	748	1	4	1	5.24
LA 3	748	1	4	2	5.56
LA 3	748	1	4	3	5.38
LA 3	748	1	4	4	5.8
LA 3	748	2	4	1	5.37
LA 3	748	2	4	2	4.9
LA 3	748	2	4	3	5.35
LA 3	748	2	4	4	5.09
LA 3	748	3	4	1	4.8
LA 3	748	3	4	2	4.45
LA 3	748	3	4	3	4.72
LA 3	748	3	4	4	4.61
LA 3	9401	1	4	1	13.55
LA 3	9401	1	4	2	12.76
LA 3	9401	1	4	3	13.31
LA 3	9401	1	4	4	15.37
LA 3	9401	2	4	1	13.48
LA 3	9401	2	4	2	15.57
LA 3	9401	2	4	3	15.18
LA 3	9401	2	4	4	12.85
LA 3	9401	3	4	1	10.03
LA 3	9401	3	4	2	11.07
LA 3	9401	3	4	3	12.65
LA 3	9401	3	4	4	11.79
LA 3	9174	1	4	1	8.61
LA 3	9174	1	4	2	8.33
LA 3	9174	1	4	3	8.53
LA 3	9174	1	4	4	6.88
LA 3	9174	2	4	1	8.24
LA 3	9174	2	4	2	9.31
LA 3	9174	2	4	3	8.27
LA 3	9174	2	4	4	7.9
LA 3	9174	3	4	1	8.36
LA 3	9174	3	4	2	7.55
LA 3	9174	3	4	3	8.34
LA 3	9174	3	4	4	7.72
LA 3	9732	1	4	1	2.44
LA 3	9732	1	4	2	3.18
LA 3	9732	1	4	3	3.6
LA 3	9732	1	4	4	3.87
LA 3	9732	2	4	1	3.38
LA 3	9732	2	4	2	3.61
LA 3	9732	2	4	3	3.84
LA 3	9732	2	4	4	4.46
LA 3	9732	3	4	1	3.73
LA 3	9732	3	4	2	3.74
LA 3	9732	3	4	3	3.83
LA 3	9732	3	4	4	3.7
LA 3	9714	1	4	1	3.62
LA 3	9714	1	4	2	3.2
LA 3	9714	1	4	3	3.66
LA 3	9714	1	4	4	4.73
LA 3	9714	2	4	1	6.97
LA 3	9714	2	4	2	3.91
LA 3	9714	2	4	3	4
LA 3	9714	2	4	4	5.48
LA 3	9714	3	4	1	0
LA 3	9714	3	4	2	5.24
LA 3	9714	3	4	3	4.22
LA 3	9714	3	4	4	4.32
LA 3	0006	1	4	1	13.17
LA 3	0006	1	4	2	13.76
LA 3	0006	1	4	3	12.69
LA 3	0006	1	4	4	13.04
LA 3	0006	2	4	1	13.2
LA 3	0006	2	4	2	12.22
LA 3	0006	2	4	3	12.05
LA 3	0006	2	4	4	14.46
LA 3	0006	3	4	1	13.89
LA 3	0006	3	4	2	12.56
LA 3	0006	3	4	3	12.71
LA 3	0006	3	4	4	12.84
LA 3	254-2	1	4	1	7.74
LA 3	254-2	1	4	2	8.6
LA 3	254-2	1	4	3	9.7
LA 3	254-2	1	4	4	7.96
LA 3	254-2	2	4	1	6.42
LA 3	254-2	2	4	2	4.9
LA 3	254-2	2	4	3	5.8
LA 3	254-2	2	4	4	6.49
LA 3	254-2	3	4	1	5.35
LA 3	254-2	3	4	2	6.6
LA 3	254-2	3	4	3	5.6
LA 3	254-2	3	4	4	10.71
LA 3	254-8	1	4	1	14.15
LA 3	254-8	1	4	2	13.32
LA 3	254-8	1	4	3	12.5
LA 3	254-8	1	4	4	14.83
LA 3	254-8	2	4	1	8.46
LA 3	254-8	2	4	2	7.6
LA 3	254-8	2	4	3	13
LA 3	254-8	2	4	4	9.38
LA 3	254-8	3	4	1	14.15
LA 3	254-8	3	4	2	13.32
LA 3	254-8	3	4	3	12.5
LA 3	254-8	3	4	4	14.83
LA 3	254-11	1	4	1	10.26
LA 3	254-11	1	4	2	9.44
LA 3	254-11	1	4	3	11
LA 3	254-11	1	4	4	11.99
LA 3	254-11	2	4	1	10.42
LA 3	254-11	2	4	2	11.4
LA 3	254-11	2	4	3	10.62
LA 3	254-11	2	4	4	10.17
LA 3	254-11	3	4	1	10.68
LA 3	254-11	3	4	2	11.03
LA 3	254-11	3	4	3	11.5
LA 3	254-11	3	4	4	10.48
LA 1	9610	1	4	1	13.87
LA 1	9610	1	4	2	9.94
LA 1	9610	1	4	3	10.63
LA 1	9610	1	4	4	9.38
LA 1	9610	2	4	1	10.23
LA 1	9610	2	4	2	7.26
LA 1	9610	2	4	3	8.3
LA 1	9610	2	4	4	9.51
LA 1	9610	3	4	1	7.85
LA 1	9610	3	4	2	7.48
LA 1	9610	3	4	3	5.23
LA 1	9610	3	4	4	10.3
LA 1	9612	1	4	1	6.5
LA 1	9612	1	4	2	0
LA 1	9612	1	4	3	5.73
LA 1	9612	1	4	4	2.95
LA 1	9612	2	4	1	1.6
LA 1	9612	2	4	2	1.4
LA 1	9612	2	4	3	2.45
LA 1	9612	2	4	4	3.73
LA 1	9612	3	4	1	0
LA 1	9612	3	4	2	2.21
LA 1	9612	3	4	3	1.6
LA 1	9612	3	4	4	3.11
LA 1	9605	1	4	1	10.19
LA 1	9605	1	4	2	11.2
LA 1	9605	1	4	3	10.52
LA 1	9605	1	4	4	9.5
LA 1	9605	2	4	1	10.19
LA 1	9605	2	4	2	12.96
LA 1	9605	2	4	3	13.37
LA 1	9605	2	4	4	14.22
LA 1	9605	3	4	1	13.83
LA 1	9605	3	4	2	13.09
LA 1	9605	3	4	3	7.4
LA 1	9605	3	4	4	6.64
LA 1	748	1	4	1	3
LA 1	748	1	4	2	3.15
LA 1	748	1	4	3	1
LA 1	748	1	4	4	4
LA 1	748	2	4	1	1.6
LA 1	748	2	4	2	3.6
LA 1	748	2	4	3	5.7
LA 1	748	2	4	4	3.45
LA 1	748	3	4	1	1.34
LA 1	748	3	4	2	2.64
LA 1	748	3	4	3	3.5
LA 1	748	3	4	4	2.25
LA 1	9401	1	4	1	24.3
LA 1	9401	1	4	2	20.38
LA 1	9401	1	4	3	17.39
LA 1	9401	1	4	4	23.6
LA 1	9401	2	4	1	23.05
LA 1	9401	2	4	2	23.81
LA 1	9401	2	4	3	20.2
LA 1	9401	2	4	4	23.9
LA 1	9401	3	4	1	22.15
LA 1	9401	3	4	2	20.76
LA 1	9401	3	4	3	19
LA 1	9401	3	4	4	22.71
LA 1	9174	1	4	1	10.85
LA 1	9174	1	4	2	11.5
LA 1	9174	1	4	3	11.8
LA 1	9174	1	4	4	10
LA 1	9174	2	4	1	10.4
LA 1	9174	2	4	2	9.4
LA 1	9174	2	4	3	10.9
LA 1	9174	2	4	4	13.2
LA 1	9174	3	4	1	10.4
LA 1	9174	3	4	2	12.6
LA 1	9174	3	4	3	11.6
LA 1	9174	3	4	4	12.5
LA 1	9732	1	4	1	5.36
LA 1	9732	1	4	2	5.46
LA 1	9732	1	4	3	4.83
LA 1	9732	1	4	4	5.37
LA 1	9732	2	4	1	5.86
LA 1	9732	2	4	2	4.95
LA 1	9732	2	4	3	5.2
LA 1	9732	2	4	4	4.74
LA 1	9732	3	4	1	5.89
LA 1	9732	3	4	2	4.95
LA 1	9732	3	4	3	5.86
LA 1	9732	3	4	4	6.05
LA 1	9714	1	4	1	3.42
LA 1	9714	1	4	2	4.5
LA 1	9714	1	4	3	8.33
LA 1	9714	1	4	4	8.36
LA 1	9714	2	4	1	3.17
LA 1	9714	2	4	2	4.8
LA 1	9714	2	4	3	7.48
LA 1	9714	2	4	4	8.05
LA 1	9714	3	4	1	7.26
LA 1	9714	3	4	2	7.16
LA 1	9714	3	4	3	6.05
LA 1	9714	3	4	4	9.02
LA 1	0006	1	4	1	13.11
LA 1	0006	1	4	2	14.15
LA 1	0006	1	4	3	13.9
LA 1	0006	1	4	4	13.17
LA 1	0006	2	4	1	13.3
LA 1	0006	2	4	2	14.1
LA 1	0006	2	4	3	14.7
LA 1	0006	2	4	4	13.63
LA 1	0006	3	4	1	15.17
LA 1	0006	3	4	2	14.65
LA 1	0006	3	4	3	15.3
LA 1	0006	3	4	4	15.69
LA 1	254-2	1	4	1	11.25
LA 1	254-2	1	4	2	13.02
LA 1	254-2	1	4	3	10.49
LA 1	254-2	1	4	4	8.63
LA 1	254-2	2	4	1	10.4
LA 1	254-2	2	4	2	9.14
LA 1	254-2	2	4	3	9.39
LA 1	254-2	2	4	4	9.77
LA 1	254-2	3	4	1	12.14
LA 1	254-2	3	4	2	10.28
LA 1	254-2	3	4	3	10.67
LA 1	254-2	3	4	4	9.08
LA 1	254-8	1	4	1	19.9
LA 1	254-8	1	4	2	16.24
LA 1	254-8	1	4	3	21.3
LA 1	254-8	1	4	4	21.03
LA 1	254-8	2	4	1	16.27
LA 1	254-8	2	4	2	14.44
LA 1	254-8	2	4	3	15.5
LA 1	254-8	2	4	4	18.65
LA 1	254-8	3	4	1	21.27
LA 1	254-8	3	4	2	19.61
LA 1	254-8	3	4	3	17.63
LA 1	254-8	3	4	4	18.57
LA 1	254-11	1	4	1	13.3
LA 1	254-11	1	4	2	14.1
LA 1	254-11	1	4	3	17.5
LA 1	254-11	1	4	4	14.17
LA 1	254-11	2	4	1	15
LA 1	254-11	2	4	2	14.6
LA 1	254-11	2	4	3	12.34
LA 1	254-11	2	4	4	13.5
LA 1	254-11	3	4	1	13
LA 1	254-11	3	4	2	12.9
LA 1	254-11	3	4	3	13.74
LA 1	254-11	3	4	4	16.44
LA 2	9610	1	4	1	8.74
LA 2	9610	1	4	2	7.35
LA 2	9610	1	4	3	6.59
LA 2	9610	1	4	4	7.5
LA 2	9610	2	4	1	6.47
LA 2	9610	2	4	2	7.13
LA 2	9610	2	4	3	5.9
LA 2	9610	2	4	4	7.28
LA 2	9610	3	4	1	1.44
LA 2	9610	3	4	2	4.91
LA 2	9610	3	4	3	3.53
LA 2	9610	3	4	4	3.94
LA 2	9612	1	4	1	7
LA 2	9612	1	4	2	6.2
LA 2	9612	1	4	3	5.84
LA 2	9612	1	4	4	5.47
LA 2	9612	2	4	1	1.61
LA 2	9612	2	4	2	2.49
LA 2	9612	2	4	3	3.7
LA 2	9612	2	4	4	3.43
LA 2	9612	3	4	1	4.3
LA 2	9612	3	4	2	4.87
LA 2	9612	3	4	3	4.58
LA 2	9612	3	4	4	4.29
LA 2	9605	1	4	1	3.48
LA 2	9605	1	4	2	5.02
LA 2	9605	1	4	3	2.44
LA 2	9605	1	4	4	5.72
LA 2	9605	2	4	1	3.3
LA 2	9605	2	4	2	2.97
LA 2	9605	2	4	3	2.12
LA 2	9605	2	4	4	3.82
LA 2	9605	3	4	1	7.5
LA 2	9605	3	4	2	3.31
LA 2	9605	3	4	3	10.16
LA 2	9605	3	4	4	6.78
LA 2	748	1	4	1	7.7
LA 2	748	1	4	2	5.4
LA 2	748	1	4	3	8.32
LA 2	748	1	4	4	7.83
LA 2	748	2	4	1	2.82
LA 2	748	2	4	2	3.33
LA 2	748	2	4	3	4.57
LA 2	748	2	4	4	4.58
LA 2	748	3	4	1	4.31
LA 2	748	3	4	2	2.7
LA 2	748	3	4	3	3.73
LA 2	748	3	4	4	3.61
LA 2	9401	1	4	1	16.94
LA 2	9401	1	4	2	14.23
LA 2	9401	1	4	3	14.82
LA 2	9401	1	4	4	19.77
LA 2	9401	2	4	1	15.14
LA 2	9401	2	4	2	18.05
LA 2	9401	2	4	3	16.82
LA 2	9401	2	4	4	20.44
LA 2	9401	3	4	1	16
LA 2	9401	3	4	2	19
LA 2	9401	3	4	3	16.94
LA 2	9401	3	4	4	21.6
LA 2	9174	1	4	1	13.86
LA 2	9174	1	4	2	12.83
LA 2	9174	1	4	3	12.23
LA 2	9174	1	4	4	13.93
LA 2	9174	2	4	1	13.26
LA 2	9174	2	4	2	12.88
LA 2	9174	2	4	3	13.08
LA 2	9174	2	4	4	13.68
LA 2	9174	3	4	1	14.37
LA 2	9174	3	4	2	13.47
LA 2	9174	3	4	3	13.4
LA 2	9174	3	4	4	14.03
LA 2	9732	1	4	1	0
LA 2	9732	1	4	2	5
LA 2	9732	1	4	3	3.48
LA 2	9732	1	4	4	2.58
LA 2	9732	2	4	1	6.53
LA 2	9732	2	4	2	6.58
LA 2	9732	2	4	3	2.95
LA 2	9732	2	4	4	3.64
LA 2	9732	3	4	1	4.87
LA 2	9732	3	4	2	5.35
LA 2	9732	3	4	3	7
LA 2	9732	3	4	4	5.64
LA 2	9714	1	4	1	4.4
LA 2	9714	1	4	2	4.85
LA 2	9714	1	4	3	5.5
LA 2	9714	1	4	4	7.17
LA 2	9714	2	4	1	5.82
LA 2	9714	2	4	2	7
LA 2	9714	2	4	3	5
LA 2	9714	2	4	4	3.55
LA 2	9714	3	4	1	2.07
LA 2	9714	3	4	2	2.84
LA 2	9714	3	4	3	2.68
LA 2	9714	3	4	4	2.19
LA 2	0006	1	4	1	15.24
LA 2	0006	1	4	2	14.54
LA 2	0006	1	4	3	15.45
LA 2	0006	1	4	4	15.07
LA 2	0006	2	4	1	15.3
LA 2	0006	2	4	2	15.5
LA 2	0006	2	4	3	15.75
LA 2	0006	2	4	4	15.03
LA 2	0006	3	4	1	16.01
LA 2	0006	3	4	2	14.91
LA 2	0006	3	4	3	14.47
LA 2	0006	3	4	4	14.08
LA 2	254-2	1	4	1	8.66
LA 2	254-2	1	4	2	9.41
LA 2	254-2	1	4	3	7.38
LA 2	254-2	1	4	4	7.69
LA 2	254-2	2	4	1	8.77
LA 2	254-2	2	4	2	8.35
LA 2	254-2	2	4	3	7.82
LA 2	254-2	2	4	4	9.67
LA 2	254-2	3	4	1	7.49
LA 2	254-2	3	4	2	7.31
LA 2	254-2	3	4	3	8.09
LA 2	254-2	3	4	4	6.97
LA 2	254-8	1	4	1	16.67
LA 2	254-8	1	4	2	15.52
LA 2	254-8	1	4	3	17
LA 2	254-8	1	4	4	16.17
LA 2	254-8	2	4	1	16.71
LA 2	254-8	2	4	2	17.5
LA 2	254-8	2	4	3	18.04
LA 2	254-8	2	4	4	21.11
LA 2	254-8	3	4	1	19.08
LA 2	254-8	3	4	2	16.06
LA 2	254-8	3	4	3	12
LA 2	254-8	3	4	4	17.1
LA 2	254-11	1	4	1	10.25
LA 2	254-11	1	4	2	15
LA 2	254-11	1	4	3	12.8
LA 2	254-11	1	4	4	16.42
LA 2	254-11	2	4	1	15
LA 2	254-11	2	4	2	13.28
LA 2	254-11	2	4	3	13.16
LA 2	254-11	2	4	4	13.54
LA 2	254-11	3	4	1	13.4
LA 2	254-11	3	4	2	11.6
LA 2	254-11	3	4	3	12.3
LA 2	254-11	3	4	4	11.8
L 1	9610	1	4	1	5.95
L 1	9610	1	4	2	6.18
L 1	9610	1	4	3	6.03
L 1	9610	1	4	4	6.28
L 1	9610	2	4	1	6.2
L 1	9610	2	4	2	7.02
L 1	9610	2	4	3	5.93
L 1	9610	2	4	4	5.85
L 1	9610	3	4	1	6.19
L 1	9610	3	4	2	6.38
L 1	9610	3	4	3	5.78
L 1	9610	3	4	4	5.95
L 1	9612	1	4	1	5.26
L 1	9612	1	4	2	5
L 1	9612	1	4	3	2.47
L 1	9612	1	4	4	4.56
L 1	9612	2	4	1	5.57
L 1	9612	2	4	2	5.37
L 1	9612	2	4	3	0.5
L 1	9612	2	4	4	2.3
L 1	9612	3	4	1	4.9
L 1	9612	3	4	2	4.67
L 1	9612	3	4	3	5.64
L 1	9612	3	4	4	4.55
L 1	9605	1	4	1	2.34
L 1	9605	1	4	2	2.37
L 1	9605	1	4	3	2.93
L 1	9605	1	4	4	2.53
L 1	9605	2	4	1	2.93
L 1	9605	2	4	2	2.64
L 1	9605	2	4	3	2.84
L 1	9605	2	4	4	2.16
L 1	9605	3	4	1	2.86
L 1	9605	3	4	2	2.56
L 1	9605	3	4	3	3.1
L 1	9605	3	4	4	2.26
L 1	748	1	4	1	3.41
L 1	748	1	4	2	4.12
L 1	748	1	4	3	4.28
L 1	748	1	4	4	3.69
L 1	748	2	4	1	4.71
L 1	748	2	4	2	4.03
L 1	748	2	4	3	3.85
L 1	748	2	4	4	4.19
L 1	748	3	4	1	4.96
L 1	748	3	4	2	5.18
L 1	748	3	4	3	4.56
L 1	748	3	4	4	5.77
L 1	9401	1	4	1	4.56
L 1	9401	1	4	2	4.62
L 1	9401	1	4	3	6.32
L 1	9401	1	4	4	4.93
L 1	9401	2	4	1	3.8
L 1	9401	2	4	2	4.62
L 1	9401	2	4	3	6.24
L 1	9401	2	4	4	4.74
L 1	9401	3	4	1	5.14
L 1	9401	3	4	2	5.86
L 1	9401	3	4	3	5.77
L 1	9401	3	4	4	10.13
L 1	9174	1	4	1	5.21
L 1	9174	1	4	2	4.86
L 1	9174	1	4	3	5.8
L 1	9174	1	4	4	2.71
L 1	9174	2	4	1	3
L 1	9174	2	4	2	5.21
L 1	9174	2	4	3	3.55
L 1	9174	2	4	4	2.8
L 1	9174	3	4	1	4
L 1	9174	3	4	2	3.64
L 1	9174	3	4	3	4.33
L 1	9174	3	4	4	3.22
L 1	9732	1	4	1	2.8
L 1	9732	1	4	2	3.48
L 1	9732	1	4	3	3.35
L 1	9732	1	4	4	3.44
L 1	9732	2	4	1	5.03
L 1	9732	2	4	2	5.48
L 1	9732	2	4	3	0
L 1	9732	2	4	4	4.61
L 1	9732	3	4	1	4.11
L 1	9732	3	4	2	6.55
L 1	9732	3	4	3	3
L 1	9732	3	4	4	0
L 1	9714	1	4	1	2.72
L 1	9714	1	4	2	1.52
L 1	9714	1	4	3	1.42
L 1	9714	1	4	4	2.96
L 1	9714	2	4	1	2.31
L 1	9714	2	4	2	0
L 1	9714	2	4	3	3.19
L 1	9714	2	4	4	2.77
L 1	9714	3	4	1	2.77
L 1	9714	3	4	2	2.05
L 1	9714	3	4	3	1.68
L 1	9714	3	4	4	2.81
L 1	0006	1	4	1	2.22
L 1	0006	1	4	2	4.83
L 1	0006	1	4	3	6.22
L 1	0006	1	4	4	3.89
L 1	0006	2	4	1	3.83
L 1	0006	2	4	2	3.53
L 1	0006	2	4	3	1.43
L 1	0006	2	4	4	2.54
L 1	0006	3	4	1	4.18
L 1	0006	3	4	2	5.21
L 1	0006	3	4	3	5.04
L 1	0006	3	4	4	5.08
L 1	254-2	1	4	1	3.19
L 1	254-2	1	4	2	6.69
L 1	254-2	1	4	3	3.19
L 1	254-2	1	4	4	3.02
L 1	254-2	2	4	1	7.65
L 1	254-2	2	4	2	7.3
L 1	254-2	2	4	3	6.64
L 1	254-2	2	4	4	5.32
L 1	254-2	3	4	1	5.06
L 1	254-2	3	4	2	3
L 1	254-2	3	4	3	3.8
L 1	254-2	3	4	4	5.49
L 1	254-8	1	4	1	4.8
L 1	254-8	1	4	2	8.12
L 1	254-8	1	4	3	6.7
L 1	254-8	1	4	4	3.65
L 1	254-8	2	4	1	9.2
L 1	254-8	2	4	2	9.49
L 1	254-8	2	4	3	8.94
L 1	254-8	2	4	4	7.13
L 1	254-8	3	4	1	7.86
L 1	254-8	3	4	2	7.64
L 1	254-8	3	4	3	9.65
L 1	254-8	3	4	4	8.12
L 1	254-11	1	4	1	8.41
L 1	254-11	1	4	2	8.96
L 1	254-11	1	4	3	9.18
L 1	254-11	1	4	4	9.03
L 1	254-11	2	4	1	8.15
L 1	254-11	2	4	2	9.07
L 1	254-11	2	4	3	9.15
L 1	254-11	2	4	4	8.56
L 1	254-11	3	4	1	9.05
L 1	254-11	3	4	2	8.17
L 1	254-11	3	4	3	8.39
L 1	254-11	3	4	4	7.78
L 2	9610	1	4	1	7.07
L 2	9610	1	4	2	6.58
L 2	9610	1	4	3	6.55
L 2	9610	1	4	4	6.13
L 2	9610	2	4	1	6.91
L 2	9610	2	4	2	5.68
L 2	9610	2	4	3	5.3
L 2	9610	2	4	4	6.05
L 2	9610	3	4	1	7.45
L 2	9610	3	4	2	7.05
L 2	9610	3	4	3	6
L 2	9610	3	4	4	5.53
L 2	9612	1	4	1	4.6
L 2	9612	1	4	2	2.7
L 2	9612	1	4	3	4.3
L 2	9612	1	4	4	2.18
L 2	9612	2	4	1	4.18
L 2	9612	2	4	2	3.88
L 2	9612	2	4	3	0
L 2	9612	2	4	4	3.15
L 2	9612	3	4	1	2.56
L 2	9612	3	4	2	2.41
L 2	9612	3	4	3	3.65
L 2	9612	3	4	4	2.8
L 2	9605	1	4	1	6.2
L 2	9605	1	4	2	2.63
L 2	9605	1	4	3	2.33
L 2	9605	1	4	4	3.17
L 2	9605	2	4	1	3.63
L 2	9605	2	4	2	3.49
L 2	9605	2	4	3	3.15
L 2	9605	2	4	4	3.38
L 2	9605	3	4	1	4
L 2	9605	3	4	2	4.47
L 2	9605	3	4	3	4.29
L 2	9605	3	4	4	3.52
L 2	748	1	4	1	3.11
L 2	748	1	4	2	4.3
L 2	748	1	4	3	3.7
L 2	748	1	4	4	4.33
L 2	748	2	4	1	4.18
L 2	748	2	4	2	4.37
L 2	748	2	4	3	4.03
L 2	748	2	4	4	3.75
L 2	748	3	4	1	6
L 2	748	3	4	2	4.8
L 2	748	3	4	3	3.7
L 2	748	3	4	4	3.9
L 2	9401	1	4	1	6.4
L 2	9401	1	4	2	6.44
L 2	9401	1	4	3	7.45
L 2	9401	1	4	4	7.33
L 2	9401	2	4	1	6.17
L 2	9401	2	4	2	5.88
L 2	9401	2	4	3	6.27
L 2	9401	2	4	4	5.9
L 2	9401	3	4	1	6.49
L 2	9401	3	4	2	7.24
L 2	9401	3	4	3	7.46
L 2	9401	3	4	4	6.76
L 2	9174	1	4	1	1.85
L 2	9174	1	4	2	2.97
L 2	9174	1	4	3	0
L 2	9174	1	4	4	3.12
L 2	9174	2	4	1	0
L 2	9174	2	4	2	3.25
L 2	9174	2	4	3	3.74
L 2	9174	2	4	4	3.35
L2	9174	3	4	1	3.82
L 2	9174	3	4	2	3.58
L 2	9174	3	4	3	5.82
L 2	9174	3	4	4	0
L 2	9732	1	4	1	3.13
L 2	9732	1	4	2	1.2
L 2	9732	1	4	3	2.5
L 2	9732	1	4	4	2.09
L 2	9732	2	4	1	1.9
L 2	9732	2	4	2	2.06
L 2	9732	2	4	3	1.3
L 2	9732	2	4	4	2.08
L 2	9732	3	4	1	1.82
L 2	9732	3	4	2	2.15
L 2	9732	3	4	3	2.23
L 2	9732	3	4	4	1.86
L 2	9714	1	4	1	6
L 2	9714	1	4	2	6.51
L 2	9714	1	4	3	5.85
L 2	9714	1	4	4	6.14
L 2	9714	2	4	1	4.96
L 2	9714	2	4	2	2.77
L 2	9714	2	4	3	3.85
L 2	9714	2	4	4	3.59
L 2	9714	3	4	1	0
L 2	9714	3	4	2	4.91
L 2	9714	3	4	3	0
L 2	9714	3	4	4	3.78
L 2	0006	1	4	1	7.5
L 2	0006	1	4	2	7
L 2	0006	1	4	3	7.58
L 2	0006	1	4	4	7.89
L 2	0006	2	4	1	7.52
L 2	0006	2	4	2	6.51
L 2	0006	2	4	3	7.06
L 2	0006	2	4	4	7.47
L 2	0006	3	4	1	7.76
L 2	0006	3	4	2	8.29
L 2	0006	3	4	3	7.65
L 2	0006	3	4	4	7.84
L 2	254-2	1	4	1	7.7
L 2	254-2	1	4	2	5
L 2	254-2	1	4	3	6.46
L 2	254-2	1	4	4	10.34
L 2	254-2	2	4	1	9.3
L 2	254-2	2	4	2	8.4
L 2	254-2	2	4	3	4
L 2	254-2	2	4	4	7.1
L 2	254-2	3	4	1	8.14
L 2	254-2	3	4	2	9.31
L 2	254-2	3	4	3	6.13
L 2	254-2	3	4	4	8.87
L 2	254-8	1	4	1	5.45
L 2	254-8	1	4	2	6.41
L 2	254-8	1	4	3	7.36
L 2	254-8	1	4	4	6.22
L 2	254-8	2	4	1	7.17
L 2	254-8	2	4	2	6.8
L 2	254-8	2	4	3	7.11
L 2	254-8	2	4	4	7.73
L 2	254-8	3	4	1	7.96
L 2	254-8	3	4	2	7.54
L 2	254-8	3	4	3	7.61
L 2	254-8	3	4	4	8.51
L 2	254-11	1	4	1	6.02
L 2	254-11	1	4	2	5.05
L 2	254-11	1	4	3	4.76
L 2	254-11	1	4	4	5.23
L 2	254-11	2	4	1	7
L 2	254-11	2	4	2	7.62
L 2	254-11	2	4	3	4.86
L 2	254-11	2	4	4	5.7
L 2	254-11	3	4	1	6
L 2	254-11	3	4	2	5.43
L 2	254-11	3	4	3	5.46
L 2	254-11	3	4	4	5.91
L 3	9610	1	4	1	8.76
L 3	9610	1	4	2	8.12
L 3	9610	1	4	3	8.89
L 3	9610	1	4	4	9.03
L 3	9610	2	4	1	8.01
L 3	9610	2	4	2	8.64
L 3	9610	2	4	3	9.11
L 3	9610	2	4	4	8.36
L 3	9610	3	4	1	7.95
L 3	9610	3	4	2	8.3
L 3	9610	3	4	3	7.48
L 3	9610	3	4	4	7.43
L 3	9612	1	4	1	5.9
L 3	9612	1	4	2	5.4
L 3	9612	1	4	3	6.47
L 3	9612	1	4	4	5.76
L 3	9612	2	4	1	3.92
L 3	9612	2	4	2	5.52
L 3	9612	2	4	3	4.5
L 3	9612	2	4	4	5.18
L 3	9612	3	4	1	4.45
L 3	9612	3	4	2	4.1
L 3	9612	3	4	3	3.62
L 3	9612	3	4	4	5.75
L 3	9605	1	4	1	6.41
L 3	9605	1	4	2	6.87
L 3	9605	1	4	3	5.49
L 3	9605	1	4	4	6.45
L 3	9605	2	4	1	7.25
L 3	9605	2	4	2	7.6
L 3	9605	2	4	3	7.2
L 3	9605	2	4	4	7.06
L 3	9605	3	4	1	6.4
L 3	9605	3	4	2	5.91
L 3	9605	3	4	3	7.43
L 3	9605	3	4	4	6.26
L 3	748	1	4	1	6.56
L 3	748	1	4	2	7.28
L 3	748	1	4	3	6.94
L 3	748	1	4	4	8.18
L 3	748	2	4	1	7.89
L 3	748	2	4	2	7.81
L 3	748	2	4	3	6.38
L 3	748	2	4	4	8.07
L 3	748	3	4	1	7.19
L 3	748	3	4	2	7.08
L 3	748	3	4	3	6.33
L 3	748	3	4	4	6.87
L 3	9401	1	4	1	11.25
L 3	9401	1	4	2	10.5
L 3	9401	1	4	3	10.07
L 3	9401	1	4	4	10.28
L 3	9401	2	4	1	8.03
L 3	9401	2	4	2	9.7
L 3	9401	2	4	3	10.49
L 3	9401	2	4	4	10.24
L 3	9401	3	4	1	9.61
L 3	9401	3	4	2	10.62
L 3	9401	3	4	3	10.9
L 3	9401	3	4	4	11.04
L 3	9174	1	4	1	3.5
L 3	9174	1	4	2	5.26
L 3	9174	1	4	3	4.23
L 3	9174	1	4	4	4.04
L 3	9174	2	4	1	3.88
L 3	9174	2	4	2	5.14
L 3	9174	2	4	3	3.16
L 3	9174	2	4	4	2.77
L 3	9174	3	4	1	3.69
L 3	9174	3	4	2	3.05
L 3	9174	3	4	3	2.56
L 3	9174	3	4	4	3.32
L 3	9732	1	4	1	7.2
L 3	9732	1	4	2	6.6
L 3	9732	1	4	3	6.3
L 3	9732	1	4	4	6.5
L 3	9732	2	4	1	7.45
L 3	9732	2	4	2	7
L 3	9732	2	4	3	6.68
L 3	9732	2	4	4	6.98
L 3	9732	3	4	1	4.33
L 3	9732	3	4	2	5.3
L 3	9732	3	4	3	6.77
L 3	9732	3	4	4	5.52
L 3	9714	1	4	1	3.48
L 3	9714	1	4	2	3.68
L 3	9714	1	4	3	3.41
L 3	9714	1	4	4	2.12
L 3	9714	2	4	1	1.28
L 3	9714	2	4	2	0
L 3	9714	2	4	3	3.77
L 3	9714	2	4	4	3.21
L 3	9714	3	4	1	3.15
L 3	9714	3	4	2	3.22
L 3	9714	3	4	3	3.71
L 3	9714	3	4	4	3.62
L 3	0006	1	4	1	7.52
L 3	0006	1	4	2	7.32
L 3	0006	1	4	3	7.82
L 3	0006	1	4	4	8.09
L 3	0006	2	4	1	9.62
L 3	0006	2	4	2	9.02
L 3	0006	2	4	3	9.14
L 3	0006	2	4	4	9.19
L 3	0006	3	4	1	7.7
L 3	0006	3	4	2	8.12
L 3	0006	3	4	3	8.39
L 3	0006	3	4	4	8.32
L 3	254-2	1	4	1	6.02
L 3	254-2	1	4	2	5.68
L 3	254-2	1	4	3	3.27
L 3	254-2	1	4	4	5.27
L 3	254-2	2	4	1	4.76
L 3	254-2	2	4	2	6.24
L 3	254-2	2	4	3	6.91
L 3	254-2	2	4	4	6.92
L 3	254-2	3	4	1	4.74
L 3	254-2	3	4	2	5.88
L 3	254-2	3	4	3	4.15
L 3	254-2	3	4	4	4.87
L 3	254-8	1	4	1	8.6
L 3	254-8	1	4	2	9.06
L 3	254-8	1	4	3	8.88
L 3	254-8	1	4	4	7.9
L 3	254-8	2	4	1	6.87
L 3	254-8	2	4	2	8.05
L 3	254-8	2	4	3	7.7
L 3	254-8	2	4	4	7.5
L 3	254-8	3	4	1	7.03
L 3	254-8	3	4	2	8.34
L 3	254-8	3	4	3	7
L 3	254-8	3	4	4	7.58
L 3	254-11	1	4	1	9.59
L 3	254-11	1	4	2	9.85
L 3	254-11	1	4	3	10
L 3	254-11	1	4	4	9.72
L 3	254-11	2	4	1	9.12
L 3	254-11	2	4	2	9.3
L 3	254-11	2	4	3	8.88
L 3	254-11	2	4	4	8.3
L 3	254-11	3	4	1	9.56
L 3	254-11	3	4	2	10.26
L 3	254-11	3	4	3	10.2
L 3	254-11	3	4	4	2.78
LO 2	9610	1	4	1	6.06
LO 2	9610	1	4	2	4.63
LO 2	9610	1	4	3	7.25
LO 2	9610	1	4	4	7.52
LO 2	9610	2	4	1	6.85
LO 2	9610	2	4	2	6.5
LO 2	9610	2	4	3	5.73
LO 2	9610	2	4	4	5.85
LO 2	9610	3	4	1	5.15
LO 2	9610	3	4	2	6
LO 2	9610	3	4	3	8.33
LO 2	9610	3	4	4	6.68
LO 2	9612	1	4	1	2.01
LO 2	9612	1	4	2	2.82
LO 2	9612	1	4	3	2.49
LO 2	9612	1	4	4	0
LO 2	9612	2	4	1	4.23
LO 2	9612	2	4	2	0.9
LO 2	9612	2	4	3	3.39
LO 2	9612	2	4	4	0.7
LO 2	9612	3	4	1	0.8
LO 2	9612	3	4	2	3.12
LO 2	9612	3	4	3	3.41
LO 2	9612	3	4	4	3.11
LO 2	9605	1	4	1	4.3
LO 2	9605	1	4	2	4.2
LO 2	9605	1	4	3	4.82
LO 2	9605	1	4	4	2.61
LO 2	9605	2	4	1	3.8
LO 2	9605	2	4	2	4.43
LO 2	9605	2	4	3	4.18
LO 2	9605	2	4	4	3.85
LO 2	9605	3	4	1	5
LO 2	9605	3	4	2	6
LO 2	9605	3	4	3	6.7
LO 2	9605	3	4	4	4.2
LO 2	748	1	4	1	3.3
LO 2	748	1	4	2	4.11
LO 2	748	1	4	3	3.05
LO 2	748	1	4	4	3.46
LO 2	748	2	4	1	4.14
LO 2	748	2	4	2	3.63
LO 2	748	2	4	3	3.69
LO 2	748	2	4	4	3.71
LO 2	748	3	4	1	4.53
LO 2	748	3	4	2	4.92
LO 2	748	3	4	3	4.45
LO 2	748	3	4	4	4.8
LO 2	9401	1	4	1	10.87
LO 2	9401	1	4	2	11.09
LO 2	9401	1	4	3	10.5
LO 2	9401	1	4	4	10.57
LO 2	9401	2	4	1	7.5
LO 2	9401	2	4	2	5.54
LO 2	9401	2	4	3	5.8
LO 2	9401	2	4	4	6.27
LO 2	9401	3	4	1	9
LO 2	9401	3	4	2	9.91
LO 2	9401	3	4	3	9.95
LO 2	9401	3	4	4	10.64
LO 2	9174	1	4	1	7.43
LO 2	9174	1	4	2	7.16
LO 2	9174	1	4	3	7.63
LO 2	9174	1	4	4	6.11
LO 2	9174	2	4	1	6.58
LO 2	9174	2	4	2	5.51
LO 2	9174	2	4	3	6.46
LO 2	9174	2	4	4	6.71
LO 2	9174	3	4	1	5.18
LO 2	9174	3	4	2	5.47
LO 2	9174	3	4	3	5.88
LO 2	9174	3	4	4	4.22
LO 2	9732	1	4	1	2.9
LO 2	9732	1	4	2	3.6
LO 2	9732	1	4	3	3.1
LO 2	9732	1	4	4	3.55
LO 2	9732	2	4	1	3.74
LO 2	9732	2	4	2	3
LO 2	9732	2	4	3	2.7
LO 2	9732	2	4	4	3.56
LO 2	9732	3	4	1	3.8
LO 2	9732	3	4	2	3.9
LO 2	9732	3	4	3	3.93
LO 2	9732	3	4	4	3.55
LO 2	9714	1	4	1	2.08
LO 2	9714	1	4	2	3.15
LO 2	9714	1	4	3	2.4
LO 2	9714	1	4	4	2.32
LO 2	9714	2	4	1	3.41
LO 2	9714	2	4	2	2.68
LO 2	9714	2	4	3	2.07
LO 2	9714	2	4	4	1.84
LO 2	9714	3	4	1	3.39
LO 2	9714	3	4	2	3.53
LO 2	9714	3	4	3	4.46
LO 2	9714	3	4	4	4.51
LO 2	0006	1	4	1	6.98
LO 2	0006	1	4	2	7.91
LO 2	0006	1	4	3	7.22
LO 2	0006	1	4	4	7.31
LO 2	0006	2	4	1	7.57
LO 2	0006	2	4	2	7.09
LO 2	0006	2	4	3	7.52
LO 2	0006	2	4	4	6.58
LO 2	0006	3	4	1	7
LO 2	0006	3	4	2	6.91
LO 2	0006	3	4	3	6.9
LO 2	0006	3	4	4	6.48
LO 2	254-2	1	4	1	3.73
LO 2	254-2	1	4	2	5.8
LO 2	254-2	1	4	3	0
LO 2	254-2	1	4	4	2.42
LO 2	254-2	2	4	1	4.49
LO 2	254-2	2	4	2	2.88
LO 2	254-2	2	4	3	3.44
LO 2	254-2	2	4	4	6.2
LO 2	254-2	3	4	1	1.43
LO 2	254-2	3	4	2	5.65
LO 2	254-2	3	4	3	5.23
LO 2	254-2	3	4	4	0
LO 2	254-8	1	4	1	9.6
LO 2	254-8	1	4	2	7.6
LO 2	254-8	1	4	3	8.11
LO 2	254-8	1	4	4	7.86
LO 2	254-8	2	4	1	6.51
LO 2	254-8	2	4	2	6.85
LO 2	254-8	2	4	3	6.95
LO 2	254-8	2	4	4	6.97
LO 2	254-8	3	4	1	6.43
LO 2	254-8	3	4	2	7.23
LO 2	254-8	3	4	3	7.11
LO 2	254-8	3	4	4	6.34
LO 2	254-11	1	4	1	6.25
LO 2	254-11	1	4	2	6.62
LO 2	254-11	1	4	3	6.51
LO 2	254-11	1	4	4	7
LO 2	254-11	2	4	1	6.46
LO 2	254-11	2	4	2	6.48
LO 2	254-11	2	4	3	5.88
LO 2	254-11	2	4	4	5.64
LO 2	254-11	3	4	1	5.79
LO 2	254-11	3	4	2	6.83
LO 2	254-11	3	4	3	6.28
LO 2	254-11	3	4	4	7.21
LO 1	9610	1	4	1	4.58
LO 1	9610	1	4	2	4.95
LO 1	9610	1	4	3	3.5
LO 1	9610	1	4	4	5.76
LO 1	9610	2	4	1	4.82
LO 1	9610	2	4	2	4.4
LO 1	9610	2	4	3	5.15
LO 1	9610	2	4	4	5.78
LO 1	9610	3	4	1	5.61
LO 1	9610	3	4	2	5.06
LO 1	9610	3	4	3	5.7
LO 1	9610	3	4	4	5.85
LO 1	9612	1	4	1	2.12
LO 1	9612	1	4	2	2.83
LO 1	9612	1	4	3	1.68
LO 1	9612	1	4	4	2.26
LO 1	9612	2	4	1	0.46
LO 1	9612	2	4	2	0.51
LO 1	9612	2	4	3	1.84
LO 1	9612	2	4	4	0
LO 1	9612	3	4	1	1.45
LO 1	9612	3	4	2	2.27
LO 1	9612	3	4	3	2.21
LO 1	9612	3	4	4	1.86
LO 1	9605	1	4	1	5.35
LO 1	9605	1	4	2	5.3
LO 1	9605	1	4	3	5.23
LO 1	9605	1	4	4	3.16
LO 1	9605	2	4	1	5.42
LO 1	9605	2	4	2	1.9
LO 1	9605	2	4	3	5.43
LO 1	9605	2	4	4	5.71
LO 1	9605	3	4	1	3.43
LO 1	9605	3	4	2	4.85
LO 1	9605	3	4	3	4.42
LO 1	9605	3	4	4	4.68
LO 1	748	1	4	1	3.03
LO 1	748	1	4	2	3.13
LO 1	748	1	4	3	2.12
LO 1	748	1	4	4	4.68
LO 1	748	2	4	1	3.11
LO 1	748	2	4	2	3.03
LO 1	748	2	4	3	3.75
LO 1	748	2	4	4	1.5
LO 1	748	3	4	1	3.42
LO 1	748	3	4	2	2.19
LO 1	748	3	4	3	3.5
LO 1	748	3	4	4	3.95
LO 1	9401	1	4	1	8
LO 1	9401	1	4	2	3
LO 1	9401	1	4	3	9
LO 1	9401	1	4	4	2
LO 1	9401	2	4	1	8.87
LO 1	9401	2	4	2	6.5
LO 1	9401	2	4	3	7.04
LO 1	9401	2	4	4	7.63
LO 1	9401	3	4	1	7.02
LO 1	9401	3	4	2	6.87
LO 1	9401	3	4	3	5.39
LO 1	9401	3	4	4	6.49
LO 1	9174	1	4	1	5.57
LO 1	9174	1	4	2	5.41
LO 1	9174	1	4	3	5.3
LO 1	9174	1	4	4	3.7
LO 1	9174	2	4	1	4.79
LO 1	9174	2	4	2	3.52
LO 1	9174	2	4	3	3.72
LO 1	9174	2	4	4	3.7
LO 1	9174	3	4	1	4.62
LO 1	9174	3	4	2	4.41
LO 1	9174	3	4	3	4.65
LO 1	9174	3	4	4	5.15
LO 1	9732	1	4	1	2.16
LO 1	9732	1	4	2	3.02
LO 1	9732	1	4	3	2.85
LO 1	9732	1	4	4	2.67
LO 1	9732	2	4	1	3.22
LO 1	9732	2	4	2	3.17
LO 1	9732	2	4	3	3.08
LO 1	9732	2	4	4	1.9
LO 1	9732	3	4	1	1.8
LO 1	9732	3	4	2	1.42
LO 1	9732	3	4	3	2.43
LO 1	9732	3	4	4	2.37
LO 1	9714	1	4	1	4.09
LO 1	9714	1	4	2	4.99
LO 1	9714	1	4	3	0
LO 1	9714	1	4	4	0
LO 1	9714	2	4	1	2.7
LO 1	9714	2	4	2	1.5
LO 1	9714	2	4	3	2.61
LO 1	9714	2	4	4	0
LO 1	9714	3	4	1	4.61
LO 1	9714	3	4	2	3.58
LO 1	9714	3	4	3	6.31
LO 1	9714	3	4	4	2.67
LO 1	0006	1	4	1	6.69
LO 1	0006	1	4	2	5.58
LO 1	0006	1	4	3	7.29
LO 1	0006	1	4	4	6.87
LO 1	0006	2	4	1	4.51
LO 1	0006	2	4	2	2.68
LO 1	0006	2	4	3	1.59
LO 1	0006	2	4	4	3.56
LO 1	0006	3	4	1	4.8
LO 1	0006	3	4	2	5
LO 1	0006	3	4	3	4.3
LO 1	0006	3	4	4	4.37
LO 1	254-2	1	4	1	8.23
LO 1	254-2	1	4	2	0
LO 1	254-2	1	4	3	0
LO 1	254-2	1	4	4	7.15
LO 1	254-2	2	4	1	7.57
LO 1	254-2	2	4	2	8.21
LO 1	254-2	2	4	3	7.31
LO 1	254-2	2	4	4	8.7
LO 1	254-2	3	4	1	1.7
LO 1	254-2	3	4	2	5
LO 1	254-2	3	4	3	5.8
LO 1	254-2	3	4	4	6.55
LO 1	254-8	1	4	1	4.8
LO 1	254-8	1	4	2	7.12
LO 1	254-8	1	4	3	6.7
LO 1	254-8	1	4	4	3.65
LO 1	254-8	2	4	1	8.2
LO 1	254-8	2	4	2	8.49
LO 1	254-8	2	4	3	8.94
LO 1	254-8	2	4	4	7.13
LO 1	254-8	3	4	1	7.86
LO 1	254-8	3	4	2	7.64
LO 1	254-8	3	4	3	8.65
LO 1	254-8	3	4	4	8.12
LO 1	254-11	1	4	1	7
LO 1	254-11	1	4	2	6.5
LO 1	254-11	1	4	3	6.4
LO 1	254-11	1	4	4	6.2
LO 1	254-11	2	4	1	7
LO 1	254-11	2	4	2	6.6
LO 1	254-11	2	4	3	6.8
LO 1	254-11	2	4	4	6.15
LO 1	254-11	3	4	1	6.9
LO 1	254-11	3	4	2	6.3
LO 1	254-11	3	4	3	6.6
LO 1	254-11	3	4	4	6.9
OT 1	9610	1	4	1	2.52
OT 1	9610	1	4	2	4.85
OT 1	9610	1	4	3	3.9
OT 1	9610	1	4	4	5.55
OT 1	9610	2	4	1	2.41
OT 1	9610	2	4	2	5.53
OT 1	9610	2	4	3	1.87
OT 1	9610	2	4	4	2.31
OT 1	9610	3	4	1	2.19
OT 1	9610	3	4	2	2.1
OT 1	9610	3	4	3	3.35
OT 1	9610	3	4	4	2.34
OT 1	9612	1	4	1	1.05
OT 1	9612	1	4	2	1.22
OT 1	9612	1	4	3	1.71
OT 1	9612	1	4	4	1.43
OT 1	9612	2	4	1	0
OT 1	9612	2	4	2	1.23
OT 1	9612	2	4	3	1.25
OT 1	9612	2	4	4	1.9
OT 1	9612	3	4	1	1.74
OT 1	9612	3	4	2	1.4
OT 1	9612	3	4	3	0
OT 1	9612	3	4	4	1.23
OT 1	9605	1	4	1	3.24
OT 1	9605	1	4	2	1.4
OT 1	9605	1	4	3	2.04
OT 1	9605	1	4	4	1.73
OT 1	9605	2	4	1	4.14
OT 1	9605	2	4	2	4.28
OT 1	9605	2	4	3	2.45
OT 1	9605	2	4	4	5.1
OT 1	9605	3	4	1	2.84
OT 1	9605	3	4	2	2.38
OT 1	9605	3	4	3	6
OT 1	9605	3	4	4	1.8
OT 1	748	1	4	1	4.5
OT 1	748	1	4	2	0
OT 1	748	1	4	3	2.12
OT 1	748	1	4	4	3.42
OT 1	748	2	4	1	2.64
OT 1	748	2	4	2	2.03
OT 1	748	2	4	3	1.88
OT 1	748	2	4	4	2.26
OT 1	748	3	4	1	3.52
OT 1	748	3	4	2	2.09
OT 1	748	3	4	3	1.24
OT 1	748	3	4	4	2.17
OT 1	9401	1	4	1	18.44
OT 1	9401	1	4	2	19.12
OT 1	9401	1	4	3	14.47
OT 1	9401	1	4	4	16.31
OT 1	9401	2	4	1	12.83
OT 1	9401	2	4	2	16.77
OT 1	9401	2	4	3	17.61
OT 1	9401	2	4	4	16.3
OT 1	9401	3	4	1	17.18
OT 1	9401	3	4	2	18.9
OT 1	9401	3	4	3	17.4
OT 1	9401	3	4	4	16.7
OT 1	9174	1	4	1	14.52
OT 1	9174	1	4	2	13.32
OT 1	9174	1	4	3	13.56
OT 1	9174	1	4	4	13.22
OT 1	9174	2	4	1	16.62
OT 1	9174	2	4	2	15.06
OT 1	9174	2	4	3	15.02
OT 1	9174	2	4	4	15.56
OT 1	9174	3	4	1	15
OT 1	9174	3	4	2	15.53
OT 1	9174	3	4	3	14.42
OT 1	9174	3	4	4	14.75
OT 1	9732	1	4	1	1.92
OT 1	9732	1	4	2	1.48
OT 1	9732	1	4	3	1.67
OT 1	9732	1	4	4	1.87
OT 1	9732	2	4	1	1.97
OT 1	9732	2	4	2	1.64
OT 1	9732	2	4	3	1.71
OT 1	9732	2	4	4	2.18
OT 1	9732	3	4	1	2.32
OT 1	9732	3	4	2	2.07
OT 1	9732	3	4	3	2.24
OT 1	9732	3	4	4	1.8
OT 1	9714	1	4	1	2.29
OT 1	9714	1	4	2	1.49
OT 1	9714	1	4	3	2.74
OT 1	9714	1	4	4	1.95
OT 1	9714	2	4	1	1.26
OT 1	9714	2	4	2	1.63
OT 1	9714	2	4	3	3.83
OT 1	9714	2	4	4	1.38
OT 1	9714	3	4	1	4.83
OT 1	9714	3	4	2	1.24
OT 1	9714	3	4	3	1.44
OT 1	9714	3	4	4	1.42
OT 1	0006	1	4	1	14.42
OT 1	0006	1	4	2	15.7
OT 1	0006	1	4	3	14.4
OT 1	0006	1	4	4	13.11
OT 1	0006	2	4	1	14.8
OT 1	0006	2	4	2	14.98
OT 1	0006	2	4	3	13.83
OT 1	0006	2	4	4	12.92
OT 1	0006	3	4	1	15.08
OT 1	0006	3	4	2	14.6
OT 1	0006	3	4	3	12.2
OT 1	0006	3	4	4	13.37
OT 1	254-2	1	4	1	10.27
OT 1	254-2	1	4	2	9.9
OT 1	254-2	1	4	3	9.27
OT 1	254-2	1	4	4	10.13
OT 1	254-2	2	4	1	9.9
OT 1	254-2	2	4	2	8.84
OT 1	254-2	2	4	3	9.63
OT 1	254-2	2	4	4	9.17
OT 1	254-2	3	4	1	11.65
OT 1	254-2	3	4	2	9.96
OT 1	254-2	3	4	3	11.32
OT 1	254-2	3	4	4	11.55
OT 1	254-8	1	4	1	11.65
OT 1	254-8	1	4	2	9.82
OT 1	254-8	1	4	3	6.33
OT 1	254-8	1	4	4	12.15
OT 1	254-8	2	4	1	7.61
OT 1	254-8	2	4	2	9.68
OT 1	254-8	2	4	3	12.93
OT 1	254-8	2	4	4	6.47
OT 1	254-8	3	4	1	8.43
OT 1	254-8	3	4	2	11
OT 1	254-8	3	4	3	10.17
OT 1	254-8	3	4	4	10.98
OT 1	254-11	1	4	1	10.3
OT 1	254-11	1	4	2	12.07
OT 1	254-11	1	4	3	12.14
OT 1	254-11	1	4	4	11.62
OT 1	254-11	2	4	1	10.63
OT 1	254-11	2	4	2	9.97
OT 1	254-11	2	4	3	10
OT 1	254-11	2	4	4	8.7
OT 1	254-11	3	4	1	9.08
OT 1	254-11	3	4	2	9.03
OT 1	254-11	3	4	3	11.18
OT 1	254-11	3	4	4	9.09
OT 2	9610	1	4	1	2.92
OT 2	9610	1	4	2	1.74
OT 2	9610	1	4	3	1.84
OT 2	9610	1	4	4	4.32
OT 2	9610	2	4	1	2.08
OT 2	9610	2	4	2	3.74
OT 2	9610	2	4	3	3.02
OT 2	9610	2	4	4	3.37
OT 2	9610	3	4	1	1.41
OT 2	9610	3	4	2	2.98
OT 2	9610	3	4	3	2.7
OT 2	9610	3	4	4	0.8
OT 2	9612	1	4	1	2.89
OT 2	9612	1	4	2	3.68
OT 2	9612	1	4	3	2.45
OT 2	9612	1	4	4	1.96
OT 2	9612	2	4	1	3.39
OT 2	9612	2	4	2	1.68
OT 2	9612	2	4	3	1.94
OT 2	9612	2	4	4	2.87
OT 2	9612	3	4	1	1.31
OT 2	9612	3	4	2	1.26
OT 2	9612	3	4	3	1.97
OT 2	9612	3	4	4	2.15
OT 2	9605	1	4	1	2.18
OT 2	9605	1	4	2	1.66
OT 2	9605	1	4	3	7.2
OT 2	9605	1	4	4	3.94
OT 2	9605	2	4	1	1.73
OT 2	9605	2	4	2	1.42
OT 2	9605	2	4	3	2.43
OT 2	9605	2	4	4	3.85
OT 2	9605	3	4	1	4.1
OT 2	9605	3	4	2	0.7
OT 2	9605	3	4	3	0
OT 2	9605	3	4	4	3.48
OT 2	748	1	4	1	4.1
OT 2	748	1	4	2	4.46
OT 2	748	1	4	3	4.67
OT 2	748	1	4	4	3.77
OT 2	748	2	4	1	4.31
OT 2	748	2	4	2	4.92
OT 2	748	2	4	3	3.07
OT 2	748	2	4	4	4.56
OT 2	748	3	4	1	4.84
OT 2	748	3	4	2	3.97
OT 2	748	3	4	3	3.82
OT 2	748	3	4	4	3.36
OT 2	9401	1	4	1	7.65
OT 2	9401	1	4	2	6.12
OT 2	9401	1	4	3	5.48
OT 2	9401	1	4	4	6.59
OT 2	9401	2	4	1	4.15
OT 2	9401	2	4	2	7.86
OT 2	9401	2	4	3	2.39
OT 2	9401	2	4	4	7.19
OT 2	9401	3	4	1	9.41
OT 2	9401	3	4	2	8.65
OT 2	9401	3	4	3	8.82
OT 2	9401	3	4	4	7.17
OT 2	9174	1	4	1	6.84
OT 2	9174	1	4	2	6.91
OT 2	9174	1	4	3	7.64
OT 2	9174	1	4	4	6.73
OT 2	9174	2	4	1	6.84
OT 2	9174	2	4	2	7.78
OT 2	9174	2	4	3	5.76
OT 2	9174	2	4	4	6.95
OT 2	9174	3	4	1	9.47
OT 2	9174	3	4	2	8.61
OT 2	9174	3	4	3	8.82
OT 2	9174	3	4	4	7.17
OT 2	9732	1	4	1	3.92
OT 2	9732	1	4	2	2.3
OT 2	9732	1	4	3	1.8
OT 2	9732	1	4	4	4.65
OT 2	9732	2	4	1	0
OT 2	9732	2	4	2	2.06
OT 2	9732	2	4	3	2.33
OT 2	9732	2	4	4	2.78
OT 2	9732	3	4	1	3.24
OT 2	9732	3	4	2	2.14
OT 2	9732	3	4	3	3.59
OT 2	9732	3	4	4	4.23
OT 2	9714	1	4	1	5.18
OT 2	9714	1	4	2	5.34
OT 2	9714	1	4	3	6.12
OT 2	9714	1	4	4	5.31
OT 2	9714	2	4	1	3.18
OT 2	9714	2	4	2	0
OT 2	9714	2	4	3	0
OT 2	9714	2	4	4	2.06
OT 2	9714	3	4	1	0
OT 2	9714	3	4	2	9.09
OT 2	9714	3	4	3	0
OT 2	9714	3	4	4	0
OT 2	0006	1	4	1	11.3
OT 2	0006	1	4	2	12.3
OT 2	0006	1	4	3	9.01
OT 2	0006	1	4	4	12.35
OT 2	0006	2	4	1	13.06
OT 2	0006	2	4	2	11.15
OT 2	0006	2	4	3	12.07
OT 2	0006	2	4	4	13.15
OT 2	0006	3	4	1	10.25
OT 2	0006	3	4	2	10.4
OT 2	0006	3	4	3	12.12
OT 2	0006	3	4	4	13.68
OT 2	254-2	1	4	1	6.61
OT 2	254-2	1	4	2	10.4
OT 2	254-2	1	4	3	2.34
OT 2	254-2	1	4	4	4.41
OT 2	254-2	2	4	1	11.2
OT 2	254-2	2	4	2	6.15
OT 2	254-2	2	4	3	0
OT 2	254-2	2	4	4	8.45
OT 2	254-2	3	4	1	0
OT 2	254-2	3	4	2	0
OT 2	254-2	3	4	3	3.39
OT 2	254-2	3	4	4	8.4
OT 2	254-8	1	4	1	12.4
OT 2	254-8	1	4	2	8.7
OT 2	254-8	1	4	3	4.7
OT 2	254-8	1	4	4	10.2
OT 2	254-8	2	4	1	12.68
OT 2	254-8	2	4	2	9.27
OT 2	254-8	2	4	3	7.38
OT 2	254-8	2	4	4	7.11
OT 2	254-8	3	4	1	11.03
OT 2	254-8	3	4	2	7.28
OT 2	254-8	3	4	3	9.9
OT 2	254-8	3	4	4	6.62
OT 2	254-11	1	4	1	11.5
OT 2	254-11	1	4	2	9.14
OT 2	254-11	1	4	3	10.37
OT 2	254-11	1	4	4	9.67
OT 2	254-11	2	4	1	6.44
OT 2	254-11	2	4	2	4.15
OT 2	254-11	2	4	3	7.63
OT 2	254-11	2	4	4	3.54
OT 2	254-11	3	4	1	8.21
OT 2	254-11	3	4	2	3.45
OT 2	254-11	3	4	3	5.81
OT 2	254-11	3	4	4	6.63
OT 3	9610	1	4	1	7.9
OT 3	9610	1	4	2	8
OT 3	9610	1	4	3	8.19
OT 3	9610	1	4	4	7.58
OT 3	9610	2	4	1	7.73
OT 3	9610	2	4	2	7.22
OT 3	9610	2	4	3	7.51
OT 3	9610	2	4	4	7.07
OT 3	9610	3	4	1	7.5
OT 3	9610	3	4	2	7
OT 3	9610	3	4	3	7.83
OT 3	9610	3	4	4	8.18
OT 3	9612	1	4	1	2.8
OT 3	9612	1	4	2	2.94
OT 3	9612	1	4	3	2.78
OT 3	9612	1	4	4	2.96
OT 3	9612	2	4	1	2.14
OT 3	9612	2	4	2	3.24
OT 3	9612	2	4	3	2.47
OT 3	9612	2	4	4	2.16
OT 3	9612	3	4	1	2.32
OT 3	9612	3	4	2	2.24
OT 3	9612	3	4	3	2.57
OT 3	9612	3	4	4	2.56
OT 3	9605	1	4	1	5.6
OT 3	9605	1	4	2	5.23
OT 3	9605	1	4	3	5
OT 3	9605	1	4	4	6.5
OT 3	9605	2	4	1	4.95
OT 3	9605	2	4	2	4.7
OT 3	9605	2	4	3	5.34
OT 3	9605	2	4	4	6.71
OT 3	9605	3	4	1	2.12
OT 3	9605	3	4	2	1.79
OT 3	9605	3	4	3	1.73
OT 3	9605	3	4	4	4.55
OT 3	748	1	4	1	4.25
OT 3	748	1	4	2	3.11
OT 3	748	1	4	3	3.7
OT 3	748	1	4	4	4.86
OT 3	748	2	4	1	4.59
OT 3	748	2	4	2	3.31
OT 3	748	2	4	3	4
OT 3	748	2	4	4	5.37
OT 3	748	3	4	1	3.01
OT 3	748	3	4	2	3.85
OT 3	748	3	4	3	5.05
OT 3	748	3	4	4	5.27
OT 3	9401	1	4	1	8.06
OT 3	9401	1	4	2	7.05
OT 3	9401	1	4	3	8.42
OT 3	9401	1	4	4	5.51
OT 3	9401	2	4	1	8
OT 3	9401	2	4	2	7.16
OT 3	9401	2	4	3	2.64
OT 3	9401	2	4	4	10.02
OT 3	9401	3	4	1	8.97
OT 3	9401	3	4	2	8.54
OT 3	9401	3	4	3	10.11
OT 3	9401	3	4	4	8.44
OT 3	9174	1	4	1	6.45
OT 3	9174	1	4	2	6.1
OT 3	9174	1	4	3	5.32
OT 3	9174	1	4	4	5.9
OT 3	9174	2	4	1	5.84
OT 3	9174	2	4	2	6.54
OT 3	9174	2	4	3	7.24
OT 3	9174	2	4	4	6.21
OT 3	9174	3	4	1	6.25
OT 3	9174	3	4	2	7
OT 3	9174	3	4	3	8.12
OT 3	9174	3	4	4	6.55
OT 3	9732	1	4	1	2.54
OT 3	9732	1	4	2	2.23
OT 3	9732	1	4	3	2.35
OT 3	9732	1	4	4	3.08
OT 3	9732	2	4	1	1.4
OT 3	9732	2	4	2	1.34
OT 3	9732	2	4	3	1.49
OT 3	9732	2	4	4	3.02
OT 3	9732	3	4	1	1.78
OT 3	9732	3	4	2	2.1
OT 3	9732	3	4	3	1.73
OT 3	9732	3	4	4	2.32
OT 3	9714	1	4	1	5
OT 3	9714	1	4	2	0.6
OT 3	9714	1	4	3	1.1
OT 3	9714	1	4	4	3.1
OT 3	9714	2	4	1	3.4
OT 3	9714	2	4	2	1.25
OT 3	9714	2	4	3	3.7
OT 3	9714	2	4	4	5
OT 3	9714	3	4	1	6.11
OT 3	9714	3	4	2	5.12
OT 3	9714	3	4	3	1.34
OT 3	9714	3	4	4	4.28
OT 3	0006	1	4	1	8.56
OT 3	0006	1	4	2	7.27
OT 3	0006	1	4	3	8.06
OT 3	0006	1	4	4	9.07
OT 3	0006	2	4	1	8.37
OT 3	0006	2	4	2	9.27
OT 3	0006	2	4	3	9.65
OT 3	0006	2	4	4	8.54
OT 3	0006	3	4	1	9.85
OT 3	0006	3	4	2	9.27
OT 3	0006	3	4	3	10.08
OT 3	0006	3	4	4	9.63
OT 3	254-2	1	4	1	6.75
OT 3	254-2	1	4	2	3.1
OT 3	254-2	1	4	3	0
OT 3	254-2	1	4	4	7.68
OT 3	254-2	2	4	1	4.04
OT 3	254-2	2	4	2	3.48
OT 3	254-2	2	4	3	2.7
OT 3	254-2	2	4	4	6.8
OT 3	254-2	3	4	1	1.5
OT 3	254-2	3	4	2	2.65
OT 3	254-2	3	4	3	2.23
OT 3	254-2	3	4	4	5.07
OT 3	254-8	1	4	1	5.02
OT 3	254-8	1	4	2	5.14
OT 3	254-8	1	4	3	3.62
OT 3	254-8	1	4	4	4.03
OT 3	254-8	2	4	1	4.59
OT 3	254-8	2	4	2	5.32
OT 3	254-8	2	4	3	4.68
[truncated: 594 more rows]

## Sheet: MJ20
section	be	leaf	dpi	spot	ls
A 1	9610	1	4	1	9.42
A 1	9610	1	4	2	9.49
A 1	9610	1	4	3	9.58
A 1	9610	1	4	4	9.71
A 1	9610	2	4	1	10.32
A 1	9610	2	4	2	10.16
A 1	9610	2	4	3	10.93
A 1	9610	2	4	4	10.57
A 1	9610	3	4	1	9.52
A 1	9610	3	4	2	13.67
A 1	9610	3	4	3	9.05
A 1	9610	3	4	4	10.37
A 1	9612	1	4	1	2.32
A 1	9612	1	4	2	2.41
A 1	9612	1	4	3	6.37
A 1	9612	1	4	4	8.89
A 1	9612	2	4	1	10.34
A 1	9612	2	4	2	6.06
A 1	9612	2	4	3	0
A 1	9612	2	4	4	8.14
A 1	9612	3	4	1	2.34
A 1	9612	3	4	2	4.26
A 1	9612	3	4	3	2.7
A 1	9612	3	4	4	3
A 1	9605	1	4	1	11.72
A 1	9605	1	4	2	12.54
A 1	9605	1	4	3	10.53
A 1	9605	1	4	4	11.67
A 1	9605	2	4	1	14.86
A 1	9605	2	4	2	13.74
A 1	9605	2	4	3	14.33
A 1	9605	2	4	4	14.14
A 1	9605	3	4	1	17.32
A 1	9605	3	4	2	17.16
A 1	9605	3	4	3	15.35
A 1	9605	3	4	4	15.83
A 1	748	1	4	1	6.82
A 1	748	1	4	2	7.5
A 1	748	1	4	3	8.92
A 1	748	1	4	4	9.36
A 1	748	2	4	1	8.47
A 1	748	2	4	2	7.92
A 1	748	2	4	3	8.05
A 1	748	2	4	4	8.58
A 1	748	3	4	1	9.37
A 1	748	3	4	2	9.11
A 1	748	3	4	3	8.98
A 1	748	3	4	4	8.26
A 1	9401	1	4	1	22.9
A 1	9401	1	4	2	21
A 1	9401	1	4	3	21.9
A 1	9401	1	4	4	23.3
A 1	9401	2	4	1	24.6
A 1	9401	2	4	2	22.17
A 1	9401	2	4	3	21.4
A 1	9401	2	4	4	19.4
A 1	9401	3	4	1	22
A 1	9401	3	4	2	23.6
A 1	9401	3	4	3	24.6
A 1	9401	3	4	4	21.8
A 1	9174	1	4	1	12.36
A 1	9174	1	4	2	12.47
A 1	9174	1	4	3	11.5
A 1	9174	1	4	4	11.78
A 1	9174	2	4	1	11.06
A 1	9174	2	4	2	11.58
A 1	9174	2	4	3	11.83
A 1	9174	2	4	4	12.16
A 1	9174	3	4	1	13.17
A 1	9174	3	4	2	13.25
A 1	9174	3	4	3	12.55
A 1	9174	3	4	4	12.26
A 1	9732	1	4	1	2.73
A 1	9732	1	4	2	3.11
A 1	9732	1	4	3	3.22
A 1	9732	1	4	4	2.94
A 1	9732	2	4	1	3.04
A 1	9732	2	4	2	3.07
A 1	9732	2	4	3	3.15
A 1	9732	2	4	4	2.9
A 1	9732	3	4	1	2.53
A 1	9732	3	4	2	2.59
A 1	9732	3	4	3	3.11
A 1	9732	3	4	4	3.36
A 1	9714	1	4	1	8.64
A 1	9714	1	4	2	9.22
A 1	9714	1	4	3	8.75
A 1	9714	1	4	4	9.64
A 1	9714	2	4	1	9.83
A 1	9714	2	4	2	9.78
A 1	9714	2	4	3	10.71
A 1	9714	2	4	4	10.33
A 1	9714	3	4	1	8.79
A 1	9714	3	4	2	9.74
A 1	9714	3	4	3	9.36
A 1	9714	3	4	4	9.72
A 1	0006	1	4	1	18.64
A 1	0006	1	4	2	24.31
A 1	0006	1	4	3	21.16
A 1	0006	1	4	4	23.23
A 1	0006	2	4	1	22.03
A 1	0006	2	4	2	20.59
A 1	0006	2	4	3	23.95
A 1	0006	2	4	4	22.46
A 1	0006	3	4	1	21.36
A 1	0006	3	4	2	22.34
A 1	0006	3	4	3	22.87
A1	0006	3	4	4	23.24
A 1	254-2	1	4	1	16.94
A 1	254-2	1	4	2	15.92
A 1	254-2	1	4	3	15.73
A 1	254-2	1	4	4	15.44
A 1	254-2	2	4	1	16
A 1	254-2	2	4	2	15.07
A 1	254-2	2	4	3	14.06
A 1	254-2	2	4	4	13.35
A 1	254-2	3	4	1	15.97
A 1	254-2	3	4	2	19.65
A 1	254-2	3	4	3	18.26
A 1	254-2	3	4	4	17.16
A 1	254-8	1	4	1	16.94
A 1	254-8	1	4	2	15.93
A 1	254-8	1	4	3	16.54
A 1	254-8	1	4	4	14.48
A 1	254-8	2	4	1	17.73
A 1	254-8	2	4	2	16.52
A 1	254-8	2	4	3	15.04
A 1	254-8	2	4	4	16.09
A 1	254-8	3	4	1	17.58
A 1	254-8	3	4	2	14.61
A 1	254-8	3	4	3	16.56
A 1	254-8	3	4	4	14.23
A 1	254-11	1	4	1	17.96
A 1	254-11	1	4	2	19.32
A 1	254-11	1	4	3	18.77
A 1	254-11	1	4	4	17.45
A 1	254-11	2	4	1	17.98
A 1	254-11	2	4	2	15.85
A 1	254-11	2	4	3	16.83
A 1	254-11	2	4	4	15.81
A 1	254-11	3	4	1	19.97
A 1	254-11	3	4	2	14.53
A 1	254-11	3	4	3	15.84
A 1	254-11	3	4	4	16.93
A 2	9610	1	4	1	14.21
A 2	9610	1	4	2	12.64
A 2	9610	1	4	3	11.1
A 2	9610	1	4	4	9.75
A 2	9610	2	4	1	13.66
A 2	9610	2	4	2	13.75
A 2	9610	2	4	3	12.76
A 2	9610	2	4	4	15.26
A 2	9610	3	4	1	11.74
A 2	9610	3	4	2	12.45
A 2	9610	3	4	3	14.46
A 2	9610	3	4	4	11.44
A 2	9612	1	4	1	3.02
A 2	9612	1	4	2	3.23
A 2	9612	1	4	3	2.94
A 2	9612	1	4	4	3.44
A 2	9612	2	4	1	3.64
A 2	9612	2	4	2	2.92
A 2	9612	2	4	3	2.96
A 2	9612	2	4	4	3.1
A 2	9612	3	4	1	3.25
A 2	9612	3	4	2	2.52
A 2	9612	3	4	3	3.27
A 2	9612	3	4	4	2.88
A 2	9605	1	4	1	2.69
A 2	9605	1	4	2	6.74
A 2	9605	1	4	3	10.45
A 2	9605	1	4	4	4.92
A 2	9605	2	4	1	1.9
A 2	9605	2	4	2	5.45
A 2	9605	2	4	3	5.48
A 2	9605	2	4	4	6.41
A 2	9605	3	4	1	3.38
A 2	9605	3	4	2	6.89
A 2	9605	3	4	3	6.1
A 2	9605	3	4	4	8.42
A 2	748	1	4	1	3.33
A 2	748	1	4	2	3.42
A 2	748	1	4	3	3.71
A 2	748	1	4	4	4.2
A 2	748	2	4	1	5.78
A 2	748	2	4	2	5.05
A 2	748	2	4	3	4.04
A 2	748	2	4	4	5.36
A 2	748	3	4	1	6.29
A 2	748	3	4	2	7.69
A 2	748	3	4	3	4.23
A 2	748	3	4	4	2.4
A 2	9401	1	4	1	20.7
A 2	9401	1	4	2	20.6
A 2	9401	1	4	3	19.9
A 2	9401	1	4	4	21.9
A 2	9401	2	4	1	23.22
A 2	9401	2	4	2	23.4
A 2	9401	2	4	3	21.1
A 2	9401	2	4	4	22.3
A 2	9401	3	4	1	22.4
A 2	9401	3	4	2	19
A 2	9401	3	4	3	19.3
A 2	9401	3	4	4	21.24
A 2	9174	1	4	1	16.15
A 2	9174	1	4	2	18.88
A 2	9174	1	4	3	18.34
A 2	9174	1	4	4	18.29
A 2	9174	2	4	1	17.5
A 2	9174	2	4	2	15.09
A 2	9174	2	4	3	18.11
A 2	9174	2	4	4	18.72
A 2	9174	3	4	1	20.11
A 2	9174	3	4	2	17.91
A 2	9174	3	4	3	17.76
A 2	9174	3	4	4	15.38
A 2	9732	1	4	1	0
A 2	9732	1	4	2	0
A 2	9732	1	4	3	3.31
A 2	9732	1	4	4	2.44
A 2	9732	2	4	1	1.8
A 2	9732	2	4	2	2.1
A 2	9732	2	4	3	0
A 2	9732	2	4	4	2.55
A 2	9732	3	4	1	2.6
A 2	9732	3	4	2	0
A 2	9732	3	4	3	3
A 2	9732	3	4	4	3.16
A 2	9714	1	4	1	6.33
A 2	9714	1	4	2	5.94
A 2	9714	1	4	3	7.28
A 2	9714	1	4	4	6.66
A 2	9714	2	4	1	8.39
A 2	9714	2	4	2	8.57
A 2	9714	2	4	3	6.56
A 2	9714	2	4	4	10.98
A 2	9714	3	4	1	10.78
A 2	9714	3	4	2	9.74
A 2	9714	3	4	3	9.38
A 2	9714	3	4	4	9.1
A 2	0006	1	4	1	16.53
A 2	0006	1	4	2	16.02
A 2	0006	1	4	3	16.78
A 2	0006	1	4	4	18.18
A 2	0006	2	4	1	17.88
A 2	0006	2	4	2	12.09
A 2	0006	2	4	3	15.36
A 2	0006	2	4	4	16.69
A 2	0006	3	4	1	17.84
A 2	0006	3	4	2	16.33
A 2	0006	3	4	3	16.58
A 2	0006	3	4	4	15.92
A 2	254-2	1	4	1	11.33
A 2	254-2	1	4	2	12.98
A 2	254-2	1	4	3	13.25
A 2	254-2	1	4	4	8.57
A 2	254-2	2	4	1	11.29
A 2	254-2	2	4	2	8.54
A 2	254-2	2	4	3	12.18
A 2	254-2	2	4	4	10.97
A 2	254-2	3	4	1	11.69
A 2	254-2	3	4	2	12.87
A 2	254-2	3	4	3	12.76
A 2	254-2	3	4	4	10.1
A 2	254-8	1	4	1	18.65
A 2	254-8	1	4	2	18.74
A 2	254-8	1	4	3	17.36
A 2	254-8	1	4	4	18.48
A 2	254-8	2	4	1	16.85
A 2	254-8	2	4	2	16.39
A 2	254-8	2	4	3	17.12
A 2	254-8	2	4	4	16.08
A 2	254-8	3	4	1	14.25
A 2	254-8	3	4	2	15.39
A 2	254-8	3	4	3	15.64
A 2	254-8	3	4	4	14.93
A 2	254-11	1	4	1	15.9
A 2	254-11	1	4	2	17.12
A 2	254-11	1	4	3	16.25
A 2	254-11	1	4	4	18.98
A 2	254-11	2	4	1	20.9
A 2	254-11	2	4	2	19.94
A 2	254-11	2	4	3	18.86
A 2	254-11	2	4	4	21.17
A 2	254-11	3	4	1	19.98
A 2	254-11	3	4	2	22.07
A 2	254-11	3	4	3	20.84
A 2	254-11	3	4	4	21.18
A 3	9610	1	4	1	11.35
A 3	9610	1	4	2	9.24
A 3	9610	1	4	3	11.62
A 3	9610	1	4	4	10.95
A 3	9610	2	4	1	10.69
A 3	9610	2	4	2	12
A 3	9610	2	4	3	11.23
A 3	9610	2	4	4	11.04
A 3	9610	3	4	1	11.74
A 3	9610	3	4	2	7.4
A 3	9610	3	4	3	9.92
A 3	9610	3	4	4	8.68
A 3	9612	1	4	1	6.63
A 3	9612	1	4	2	4.79
A 3	9612	1	4	3	7.12
A 3	9612	1	4	4	4.9
A 3	9612	2	4	1	6.65
A 3	9612	2	4	2	6.7
A 3	9612	2	4	3	5.27
A 3	9612	2	4	4	4.6
A 3	9612	3	4	1	5.38
A 3	9612	3	4	2	6.57
A 3	9612	3	4	3	5.34
A 3	9612	3	4	4	3.78
A 3	9605	1	4	1	8.18
A 3	9605	1	4	2	3.05
A 3	9605	1	4	3	9.94
A 3	9605	1	4	4	10.2
A 3	9605	2	4	1	8.51
A 3	9605	2	4	2	6.23
A 3	9605	2	4	3	6.31
A 3	9605	2	4	4	7.84
A 3	9605	3	4	1	9.59
A 3	9605	3	4	2	8.68
A 3	9605	3	4	3	9.55
A 3	9605	3	4	4	8.28
A 3	748	1	4	1	6.09
A 3	748	1	4	2	5.12
A 3	748	1	4	3	6.43
A 3	748	1	4	4	6.07
A 3	748	2	4	1	6.95
A 3	748	2	4	2	7.86
A 3	748	2	4	3	7.48
A 3	748	2	4	4	6.56
A 3	748	3	4	1	6.85
A 3	748	3	4	2	6.6
A 3	748	3	4	3	7.16
A 3	748	3	4	4	7.58
A 3	9401	1	4	1	16.5
A 3	9401	1	4	2	17.3
A 3	9401	1	4	3	18.4
A 3	9401	1	4	4	17.9
A 3	9401	2	4	1	13.5
A 3	9401	2	4	2	12.98
A 3	9401	2	4	3	14.1
A 3	9401	2	4	4	14
A 3	9401	3	4	1	14.5
A 3	9401	3	4	2	12.3
A 3	9401	3	4	3	18.3
A 3	9401	3	4	4	21.9
A 3	9174	1	4	1	12.6
A 3	9174	1	4	2	11.7
A 3	9174	1	4	3	13.5
A 3	9174	1	4	4	12.3
A 3	9174	2	4	1	11.6
A 3	9174	2	4	2	11.35
A 3	9174	2	4	3	13.49
A 3	9174	2	4	4	12.31
A 3	9174	3	4	1	10.39
A 3	9174	3	4	2	11.02
A 3	9174	3	4	3	12.1
A 3	9174	3	4	4	10.28
A 3	9732	1	4	1	2.69
A 3	9732	1	4	2	2.25
A 3	9732	1	4	3	2.78
A 3	9732	1	4	4	2.33
A 3	9732	2	4	1	2.66
A 3	9732	2	4	2	2.42
A 3	9732	2	4	3	2.65
A 3	9732	2	4	4	2.78
A 3	9732	3	4	1	2.62
A 3	9732	3	4	2	2.91
A 3	9732	3	4	3	2.61
A 3	9732	3	4	4	3.12
A 3	9714	1	4	1	6.33
A 3	9714	1	4	2	5.91
A 3	9714	1	4	3	7.28
A 3	9714	1	4	4	6.61
A 3	9714	2	4	1	8.39
A 3	9714	2	4	2	8.54
A 3	9714	2	4	3	6.57
A 3	9714	2	4	4	10.93
A 3	9714	3	4	1	10.78
A 3	9714	3	4	2	9.71
A 3	9714	3	4	3	9.34
A 3	9714	3	4	4	10.2
A 3	0006	1	4	1	22.87
A 3	0006	1	4	2	24.25
A 3	0006	1	4	3	22.65
A 3	0006	1	4	4	24.15
A 3	0006	2	4	1	20.82
A 3	0006	2	4	2	21.9
A 3	0006	2	4	3	19.37
A 3	0006	2	4	4	20.07
A 3	0006	3	4	1	21.62
A 3	0006	3	4	2	20.95
A 3	0006	3	4	3	24.3
A 3	0006	3	4	4	23.91
A 3	254-2	1	4	1	9.84
A 3	254-2	1	4	2	6.74
A 3	254-2	1	4	3	9.15
A 3	254-2	1	4	4	9.26
A 3	254-2	2	4	1	8.47
A 3	254-2	2	4	2	10.02
A 3	254-2	2	4	3	9.33
A 3	254-2	2	4	4	10.21
A 3	254-2	3	4	1	9.95
A 3	254-2	3	4	2	10.37
A 3	254-2	3	4	3	8.07
A 3	254-2	3	4	4	7.76
A 3	254-8	1	4	1	14.2
A 3	254-8	1	4	2	13.2
A 3	254-8	1	4	3	13.9
A 3	254-8	1	4	4	14.8
A 3	254-8	2	4	1	13.8
A 3	254-8	2	4	2	14.1
A 3	254-8	2	4	3	13.9
A 3	254-8	2	4	4	14.3
A 3	254-8	3	4	1	13.9
A 3	254-8	3	4	2	14.6
A 3	254-8	3	4	3	14.12
A 3	254-8	3	4	4	13.13
A 3	254-11	1	4	1	21.05
A 3	254-11	1	4	2	19.15
A 3	254-11	1	4	3	18.05
A 3	254-11	1	4	4	15.97
A 3	254-11	2	4	1	18.4
A 3	254-11	2	4	2	17.47
A 3	254-11	2	4	3	14.81
A 3	254-11	2	4	4	15.38
A 3	254-11	3	4	1	19.12
A 3	254-11	3	4	2	18.12
A 3	254-11	3	4	3	18.7
A 3	254-11	3	4	4	17.6
LA 3	9610	1	4	1	9.11
LA 3	9610	1	4	2	10.17
LA 3	9610	1	4	3	10.13
LA 3	9610	1	4	4	9.9
LA 3	9610	2	4	1	9.61
LA 3	9610	2	4	2	10.42
LA 3	9610	2	4	3	9.63
LA 3	9610	2	4	4	9.84
LA 3	9610	3	4	1	9.34
LA 3	9610	3	4	2	9.47
LA 3	9610	3	4	3	10.61
LA 3	9610	3	4	4	10.2
LA 3	9612	1	4	1	5.77
LA 3	9612	1	4	2	6.21
LA 3	9612	1	4	3	6.46
LA 3	9612	1	4	4	6.26
LA 3	9612	2	4	1	4.81
LA 3	9612	2	4	2	3.77
LA 3	9612	2	4	3	4.14
LA 3	9612	2	4	4	4.21
LA 3	9612	3	4	1	4
LA 3	9612	3	4	2	4.55
LA 3	9612	3	4	3	5.95
LA 3	9612	3	4	4	4.87
LA 3	9605	1	4	1	5.91
LA 3	9605	1	4	2	6.9
LA 3	9605	1	4	3	7.87
LA 3	9605	1	4	4	4.09
LA 3	9605	2	4	1	4.83
LA 3	9605	2	4	2	5.03
LA 3	9605	2	4	3	6.05
LA 3	9605	2	4	4	5.85
LA 3	9605	3	4	1	6.33
LA 3	9605	3	4	2	7.16
LA 3	9605	3	4	3	7.64
LA 3	9605	3	4	4	5.16
LA 3	748	1	4	1	6.08
LA 3	748	1	4	2	5.24
LA 3	748	1	4	3	4.97
LA 3	748	1	4	4	5.29
LA 3	748	2	4	1	6
LA 3	748	2	4	2	5
LA 3	748	2	4	3	4.25
LA 3	748	2	4	4	5.35
LA 3	748	3	4	1	4.8
LA 3	748	3	4	2	5.43
LA 3	748	3	4	3	5.48
LA 3	748	3	4	4	5.39
LA 3	9401	1	4	1	17.08
LA 3	9401	1	4	2	14.84
LA 3	9401	1	4	3	16.4
LA 3	9401	1	4	4	15.26
LA 3	9401	2	4	1	12.54
LA 3	9401	2	4	2	13.02
LA 3	9401	2	4	3	13.8
LA 3	9401	2	4	4	13.57
LA 3	9401	3	4	1	16.74
LA 3	9401	3	4	2	15.85
LA 3	9401	3	4	3	18.27
LA 3	9401	3	4	4	16.81
LA 3	9174	1	4	1	7.88
LA 3	9174	1	4	2	7.74
LA 3	9174	1	4	3	7.73
LA 3	9174	1	4	4	7.61
LA 3	9174	2	4	1	7.29
LA 3	9174	2	4	2	7.41
LA 3	9174	2	4	3	7.1
LA 3	9174	2	4	4	8.85
LA 3	9174	3	4	1	7.89
LA 3	9174	3	4	2	7.76
LA 3	9174	3	4	3	7.39
LA 3	9174	3	4	4	8.09
LA 3	9732	1	4	1	3.04
LA 3	9732	1	4	2	3.28
LA 3	9732	1	4	3	3.35
LA 3	9732	1	4	4	3.66
LA 3	9732	2	4	1	2.31
LA 3	9732	2	4	2	2.61
LA 3	9732	2	4	3	2.97
LA 3	9732	2	4	4	2.66
LA 3	9732	3	4	1	2.48
LA 3	9732	3	4	2	2.58
LA 3	9732	3	4	3	3.26
LA 3	9732	3	4	4	2.66
LA 3	9714	1	4	1	8.5
LA 3	9714	1	4	2	7.85
LA 3	9714	1	4	3	8.47
LA 3	9714	1	4	4	9.25
LA 3	9714	2	4	1	8.11
LA 3	9714	2	4	2	7.04
LA 3	9714	2	4	3	7.45
LA 3	9714	2	4	4	7.93
LA 3	9714	3	4	1	6.58
LA 3	9714	3	4	2	7.58
LA 3	9714	3	4	3	7.64
LA 3	9714	3	4	4	7.81
LA 3	0006	1	4	1	14.21
LA 3	0006	1	4	2	13.6
LA 3	0006	1	4	3	14
LA 3	0006	1	4	4	13.24
LA 3	0006	2	4	1	13.67
LA 3	0006	2	4	2	14.21
LA 3	0006	2	4	3	13.24
LA 3	0006	2	4	4	12.56
LA 3	0006	3	4	1	13.17
LA 3	0006	3	4	2	11.95
LA 3	0006	3	4	3	13.92
LA 3	0006	3	4	4	13.67
LA 3	254-2	1	4	1	8.08
LA 3	254-2	1	4	2	8.82
LA 3	254-2	1	4	3	9.9
LA 3	254-2	1	4	4	9.1
LA 3	254-2	2	4	1	9.42
LA 3	254-2	2	4	2	10.08
LA 3	254-2	2	4	3	10.72
LA 3	254-2	2	4	4	9.18
LA 3	254-2	3	4	1	9.52
LA 3	254-2	3	4	2	8.66
LA 3	254-2	3	4	3	8.84
LA 3	254-2	3	4	4	9.67
LA 3	254-8	1	4	1	9.33
LA 3	254-8	1	4	2	8.45
LA 3	254-8	1	4	3	8.74
LA 3	254-8	1	4	4	8.85
LA 3	254-8	2	4	1	9.28
LA 3	254-8	2	4	2	9.08
LA 3	254-8	2	4	3	8.36
LA 3	254-8	2	4	4	7.74
LA 3	254-8	3	4	1	8.36
LA 3	254-8	3	4	2	9.68
LA 3	254-8	3	4	3	9.44
LA 3	254-8	3	4	4	9.28
LA 3	254-11	1	4	1	9.69
LA 3	254-11	1	4	2	10.91
LA 3	254-11	1	4	3	9.54
LA 3	254-11	1	4	4	8.67
LA 3	254-11	2	4	1	9.08
LA 3	254-11	2	4	2	10.88
LA 3	254-11	2	4	3	11.16
LA 3	254-11	2	4	4	8.74
LA 3	254-11	3	4	1	7.74
LA 3	254-11	3	4	2	6.36
LA 3	254-11	3	4	3	5.34
LA 3	254-11	3	4	4	6.59
LA 1	9610	1	4	1	8.1
LA 1	9610	1	4	2	10.45
LA 1	9610	1	4	3	9.56
LA 1	9610	1	4	4	9.88
LA 1	9610	2	4	1	9.15
LA 1	9610	2	4	2	9.8
LA 1	9610	2	4	3	10.55
LA 1	9610	2	4	4	9.6
LA 1	9610	3	4	1	10.37
LA 1	9610	3	4	2	9.48
LA 1	9610	3	4	3	9.97
LA 1	9610	3	4	4	8.8
LA 1	9612	1	4	1	7.04
LA 1	9612	1	4	2	8.08
LA 1	9612	1	4	3	8.8
LA 1	9612	1	4	4	7.75
LA 1	9612	2	4	1	8.36
LA 1	9612	2	4	2	9.05
LA 1	9612	2	4	3	8.65
LA 1	9612	2	4	4	8.29
LA 1	9612	3	4	1	7.93
LA 1	9612	3	4	2	8.88
LA 1	9612	3	4	3	8.93
LA 1	9612	3	4	4	7.6
LA 1	9605	1	4	1	8.32
LA 1	9605	1	4	2	9.33
LA 1	9605	1	4	3	8.68
LA 1	9605	1	4	4	10.5
LA 1	9605	2	4	1	5.4
LA 1	9605	2	4	2	8.7
LA 1	9605	2	4	3	11.78
LA 1	9605	2	4	4	9.23
LA 1	9605	3	4	1	11.12
LA 1	9605	3	4	2	10.07
LA 1	9605	3	4	3	11.7
LA 1	9605	3	4	4	11.87
LA 1	748	1	4	1	3.05
LA 1	748	1	4	2	2.98
LA 1	748	1	4	3	2.93
LA 1	748	1	4	4	3.35
LA 1	748	2	4	1	2.75
LA 1	748	2	4	2	2.77
LA 1	748	2	4	3	3.12
LA 1	748	2	4	4	3.76
LA 1	748	3	4	1	3.36
LA 1	748	3	4	2	3.97
LA 1	748	3	4	3	3.94
LA 1	748	3	4	4	3.56
LA 1	9401	1	4	1	13.4
LA 1	9401	1	4	2	16.52
LA 1	9401	1	4	3	19.35
LA 1	9401	1	4	4	15.34
LA 1	9401	2	4	1	15
LA 1	9401	2	4	2	18.9
LA 1	9401	2	4	3	11.9
LA 1	9401	2	4	4	12.4
LA 1	9401	3	4	1	16.72
LA 1	9401	3	4	2	13.91
LA 1	9401	3	4	3	13.84
LA 1	9401	3	4	4	14.72
LA 1	9174	1	4	1	12.52
LA 1	9174	1	4	2	12.36
LA 1	9174	1	4	3	13.24
LA 1	9174	1	4	4	12.69
LA 1	9174	2	4	1	11.21
LA 1	9174	2	4	2	11.2
LA 1	9174	2	4	3	10.59
LA 1	9174	2	4	4	13.19
LA 1	9174	3	4	1	13.42
LA 1	9174	3	4	2	13.15
LA 1	9174	3	4	3	12.58
LA 1	9174	3	4	4	11.41
LA 1	9732	1	4	1	4.75
LA 1	9732	1	4	2	4.31
LA 1	9732	1	4	3	3.9
LA 1	9732	1	4	4	6.08
LA 1	9732	2	4	1	5.29
LA 1	9732	2	4	2	5.91
LA 1	9732	2	4	3	4.55
LA 1	9732	2	4	4	5.46
LA 1	9732	3	4	1	5.78
LA 1	9732	3	4	2	5.25
LA 1	9732	3	4	3	4.31
LA 1	9732	3	4	4	5.12
LA 1	9714	1	4	1	9.7
LA 1	9714	1	4	2	8.7
LA 1	9714	1	4	3	10.32
LA 1	9714	1	4	4	9.34
LA 1	9714	2	4	1	8.98
LA 1	9714	2	4	2	8.24
LA 1	9714	2	4	3	9.43
LA 1	9714	2	4	4	8.81
LA 1	9714	3	4	1	7.61
LA 1	9714	3	4	2	8.12
LA 1	9714	3	4	3	8.37
LA 1	9714	3	4	4	8.11
LA 1	0006	1	4	1	13.75
LA 1	0006	1	4	2	14.13
LA 1	0006	1	4	3	14.92
LA 1	0006	1	4	4	13.54
LA 1	0006	2	4	1	14.15
LA 1	0006	2	4	2	13.31
LA 1	0006	2	4	3	12.57
LA 1	0006	2	4	4	13.2
LA 1	0006	3	4	1	13.07
LA 1	0006	3	4	2	13.84
LA 1	0006	3	4	3	14.1
LA 1	0006	3	4	4	12.37
LA 1	254-2	1	4	1	10.6
LA 1	254-2	1	4	2	11.29
LA 1	254-2	1	4	3	11.25
LA 1	254-2	1	4	4	12.35
LA 1	254-2	2	4	1	13.79
LA 1	254-2	2	4	2	15.07
LA 1	254-2	2	4	3	15.47
LA 1	254-2	2	4	4	16.34
LA 1	254-2	3	4	1	12.9
LA 1	254-2	3	4	2	12.25
LA 1	254-2	3	4	3	10.02
LA 1	254-2	3	4	4	13.54
LA 1	254-8	1	4	1	13.22
LA 1	254-8	1	4	2	14.04
LA 1	254-8	1	4	3	13.5
LA 1	254-8	1	4	4	12.8
LA 1	254-8	2	4	1	11.44
LA 1	254-8	2	4	2	12.15
LA 1	254-8	2	4	3	12.42
LA 1	254-8	2	4	4	12.39
LA 1	254-8	3	4	1	13.69
LA 1	254-8	3	4	2	14.5
LA 1	254-8	3	4	3	15.37
LA 1	254-8	3	4	4	13.71
LA 1	254-11	1	4	1	16.4
LA 1	254-11	1	4	2	16.7
LA 1	254-11	1	4	3	16.8
LA 1	254-11	1	4	4	15.3
LA 1	254-11	2	4	1	15.67
LA 1	254-11	2	4	2	14.25
LA 1	254-11	2	4	3	14.73
LA 1	254-11	2	4	4	18.31
LA 1	254-11	3	4	1	16.24
LA 1	254-11	3	4	2	12.84
LA 1	254-11	3	4	3	12.36
LA 1	254-11	3	4	4	15.74
LA 2	9610	1	4	1	9.62
LA 2	9610	1	4	2	9.66
LA 2	9610	1	4	3	10.29
LA 2	9610	1	4	4	10.95
LA 2	9610	2	4	1	9.16
LA 2	9610	2	4	2	9.75
LA 2	9610	2	4	3	9.36
LA 2	9610	2	4	4	7.38
LA 2	9610	3	4	1	7.74
LA 2	9610	3	4	2	7.82
LA 2	9610	3	4	3	8.84
LA 2	9610	3	4	4	7.5
LA 2	9612	1	4	1	6.46
LA 2	9612	1	4	2	6.1
LA 2	9612	1	4	3	7.18
LA 2	9612	1	4	4	6.27
LA 2	9612	2	4	1	6.93
LA 2	9612	2	4	2	6.25
LA 2	9612	2	4	3	6.47
LA 2	9612	2	4	4	6.91
LA 2	9612	3	4	1	4.75
LA 2	9612	3	4	2	6.14
LA 2	9612	3	4	3	5.83
LA 2	9612	3	4	4	7.62
LA 2	9605	1	4	1	9.65
LA 2	9605	1	4	2	9.77
LA 2	9605	1	4	3	10.58
LA 2	9605	1	4	4	10.3
LA 2	9605	2	4	1	9.28
LA 2	9605	2	4	2	7.75
LA 2	9605	2	4	3	9.24
LA 2	9605	2	4	4	6.84
LA 2	9605	3	4	1	5.32
LA 2	9605	3	4	2	9.7
LA 2	9605	3	4	3	8.24
LA 2	9605	3	4	4	3.36
LA 2	748	1	4	1	14.15
LA 2	748	1	4	2	12.18
LA 2	748	1	4	3	13.18
LA 2	748	1	4	4	14.58
LA 2	748	2	4	1	16.68
LA 2	748	2	4	2	14.12
LA 2	748	2	4	3	14.7
LA 2	748	2	4	4	18
LA 2	748	3	4	1	14
LA 2	748	3	4	2	13.7
LA 2	748	3	4	3	13.25
LA 2	748	3	4	4	14.08
LA 2	9401	1	4	1	16.3
LA 2	9401	1	4	2	15.98
LA 2	9401	1	4	3	16.93
LA 2	9401	1	4	4	15.54
LA 2	9401	2	4	1	16.62
LA 2	9401	2	4	2	17.34
LA 2	9401	2	4	3	18.62
LA 2	9401	2	4	4	16.87
LA 2	9401	3	4	1	15.1
LA 2	9401	3	4	2	17.6
LA 2	9401	3	4	3	16.4
LA 2	9401	3	4	4	16
LA 2	9174	1	4	1	14.36
LA 2	9174	1	4	2	12.89
LA 2	9174	1	4	3	13.86
LA 2	9174	1	4	4	14.71
LA 2	9174	2	4	1	14.63
LA 2	9174	2	4	2	13.87
LA 2	9174	2	4	3	14.9
LA 2	9174	2	4	4	14.56
LA 2	9174	3	4	1	13.12
LA 2	9174	3	4	2	12.63
LA 2	9174	3	4	3	13.47
LA 2	9174	3	4	4	12.82
LA 2	9732	1	4	1	5.09
LA 2	9732	1	4	2	4.91
LA 2	9732	1	4	3	4.93
LA 2	9732	1	4	4	5.03
LA 2	9732	2	4	1	3.97
LA 2	9732	2	4	2	4.25
LA 2	9732	2	4	3	4.09
LA 2	9732	2	4	4	2.52
LA 2	9732	3	4	1	5.55
LA 2	9732	3	4	2	5.86
LA 2	9732	3	4	3	5.13
LA 2	9732	3	4	4	5.77
LA 2	9714	1	4	1	10.02
LA 2	9714	1	4	2	9.82
LA 2	9714	1	4	3	11.05
LA 2	9714	1	4	4	10.68
LA 2	9714	2	4	1	9.54
LA 2	9714	2	4	2	11.31
LA 2	9714	2	4	3	11.04
LA 2	9714	2	4	4	8.63
LA 2	9714	3	4	1	9.23
LA 2	9714	3	4	2	9.51
LA 2	9714	3	4	3	9.85
LA 2	9714	3	4	4	9.32
LA 2	0006	1	4	1	16.02
LA 2	0006	1	4	2	14.5
LA 2	0006	1	4	3	15.02
LA 2	0006	1	4	4	15.21
LA 2	0006	2	4	1	15.31
LA 2	0006	2	4	2	14.84
LA 2	0006	2	4	3	14.6
LA 2	0006	2	4	4	15.77
LA 2	0006	3	4	1	15.94
LA 2	0006	3	4	2	15.17
LA 2	0006	3	4	3	16.31
LA 2	0006	3	4	4	15.59
LA 2	254-2	1	4	1	11.84
LA 2	254-2	1	4	2	9.8
LA 2	254-2	1	4	3	10.52
LA 2	254-2	1	4	4	10.36
LA 2	254-2	2	4	1	11.14
LA 2	254-2	2	4	2	11.46
LA 2	254-2	2	4	3	12.23
LA 2	254-2	2	4	4	11.97
LA 2	254-2	3	4	1	10.7
LA 2	254-2	3	4	2	12.25
LA 2	254-2	3	4	3	11.53
LA 2	254-2	3	4	4	11.82
LA 2	254-8	1	4	1	15.94
LA 2	254-8	1	4	2	15.33
LA 2	254-8	1	4	3	14.27
LA 2	254-8	1	4	4	13.71
LA 2	254-8	2	4	1	14.73
LA 2	254-8	2	4	2	13.71
LA 2	254-8	2	4	3	13.12
LA 2	254-8	2	4	4	13.64
LA 2	254-8	3	4	1	14.19
LA 2	254-8	3	4	2	14.34
LA 2	254-8	3	4	3	13.26
LA 2	254-8	3	4	4	11.45
LA 2	254-11	1	4	1	10.07
LA 2	254-11	1	4	2	9.3
LA 2	254-11	1	4	3	10.36
LA 2	254-11	1	4	4	9.6
LA 2	254-11	2	4	1	10.82
LA 2	254-11	2	4	2	10.24
LA 2	254-11	2	4	3	9.6
LA 2	254-11	2	4	4	10.75
LA 2	254-11	3	4	1	10.63
LA 2	254-11	3	4	2	11.27
LA 2	254-11	3	4	3	9.65
LA 2	254-11	3	4	4	10.38
L 1	9610	1	4	1	8.34
L 1	9610	1	4	2	7.48
L 1	9610	1	4	3	6.67
L 1	9610	1	4	4	6.71
L 1	9610	2	4	1	6.93
L 1	9610	2	4	2	6.78
L 1	9610	2	4	3	5.57
L 1	9610	2	4	4	6.82
L 1	9610	3	4	1	6.44
L 1	9610	3	4	2	7.49
L 1	9610	3	4	3	6.09
L 1	9610	3	4	4	6.95
L 1	9612	1	4	1	4.72
L 1	9612	1	4	2	4.6
L 1	9612	1	4	3	4.28
L 1	9612	1	4	4	5.35
L 1	9612	2	4	1	4.45
L 1	9612	2	4	2	3.48
L 1	9612	2	4	3	3.58
L 1	9612	2	4	4	3.59
L 1	9612	3	4	1	3.66
L 1	9612	3	4	2	3.15
L 1	9612	3	4	3	3.52
L 1	9612	3	4	4	3.84
L 1	9605	1	4	1	3.97
L 1	9605	1	4	2	4.44
L 1	9605	1	4	3	5.16
L 1	9605	1	4	4	2.95
L 1	9605	2	4	1	3.64
L 1	9605	2	4	2	3.68
L 1	9605	2	4	3	3.82
L 1	9605	2	4	4	4.14
L 1	9605	3	4	1	5.13
L 1	9605	3	4	2	3.36
L 1	9605	3	4	3	3.75
L 1	9605	3	4	4	1.7
L 1	748	1	4	1	5.84
L 1	748	1	4	2	4
L 1	748	1	4	3	3.85
L 1	748	1	4	4	5.16
L 1	748	2	4	1	6.28
L 1	748	2	4	2	6.38
L 1	748	2	4	3	5.24
L 1	748	2	4	4	4.96
L 1	748	3	4	1	3.69
L 1	748	3	4	2	3.89
L 1	748	3	4	3	3.94
L 1	748	3	4	4	4.28
L 1	9401	1	4	1	5.39
L 1	9401	1	4	2	4.68
L 1	9401	1	4	3	4.7
L 1	9401	1	4	4	4.76
L 1	9401	2	4	1	10.76
L 1	9401	2	4	2	8.84
L 1	9401	2	4	3	10.61
L 1	9401	2	4	4	9.75
L 1	9401	3	4	1	10.54
L 1	9401	3	4	2	8.5
L 1	9401	3	4	3	8.19
L 1	9401	3	4	4	9.22
L 1	9174	1	4	1	6.77
L 1	9174	1	4	2	7.66
L 1	9174	1	4	3	9
L 1	9174	1	4	4	8.75
L 1	9174	2	4	1	7.27
L 1	9174	2	4	2	8.13
L 1	9174	2	4	3	7.23
L 1	9174	2	4	4	7.56
L 1	9174	3	4	1	6.83
L 1	9174	3	4	2	7.17
L 1	9174	3	4	3	6.76
L 1	9174	3	4	4	7.3
L 1	9732	1	4	1	1.58
L 1	9732	1	4	2	2.17
L 1	9732	1	4	3	2.68
L 1	9732	1	4	4	2.67
L 1	9732	2	4	1	2.6
L 1	9732	2	4	2	2.11
L 1	9732	2	4	3	2.64
L 1	9732	2	4	4	2.88
L 1	9732	3	4	1	1.66
L 1	9732	3	4	2	4.25
L 1	9732	3	4	3	2.15
L 1	9732	3	4	4	2.93
L 1	9714	1	4	1	4.66
L 1	9714	1	4	2	4.15
L 1	9714	1	4	3	4.89
L 1	9714	1	4	4	4.4
L 1	9714	2	4	1	4.27
L 1	9714	2	4	2	3.81
L 1	9714	2	4	3	2.96
L 1	9714	2	4	4	3.34
L 1	9714	3	4	1	1.5
L 1	9714	3	4	2	0
L 1	9714	3	4	3	1.2
L 1	9714	3	4	4	1.94
L 1	0006	1	4	1	8.03
L 1	0006	1	4	2	7.05
L 1	0006	1	4	3	6.03
L 1	0006	1	4	4	7.19
L 1	0006	2	4	1	5.43
L 1	0006	2	4	2	4.83
L 1	0006	2	4	3	6.43
L 1	0006	2	4	4	7.24
L 1	0006	3	4	1	8.11
L 1	0006	3	4	2	8.12
L 1	0006	3	4	3	8.71
L 1	0006	3	4	4	7.03
L 1	254-2	1	4	1	2.36
L 1	254-2	1	4	2	4.39
L 1	254-2	1	4	3	3.43
L 1	254-2	1	4	4	3.61
L 1	254-2	2	4	1	3.02
L 1	254-2	2	4	2	3.64
L 1	254-2	2	4	3	4.02
L 1	254-2	2	4	4	3.17
L 1	254-2	3	4	1	4.2
L 1	254-2	3	4	2	2.19
L 1	254-2	3	4	3	3.24
L 1	254-2	3	4	4	4.24
L 1	254-8	1	4	1	4.01
L 1	254-8	1	4	2	4.32
L 1	254-8	1	4	3	5.05
L 1	254-8	1	4	4	4.56
L 1	254-8	2	4	1	8.36
L 1	254-8	2	4	2	8.51
L 1	254-8	2	4	3	8.52
L 1	254-8	2	4	4	7.55
L 1	254-8	3	4	1	5.31
L 1	254-8	3	4	2	8.34
L 1	254-8	3	4	3	7.57
L 1	254-8	3	4	4	6.6
L 1	254-11	1	4	1	6.96
L 1	254-11	1	4	2	7.26
L 1	254-11	1	4	3	7.86
L 1	254-11	1	4	4	5.73
L 1	254-11	2	4	1	7.13
L 1	254-11	2	4	2	7.79
L 1	254-11	2	4	3	8.15
L 1	254-11	2	4	4	7.53
L 1	254-11	3	4	1	6.68
L 1	254-11	3	4	2	6.73
L 1	254-11	3	4	3	6.97
L 1	254-11	3	4	4	7.83
L 2	9610	1	4	1	8.32
L 2	9610	1	4	2	4.68
L 2	9610	1	4	3	5.14
L 2	9610	1	4	4	5.11
L 2	9610	2	4	1	6.98
L 2	9610	2	4	2	6.71
L 2	9610	2	4	3	5.53
L 2	9610	2	4	4	6.72
L 2	9610	3	4	1	6.44
L 2	9610	3	4	2	7.48
L 2	9610	3	4	3	6.09
L 2	9610	3	4	4	6.95
L 2	9612	1	4	1	3.84
L 2	9612	1	4	2	3.33
L 2	9612	1	4	3	3.41
L 2	9612	1	4	4	3.06
L 2	9612	2	4	1	3.24
L 2	9612	2	4	2	4.46
L 2	9612	2	4	3	4.14
L 2	9612	2	4	4	4.69
L 2	9612	3	4	1	3.32
L 2	9612	3	4	2	2.89
L 2	9612	3	4	3	3.04
L 2	9612	3	4	4	3.37
L 2	9605	1	4	1	3.58
L 2	9605	1	4	2	4.72
L 2	9605	1	4	3	5.35
L 2	9605	1	4	4	4.9
L 2	9605	2	4	1	3.03
L 2	9605	2	4	2	2.66
L 2	9605	2	4	3	3.26
L 2	9605	2	4	4	2.84
L 2	9605	3	4	1	2.71
L 2	9605	3	4	2	2.34
L 2	9605	3	4	3	2.01
L 2	9605	3	4	4	2.5
L 2	748	1	4	1	5.36
L 2	748	1	4	2	4.15
L 2	748	1	4	3	4.74
L 2	748	1	4	4	5.41
L 2	748	2	4	1	6.24
L 2	748	2	4	2	5.8
L 2	748	2	4	3	5.08
L 2	748	2	4	4	5.66
L 2	748	3	4	1	6.16
L 2	748	3	4	2	5.08
L 2	748	3	4	3	5.12
L 2	748	3	4	4	5.4
L 2	9401	1	4	1	5.19
L 2	9401	1	4	2	4.16
L 2	9401	1	4	3	8.62
L 2	9401	1	4	4	7.13
L 2	9401	2	4	1	6.68
L 2	9401	2	4	2	9.46
L 2	9401	2	4	3	11.06
L 2	9401	2	4	4	7.38
L 2	9401	3	4	1	7.01
L 2	9401	3	4	2	10.3
L 2	9401	3	4	3	11.78
L 2	9401	3	4	4	10.29
L 2	9174	1	4	1	6.4
L 2	9174	1	4	2	6.8
L 2	9174	1	4	3	7.34
L 2	9174	1	4	4	6.31
L 2	9174	2	4	1	6.5
L 2	9174	2	4	2	7.04
L 2	9174	2	4	3	6.45
L 2	9174	2	4	4	6.69
L2	9174	3	4	1	7.33
L 2	9174	3	4	2	7.95
L 2	9174	3	4	3	7.36
L 2	9174	3	4	4	7.8
L 2	9732	1	4	1	4.42
L 2	9732	1	4	2	4.07
L 2	9732	1	4	3	4.7
L 2	9732	1	4	4	4.59
L 2	9732	2	4	1	4.21
L 2	9732	2	4	2	2.03
L 2	9732	2	4	3	4.28
L 2	9732	2	4	4	3.93
L 2	9732	3	4	1	3.64
L 2	9732	3	4	2	3.27
L 2	9732	3	4	3	2.86
L 2	9732	3	4	4	3.54
L 2	9714	1	4	1	5.02
L 2	9714	1	4	2	4.57
L 2	9714	1	4	3	4.6
L 2	9714	1	4	4	5.47
L 2	9714	2	4	1	4.68
L 2	9714	2	4	2	4.15
L 2	9714	2	4	3	5.65
L 2	9714	2	4	4	4.76
L 2	9714	3	4	1	4.86
L 2	9714	3	4	2	5.55
L 2	9714	3	4	3	5.39
L 2	9714	3	4	4	5.59
L 2	0006	1	4	1	7.46
L 2	0006	1	4	2	8.44
L 2	0006	1	4	3	8.91
L 2	0006	1	4	4	8.37
L 2	0006	2	4	1	7.25
L 2	0006	2	4	2	6.93
L 2	0006	2	4	3	6.95
L 2	0006	2	4	4	7.31
L 2	0006	3	4	1	6.77
L 2	0006	3	4	2	8.41
L 2	0006	3	4	3	7.6
L 2	0006	3	4	4	7.81
L 2	254-2	1	4	1	6.15
L 2	254-2	1	4	2	6.72
L 2	254-2	1	4	3	5.37
L 2	254-2	1	4	4	6.28
L 2	254-2	2	4	1	7.48
L 2	254-2	2	4	2	6.9
L 2	254-2	2	4	3	4.98
L 2	254-2	2	4	4	6.27
L 2	254-2	3	4	1	5.48
L 2	254-2	3	4	2	5.63
L 2	254-2	3	4	3	4.5
L 2	254-2	3	4	4	4.85
L 2	254-8	1	4	1	8.79
L 2	254-8	1	4	2	9.12
L 2	254-8	1	4	3	8.31
L 2	254-8	1	4	4	9.12
L 2	254-8	2	4	1	8.44
L 2	254-8	2	4	2	8.49
L 2	254-8	2	4	3	8.27
L 2	254-8	2	4	4	8.63
L 2	254-8	3	4	1	8.04
L 2	254-8	3	4	2	8.34
L 2	254-8	3	4	3	8.57
L 2	254-8	3	4	4	8.4
L 2	254-11	1	4	1	6.67
L 2	254-11	1	4	2	7.61
L 2	254-11	1	4	3	6.05
L 2	254-11	1	4	4	7.24
L 2	254-11	2	4	1	7.98
L 2	254-11	2	4	2	8.84
L 2	254-11	2	4	3	7.32
L 2	254-11	2	4	4	8.11
L 2	254-11	3	4	1	8.54
L 2	254-11	3	4	2	7.9
L 2	254-11	3	4	3	8.96
L 2	254-11	3	4	4	8.49
L 3	9610	1	4	1	7.55
L 3	9610	1	4	2	8.57
L 3	9610	1	4	3	8.52
L 3	9610	1	4	4	7.56
L 3	9610	2	4	1	7.02
L 3	9610	2	4	2	7.3
L 3	9610	2	4	3	7.25
L 3	9610	2	4	4	6.96
L 3	9610	3	4	1	8.11
L 3	9610	3	4	2	8.25
L 3	9610	3	4	3	8.56
L 3	9610	3	4	4	8.75
L 3	9612	1	4	1	6.56
L 3	9612	1	4	2	7.62
L 3	9612	1	4	3	6.5
L 3	9612	1	4	4	7.21
L 3	9612	2	4	1	6.26
L 3	9612	2	4	2	6.57
L 3	9612	2	4	3	7.08
L 3	9612	2	4	4	6.48
L 3	9612	3	4	1	5.5
L 3	9612	3	4	2	6.65
L 3	9612	3	4	3	5.88
L 3	9612	3	4	4	6.38
L 3	9605	1	4	1	6.25
L 3	9605	1	4	2	5.86
L 3	9605	1	4	3	6.27
L 3	9605	1	4	4	6.1
L 3	9605	2	4	1	7.12
L 3	9605	2	4	2	8.7
L 3	9605	2	4	3	8.1
L 3	9605	2	4	4	7.94
L 3	9605	3	4	1	7.62
L 3	9605	3	4	2	6.57
L 3	9605	3	4	3	6.78
L 3	9605	3	4	4	6.98
L 3	748	1	4	1	6.24
L 3	748	1	4	2	7.89
L 3	748	1	4	3	8.46
L 3	748	1	4	4	6.32
L 3	748	2	4	1	8.71
L 3	748	2	4	2	7.44
L 3	748	2	4	3	7.18
L 3	748	2	4	4	7.58
L 3	748	3	4	1	6.94
L 3	748	3	4	2	6.6
L 3	748	3	4	3	7.48
L 3	748	3	4	4	8.39
L 3	9401	1	4	1	10.65
L 3	9401	1	4	2	11.24
L 3	9401	1	4	3	11.7
L 3	9401	1	4	4	10.36
L 3	9401	2	4	1	11.69
L 3	9401	2	4	2	10.78
L 3	9401	2	4	3	11.3
L 3	9401	2	4	4	12.32
L 3	9401	3	4	1	7.84
L 3	9401	3	4	2	9.05
L 3	9401	3	4	3	11.5
L 3	9401	3	4	4	10.87
L 3	9174	1	4	1	8.14
L 3	9174	1	4	2	9.5
L 3	9174	1	4	3	8.98
L 3	9174	1	4	4	8.39
L 3	9174	2	4	1	7.74
L 3	9174	2	4	2	7.76
L 3	9174	2	4	3	8.45
L 3	9174	2	4	4	7.8
L 3	9174	3	4	1	8.52
L 3	9174	3	4	2	7.05
L 3	9174	3	4	3	9.01
L 3	9174	3	4	4	8.91
L 3	9732	1	4	1	5.72
L 3	9732	1	4	2	5.19
L 3	9732	1	4	3	5.09
L 3	9732	1	4	4	5.85
L 3	9732	2	4	1	5.39
L 3	9732	2	4	2	5.94
L 3	9732	2	4	3	2.9
L 3	9732	2	4	4	6.2
L 3	9732	3	4	1	5.67
L 3	9732	3	4	2	7.02
L 3	9732	3	4	3	6.54
L 3	9732	3	4	4	7.03
L 3	9714	1	4	1	4.87
L 3	9714	1	4	2	6.26
L 3	9714	1	4	3	6.07
L 3	9714	1	4	4	3.55
L 3	9714	2	4	1	4.68
L 3	9714	2	4	2	3.06
L 3	9714	2	4	3	6.63
L 3	9714	2	4	4	3.38
L 3	9714	3	4	1	4.12
L 3	9714	3	4	2	5.62
L 3	9714	3	4	3	5.89
L 3	9714	3	4	4	3.15
L 3	0006	1	4	1	8.11
L 3	0006	1	4	2	8.86
L 3	0006	1	4	3	8.33
L 3	0006	1	4	4	8.87
L 3	0006	2	4	1	9.91
L 3	0006	2	4	2	9.65
L 3	0006	2	4	3	8.72
L 3	0006	2	4	4	8.9
L 3	0006	3	4	1	7.63
L 3	0006	3	4	2	8.3
L 3	0006	3	4	3	7.67
L 3	0006	3	4	4	8.01
L 3	254-2	1	4	1	5.04
L 3	254-2	1	4	2	7.65
L 3	254-2	1	4	3	7.52
L 3	254-2	1	4	4	6.89
L 3	254-2	2	4	1	8.36
L 3	254-2	2	4	2	8.61
L 3	254-2	2	4	3	7.91
L 3	254-2	2	4	4	8.25
L 3	254-2	3	4	1	3.34
L 3	254-2	3	4	2	7.1
L 3	254-2	3	4	3	6.65
L 3	254-2	3	4	4	7.12
L 3	254-8	1	4	1	7.82
L 3	254-8	1	4	2	8.22
L 3	254-8	1	4	3	8.97
L 3	254-8	1	4	4	9.21
L 3	254-8	2	4	1	6.58
L 3	254-8	2	4	2	7.92
L 3	254-8	2	4	3	9.54
L 3	254-8	2	4	4	6.65
L 3	254-8	3	4	1	9.3
L 3	254-8	3	4	2	8.23
L 3	254-8	3	4	3	8.12
L 3	254-8	3	4	4	7.56
L 3	254-11	1	4	1	7.83
L 3	254-11	1	4	2	8.41
L 3	254-11	1	4	3	9.04
L 3	254-11	1	4	4	8.28
L 3	254-11	2	4	1	8.52
L 3	254-11	2	4	2	9.1
L 3	254-11	2	4	3	10.58
L 3	254-11	2	4	4	9.02
L 3	254-11	3	4	1	8.09
L 3	254-11	3	4	2	8.28
L 3	254-11	3	4	3	8.47
L 3	254-11	3	4	4	8.65
LO 2	9610	1	4	1	6.06
LO 2	9610	1	4	2	6.59
LO 2	9610	1	4	3	6.63
LO 2	9610	1	4	4	6.86
LO 2	9610	2	4	1	6.11
LO 2	9610	2	4	2	5.58
LO 2	9610	2	4	3	5.67
LO 2	9610	2	4	4	6.7
LO 2	9610	3	4	1	5.33
LO 2	9610	3	4	2	5.07
LO 2	9610	3	4	3	5.7
LO 2	9610	3	4	4	5.09
LO 2	9612	1	4	1	4.56
LO 2	9612	1	4	2	5.62
LO 2	9612	1	4	3	4.5
LO 2	9612	1	4	4	5.21
LO 2	9612	2	4	1	4.26
LO 2	9612	2	4	2	4.57
LO 2	9612	2	4	3	5.08
LO 2	9612	2	4	4	4.48
LO 2	9612	3	4	1	3.5
LO 2	9612	3	4	2	4.65
LO 2	9612	3	4	3	3.88
LO 2	9612	3	4	4	4.38
LO 2	9605	1	4	1	3.05
LO 2	9605	1	4	2	2.7
LO 2	9605	1	4	3	4.45
LO 2	9605	1	4	4	4.88
LO 2	9605	2	4	1	3.96
LO 2	9605	2	4	2	3.85
LO 2	9605	2	4	3	2.87
LO 2	9605	2	4	4	3.62
LO 2	9605	3	4	1	4.28
LO 2	9605	3	4	2	2.57
LO 2	9605	3	4	3	3.97
LO 2	9605	3	4	4	4.26
LO 2	748	1	4	1	2.59
LO 2	748	1	4	2	1.78
LO 2	748	1	4	3	2.56
LO 2	748	1	4	4	3.37
LO 2	748	2	4	1	3.15
LO 2	748	2	4	2	2.66
LO 2	748	2	4	3	3.22
LO 2	748	2	4	4	2.84
LO 2	748	3	4	1	3.37
LO 2	748	3	4	2	2.46
LO 2	748	3	4	3	2.78
LO 2	748	3	4	4	4.18
LO 2	9401	1	4	1	5.15
LO 2	9401	1	4	2	6.18
LO 2	9401	1	4	3	8.12
LO 2	9401	1	4	4	5.8
LO 2	9401	2	4	1	8.59
LO 2	9401	2	4	2	5.07
LO 2	9401	2	4	3	7.78
LO 2	9401	2	4	4	8.64
LO 2	9401	3	4	1	2.44
LO 2	9401	3	4	2	2.58
LO 2	9401	3	4	3	4.03
LO 2	9401	3	4	4	3.13
LO 2	9174	1	4	1	5.58
LO 2	9174	1	4	2	7.5
LO 2	9174	1	4	3	3.64
LO 2	9174	1	4	4	8.59
LO 2	9174	2	4	1	3.93
LO 2	9174	2	4	2	7.71
LO 2	9174	2	4	3	3.15
LO 2	9174	2	4	4	3.9
LO 2	9174	3	4	1	7.26
LO 2	9174	3	4	2	7.68
LO 2	9174	3	4	3	7.23
LO 2	9174	3	4	4	8.41
LO 2	9732	1	4	1	2.07
LO 2	9732	1	4	2	2.8
LO 2	9732	1	4	3	2.91
LO 2	9732	1	4	4	1.43
LO 2	9732	2	4	1	3.45
LO 2	9732	2	4	2	2.07
LO 2	9732	2	4	3	3.56
LO 2	9732	2	4	4	3.83
LO 2	9732	3	4	1	1.65
LO 2	9732	3	4	2	2.67
LO 2	9732	3	4	3	3.06
LO 2	9732	3	4	4	2.77
LO 2	9714	1	4	1	3.46
LO 2	9714	1	4	2	5.27
LO 2	9714	1	4	3	4.98
LO 2	9714	1	4	4	4.03
LO 2	9714	2	4	1	4.08
LO 2	9714	2	4	2	4.71
LO 2	9714	2	4	3	3.4
LO 2	9714	2	4	4	3.19
LO 2	9714	3	4	1	2.42
LO 2	9714	3	4	2	3.06
LO 2	9714	3	4	3	3.97
LO 2	9714	3	4	4	2.08
LO 2	0006	1	4	1	6.64
LO 2	0006	1	4	2	7.5
LO 2	0006	1	4	3	6.09
LO 2	0006	1	4	4	7.39
LO 2	0006	2	4	1	7.56
LO 2	0006	2	4	2	7.19
LO 2	0006	2	4	3	7.53
LO 2	0006	2	4	4	6.99
LO 2	0006	3	4	1	6.24
LO 2	0006	3	4	2	6.72
LO 2	0006	3	4	3	7.83
LO 2	0006	3	4	4	6.27
LO 2	254-2	1	4	1	6.08
LO 2	254-2	1	4	2	4.38
LO 2	254-2	1	4	3	4.26
LO 2	254-2	1	4	4	3.8
LO 2	254-2	2	4	1	2.21
LO 2	254-2	2	4	2	4.09
LO 2	254-2	2	4	3	3.16
LO 2	254-2	2	4	4	3.53
LO 2	254-2	3	4	1	1.87
LO 2	254-2	3	4	2	3.86
LO 2	254-2	3	4	3	3.1
LO 2	254-2	3	4	4	2.45
LO 2	254-8	1	4	1	6.86
LO 2	254-8	1	4	2	5.08
LO 2	254-8	1	4	3	6.13
LO 2	254-8	1	4	4	8.14
LO 2	254-8	2	4	1	6.33
LO 2	254-8	2	4	2	7.03
LO 2	254-8	2	4	3	6.55
LO 2	254-8	2	4	4	4.97
LO 2	254-8	3	4	1	7.97
LO 2	254-8	3	4	2	6.62
LO 2	254-8	3	4	3	8.65
LO 2	254-8	3	4	4	7.24
LO 2	254-11	1	4	1	8.3
LO 2	254-11	1	4	2	8.72
LO 2	254-11	1	4	3	8.81
LO 2	254-11	1	4	4	8.42
LO 2	254-11	2	4	1	7.03
LO 2	254-11	2	4	2	7.83
LO 2	254-11	2	4	3	7.28
LO 2	254-11	2	4	4	8.21
LO 2	254-11	3	4	1	7.25
LO 2	254-11	3	4	2	7.62
LO 2	254-11	3	4	3	7.51
LO 2	254-11	3	4	4	8.01
LO 1	9610	1	4	1	7.03
LO 1	9610	1	4	2	7.62
LO 1	9610	1	4	3	7.68
LO 1	9610	1	4	4	7.28
LO 1	9610	2	4	1	6.64
LO 1	9610	2	4	2	6.35
LO 1	9610	2	4	3	6.65
LO 1	9610	2	4	4	5.65
LO 1	9610	3	4	1	6.7
LO 1	9610	3	4	2	6.65
LO 1	9610	3	4	3	6.36
LO 1	9610	3	4	4	6.31
LO 1	9612	1	4	1	2.12
LO 1	9612	1	4	2	1.93
LO 1	9612	1	4	3	2.3
LO 1	9612	1	4	4	2.09
LO 1	9612	2	4	1	1.95
LO 1	9612	2	4	2	2.2
LO 1	9612	2	4	3	2.25
LO 1	9612	2	4	4	2.57
LO 1	9612	3	4	1	3.16
LO 1	9612	3	4	2	2.81
LO 1	9612	3	4	3	3.08
LO 1	9612	3	4	4	3.15
LO 1	9605	1	4	1	2.12
LO 1	9605	1	4	2	1.93
LO 1	9605	1	4	3	2.3
LO 1	9605	1	4	4	2.09
LO 1	9605	2	4	1	1.83
LO 1	9605	2	4	2	2.02
LO 1	9605	2	4	3	2.11
LO 1	9605	2	4	4	2.3
LO 1	9605	3	4	1	3.37
LO 1	9605	3	4	2	3.81
LO 1	9605	3	4	3	3.7
LO 1	9605	3	4	4	5.96
LO 1	748	1	4	1	3.9
LO 1	748	1	4	2	3.85
LO 1	748	1	4	3	3.96
LO 1	748	1	4	4	4.33
LO 1	748	2	4	1	3.59
LO 1	748	2	4	2	2.64
LO 1	748	2	4	3	3.48
LO 1	748	2	4	4	3.31
LO 1	748	3	4	1	3.96
LO 1	748	3	4	2	2.68
LO 1	748	3	4	3	2.91
LO 1	748	3	4	4	3.13
LO 1	9401	1	4	1	9.51
LO 1	9401	1	4	2	8.3
LO 1	9401	1	4	3	6.45
LO 1	9401	1	4	4	8.21
LO 1	9401	2	4	1	4.7
LO 1	9401	2	4	2	6.21
LO 1	9401	2	4	3	5.67
LO 1	9401	2	4	4	5.65
LO 1	9401	3	4	1	8.2
LO 1	9401	3	4	2	7.9
LO 1	9401	3	4	3	8.72
LO 1	9401	3	4	4	9.46
LO 1	9174	1	4	1	7.06
LO 1	9174	1	4	2	7.65
LO 1	9174	1	4	3	6.26
LO 1	9174	1	4	4	8.35
LO 1	9174	2	4	1	7.63
LO 1	9174	2	4	2	9.27
LO 1	9174	2	4	3	2.68
LO 1	9174	2	4	4	7.69
LO 1	9174	3	4	1	7.32
LO 1	9174	3	4	2	8.06
LO 1	9174	3	4	3	2.02
LO 1	9174	3	4	4	0.7
LO 1	9732	1	4	1	2.73
LO 1	9732	1	4	2	3.7
LO 1	9732	1	4	3	2.94
LO 1	9732	1	4	4	3.38
LO 1	9732	2	4	1	3.02
LO 1	9732	2	4	2	2.7
LO 1	9732	2	4	3	3.43
LO 1	9732	2	4	4	2.07
LO 1	9732	3	4	1	1.84
LO 1	9732	3	4	2	3.5
LO 1	9732	3	4	3	1.21
LO 1	9732	3	4	4	2.98
LO 1	9714	1	4	1	4.43
LO 1	9714	1	4	2	4.15
LO 1	9714	1	4	3	2.35
LO 1	9714	1	4	4	4.03
LO 1	9714	2	4	1	3.17
LO 1	9714	2	4	2	2.2
LO 1	9714	2	4	3	2.59
LO 1	9714	2	4	4	1.75
LO 1	9714	3	4	1	1.39
LO 1	9714	3	4	2	0.9
LO 1	9714	3	4	3	2.16
LO 1	9714	3	4	4	1.92
LO 1	0006	1	4	1	5.92
LO 1	0006	1	4	2	6.14
LO 1	0006	1	4	3	5.6
LO 1	0006	1	4	4	5.73
LO 1	0006	2	4	1	5.93
LO 1	0006	2	4	2	6.69
LO 1	0006	2	4	3	5.57
LO 1	0006	2	4	4	5.31
LO 1	0006	3	4	1	5.56
LO 1	0006	3	4	2	6.06
LO 1	0006	3	4	3	5.67
LO 1	0006	3	4	4	6.08
LO 1	254-2	1	4	1	6.8
LO 1	254-2	1	4	2	5.94
LO 1	254-2	1	4	3	1.6
LO 1	254-2	1	4	4	3.12
LO 1	254-2	2	4	1	5.57
LO 1	254-2	2	4	2	5.27
LO 1	254-2	2	4	3	5.44
LO 1	254-2	2	4	4	2.88
LO 1	254-2	3	4	1	8.54
LO 1	254-2	3	4	2	8.5
LO 1	254-2	3	4	3	3.64
LO 1	254-2	3	4	4	5.78
LO 1	254-8	1	4	1	4.36
LO 1	254-8	1	4	2	6.75
LO 1	254-8	1	4	3	7.17
LO 1	254-8	1	4	4	5.74
LO 1	254-8	2	4	1	5.41
LO 1	254-8	2	4	2	7.2
LO 1	254-8	2	4	3	5.42
LO 1	254-8	2	4	4	7.95
LO 1	254-8	3	4	1	8.41
LO 1	254-8	3	4	2	10.43
LO 1	254-8	3	4	3	8.32
LO 1	254-8	3	4	4	7.26
LO 1	254-11	1	4	1	9.13
LO 1	254-11	1	4	2	8.25
LO 1	254-11	1	4	3	9.84
LO 1	254-11	1	4	4	8.41
LO 1	254-11	2	4	1	8.02
LO 1	254-11	2	4	2	8.43
LO 1	254-11	2	4	3	7.9
LO 1	254-11	2	4	4	7.53
LO 1	254-11	3	4	1	6.5
LO 1	254-11	3	4	2	6.96
LO 1	254-11	3	4	3	7.16
LO 1	254-11	3	4	4	8.37
OT 1	9610	1	4	1	6.71
OT 1	9610	1	4	2	8.95
OT 1	9610	1	4	3	6.94
OT 1	9610	1	4	4	7.12
OT 1	9610	2	4	1	7.02
OT 1	9610	2	4	2	7.37
OT 1	9610	2	4	3	8.15
OT 1	9610	2	4	4	8.44
OT 1	9610	3	4	1	8.2
OT 1	9610	3	4	2	6.45
OT 1	9610	3	4	3	6.93
OT 1	9610	3	4	4	7.41
OT 1	9612	1	4	1	6.03
OT 1	9612	1	4	2	4.83
OT 1	9612	1	4	3	3.2
OT 1	9612	1	4	4	4.57
OT 1	9612	2	4	1	3.89
OT 1	9612	2	4	2	3.1
OT 1	9612	2	4	3	3.42
OT 1	9612	2	4	4	5
OT 1	9612	3	4	1	5.35
OT 1	9612	3	4	2	4.42
OT 1	9612	3	4	3	5.39
OT 1	9612	3	4	4	4.88
OT 1	9605	1	4	1	2.4
OT 1	9605	1	4	2	1.7
OT 1	9605	1	4	3	1.5
OT 1	9605	1	4	4	1.9
OT 1	9605	2	4	1	1.61
OT 1	9605	2	4	2	1.8
OT 1	9605	2	4	3	1.63
OT 1	9605	2	4	4	2.19
OT 1	9605	3	4	1	3.27
OT 1	9605	3	4	2	3.95
OT 1	9605	3	4	3	1.7
OT 1	9605	3	4	4	1.37
OT 1	748	1	4	1	3.6
OT 1	748	1	4	2	9.71
OT 1	748	1	4	3	8.47
OT 1	748	1	4	4	8.42
OT 1	748	2	4	1	7.78
OT 1	748	2	4	2	9.29
OT 1	748	2	4	3	9.3
OT 1	748	2	4	4	8.16
OT 1	748	3	4	1	8.16
OT 1	748	3	4	2	9.79
OT 1	748	3	4	3	9.74
OT 1	748	3	4	4	8.45
OT 1	9401	1	4	1	10.95
OT 1	9401	1	4	2	10.47
OT 1	9401	1	4	3	10.78
OT 1	9401	1	4	4	9.52
OT 1	9401	2	4	1	9.39
OT 1	9401	2	4	2	8.17
OT 1	9401	2	4	3	8.96
OT 1	9401	2	4	4	9.13
OT 1	9401	3	4	1	10.18
OT 1	9401	3	4	2	9.43
OT 1	9401	3	4	3	11.28
OT 1	9401	3	4	4	11.58
OT 1	9174	1	4	1	9.68
OT 1	9174	1	4	2	8.45
OT 1	9174	1	4	3	8.05
OT 1	9174	1	4	4	7.91
OT 1	9174	2	4	1	10.21
OT 1	9174	2	4	2	8.78
OT 1	9174	2	4	3	9.65
OT 1	9174	2	4	4	9.33
OT 1	9174	3	4	1	7.54
OT 1	9174	3	4	2	8.31
OT 1	9174	3	4	3	8.05
OT 1	9174	3	4	4	9.48
OT 1	9732	1	4	1	3.98
OT 1	9732	1	4	2	2.86
OT 1	9732	1	4	3	2.88
OT 1	9732	1	4	4	2.72
OT 1	9732	2	4	1	2.88
OT 1	9732	2	4	2	2.28
OT 1	9732	2	4	3	2.25
OT 1	9732	2	4	4	2.11
OT 1	9732	3	4	1	2.27
OT 1	9732	3	4	2	1.78
OT 1	9732	3	4	3	1.52
OT 1	9732	3	4	4	2.06
OT 1	9714	1	4	1	5.28
OT 1	9714	1	4	2	5.16
OT 1	9714	1	4	3	5.2
OT 1	9714	1	4	4	5.76
OT 1	9714	2	4	1	3.58
OT 1	9714	2	4	2	4.71
OT 1	9714	2	4	3	5.23
OT 1	9714	2	4	4	4.5
OT 1	9714	3	4	1	2.97
OT 1	9714	3	4	2	3.87
OT 1	9714	3	4	3	4.76
OT 1	9714	3	4	4	4.45
OT 1	0006	1	4	1	10.23
OT 1	0006	1	4	2	12.75
OT 1	0006	1	4	3	12.05
OT 1	0006	1	4	4	13.13
OT 1	0006	2	4	1	14.11
OT 1	0006	2	4	2	15.4
OT 1	0006	2	4	3	14.32
OT 1	0006	2	4	4	13.3
OT 1	0006	3	4	1	13.34
OT 1	0006	3	4	2	12.28
OT 1	0006	3	4	3	14
OT 1	0006	3	4	4	12.89
OT 1	254-2	1	4	1	4
OT 1	254-2	1	4	2	2.67
OT 1	254-2	1	4	3	3.73
OT 1	254-2	1	4	4	1.98
OT 1	254-2	2	4	1	4.16
OT 1	254-2	2	4	2	3.69
OT 1	254-2	2	4	3	3.73
OT 1	254-2	2	4	4	2.1
OT 1	254-2	3	4	1	6.26
OT 1	254-2	3	4	2	5.07
OT 1	254-2	3	4	3	4.26
OT 1	254-2	3	4	4	5.27
OT 1	254-8	1	4	1	9
OT 1	254-8	1	4	2	8.72
OT 1	254-8	1	4	3	8.35
OT 1	254-8	1	4	4	7.55
OT 1	254-8	2	4	1	8.14
OT 1	254-8	2	4	2	7.2
OT 1	254-8	2	4	3	8.59
OT 1	254-8	2	4	4	8.74
OT 1	254-8	3	4	1	7.84
OT 1	254-8	3	4	2	9.34
OT 1	254-8	3	4	3	8.51
OT 1	254-8	3	4	4	8.31
OT 1	254-11	1	4	1	11.61
OT 1	254-11	1	4	2	10.3
OT 1	254-11	1	4	3	10.94
OT 1	254-11	1	4	4	11.72
OT 1	254-11	2	4	1	11.17
OT 1	254-11	2	4	2	6.19
OT 1	254-11	2	4	3	10.05
OT 1	254-11	2	4	4	9.12
OT 1	254-11	3	4	1	14.82
OT 1	254-11	3	4	2	11.18
OT 1	254-11	3	4	3	11.7
OT 1	254-11	3	4	4	12.43
OT 2	9610	1	4	1	4.26
OT 2	9610	1	4	2	5.19
OT 2	9610	1	4	3	7.23
OT 2	9610	1	4	4	7.13
OT 2	9610	2	4	1	4.94
OT 2	9610	2	4	2	3.5
OT 2	9610	2	4	3	7.18
OT 2	9610	2	4	4	4.24
OT 2	9610	3	4	1	6.06
OT 2	9610	3	4	2	7.47
OT 2	9610	3	4	3	7.03
OT 2	9610	3	4	4	7.21
OT 2	9612	1	4	1	2.15
OT 2	9612	1	4	2	1.74
OT 2	9612	1	4	3	2.05
OT 2	9612	1	4	4	1.8
OT 2	9612	2	4	1	1.9
OT 2	9612	2	4	2	2.06
OT 2	9612	2	4	3	1.83
OT 2	9612	2	4	4	1.81
OT 2	9612	3	4	1	2.1
OT 2	9612	3	4	2	1.89
OT 2	9612	3	4	3	2.07
OT 2	9612	3	4	4	1.87
OT 2	9605	1	4	1	1.43
OT 2	9605	1	4	2	1.73
OT 2	9605	1	4	3	1.86
OT 2	9605	1	4	4	3.67
OT 2	9605	2	4	1	1.08
OT 2	9605	2	4	2	1.42
OT 2	9605	2	4	3	2.36
OT 2	9605	2	4	4	3.76
OT 2	9605	3	4	1	2.27
OT 2	9605	3	4	2	1.5
OT 2	9605	3	4	3	1.03
OT 2	9605	3	4	4	1.66
OT 2	748	1	4	1	3.81
OT 2	748	1	4	2	4.01
OT 2	748	1	4	3	4.02
OT 2	748	1	4	4	2.94
OT 2	748	2	4	1	3.81
OT 2	748	2	4	2	4.06
OT 2	748	2	4	3	4.02
OT 2	748	2	4	4	2.94
OT 2	748	3	4	1	5.27
OT 2	748	3	4	2	5.38
OT 2	748	3	4	3	6.04
OT 2	748	3	4	4	5.55
OT 2	9401	1	4	1	10.15
OT 2	9401	1	4	2	11.6
OT 2	9401	1	4	3	8.8
OT 2	9401	1	4	4	19.1
OT 2	9401	2	4	1	12.22
OT 2	9401	2	4	2	10.15
OT 2	9401	2	4	3	6.68
OT 2	9401	2	4	4	11.71
OT 2	9401	3	4	1	13
OT 2	9401	3	4	2	13.74
OT 2	9401	3	4	3	12.08
OT 2	9401	3	4	4	12.77
OT 2	9174	1	4	1	8.26
OT 2	9174	1	4	2	8.24
OT 2	9174	1	4	3	8.64
OT 2	9174	1	4	4	8.44
OT 2	9174	2	4	1	9.28
OT 2	9174	2	4	2	8.61
OT 2	9174	2	4	3	8.16
OT 2	9174	2	4	4	8.74
OT 2	9174	3	4	1	8.93
OT 2	9174	3	4	2	9.52
OT 2	9174	3	4	3	10.41
OT 2	9174	3	4	4	8.39
OT 2	9732	1	4	1	1.66
OT 2	9732	1	4	2	2.05
OT 2	9732	1	4	3	2.66
OT 2	9732	1	4	4	1.61
OT 2	9732	2	4	1	2.2
OT 2	9732	2	4	2	1.77
OT 2	9732	2	4	3	1.78
OT 2	9732	2	4	4	2.09
OT 2	9732	3	4	1	1.95
OT 2	9732	3	4	2	1.99
OT 2	9732	3	4	3	2.08
OT 2	9732	3	4	4	1.7
OT 2	9714	1	4	1	5
OT 2	9714	1	4	2	4.31
OT 2	9714	1	4	3	4.71
OT 2	9714	1	4	4	5.12
OT 2	9714	2	4	1	5.56
OT 2	9714	2	4	2	2.89
OT 2	9714	2	4	3	3.46
OT 2	9714	2	4	4	2.38
OT 2	9714	3	4	1	5.16
OT 2	9714	3	4	2	4.88
OT 2	9714	3	4	3	5.72
OT 2	9714	3	4	4	5.93
OT 2	0006	1	4	1	9.52
OT 2	0006	1	4	2	9.86
OT 2	0006	1	4	3	10.67
OT 2	0006	1	4	4	11.94
OT 2	0006	2	4	1	12.44
OT 2	0006	2	4	2	13.52
OT 2	0006	2	4	3	12.46
OT 2	0006	2	4	4	13.74
OT 2	0006	3	4	1	11.72
OT 2	0006	3	4	2	10.3
OT 2	0006	3	4	3	11.63
OT 2	0006	3	4	4	11.56
OT 2	254-2	1	4	1	1.92
OT 2	254-2	1	4	2	5.31
OT 2	254-2	1	4	3	4.51
OT 2	254-2	1	4	4	5.35
OT 2	254-2	2	4	1	1.36
OT 2	254-2	2	4	2	1.42
OT 2	254-2	2	4	3	3.67
OT 2	254-2	2	4	4	5.39
OT 2	254-2	3	4	1	5.64
OT 2	254-2	3	4	2	1.65
OT 2	254-2	3	4	3	5.19
OT 2	254-2	3	4	4	4.24
OT 2	254-8	1	4	1	5.84
OT 2	254-8	1	4	2	3.08
OT 2	254-8	1	4	3	2.41
OT 2	254-8	1	4	4	3.15
OT 2	254-8	2	4	1	4.69
OT 2	254-8	2	4	2	6.07
OT 2	254-8	2	4	3	5.16
OT 2	254-8	2	4	4	6.73
OT 2	254-8	3	4	1	2.69
OT 2	254-8	3	4	2	5
OT 2	254-8	3	4	3	4.41
OT 2	254-8	3	4	4	3.16
OT 2	254-11	1	4	1	5.44
OT 2	254-11	1	4	2	8.21
OT 2	254-11	1	4	3	5.76
OT 2	254-11	1	4	4	6.17
OT 2	254-11	2	4	1	8.22
OT 2	254-11	2	4	2	9.11
OT 2	254-11	2	4	3	10.52
OT 2	254-11	2	4	4	7.32
OT 2	254-11	3	4	1	10.53
OT 2	254-11	3	4	2	8.74
OT 2	254-11	3	4	3	8.23
OT 2	254-11	3	4	4	10.18
OT 3	9610	1	4	1	6.15
OT 3	9610	1	4	2	5.93
OT 3	9610	1	4	3	5.64
OT 3	9610	1	4	4	5.81
OT 3	9610	2	4	1	5.35
OT 3	9610	2	4	2	5.65
OT 3	9610	2	4	3	6.18
OT 3	9610	2	4	4	5.45
OT 3	9610	3	4	1	5.76
OT 3	9610	3	4	2	5.67
OT 3	9610	3	4	3	5.88
OT 3	9610	3	4	4	6.16
OT 3	9612	1	4	1	2.64
OT 3	9612	1	4	2	2.84
OT 3	9612	1	4	3	3.31
OT 3	9612	1	4	4	3.26
OT 3	9612	2	4	1	1.68
OT 3	9612	2	4	2	1.93
OT 3	9612	2	4	3	1.96
OT 3	9612	2	4	4	2.48
OT 3	9612	3	4	1	2.14
OT 3	9612	3	4	2	1.78
OT 3	9612	3	4	3	1.83
OT 3	9612	3	4	4	2.15
OT 3	9605	1	4	1	2.08
OT 3	9605	1	4	2	1.7
OT 3	9605	1	4	3	3.43
OT 3	9605	1	4	4	2.76
OT 3	9605	2	4	1	2.27
OT 3	9605	2	4	2	1.98
OT 3	9605	2	4	3	1.96
OT 3	9605	2	4	4	3.67
OT 3	9605	3	4	1	2.68
OT 3	9605	3	4	2	4.24
OT 3	9605	3	4	3	3.85
OT 3	9605	3	4	4	5.24
OT 3	748	1	4	1	2.66
OT 3	748	1	4	2	2.84
OT 3	748	1	4	3	2.53
OT 3	748	1	4	4	2.78
OT 3	748	2	4	1	1.86
OT 3	748	2	4	2	2.16
OT 3	748	2	4	3	2.8
OT 3	748	2	4	4	2.06
OT 3	748	3	4	1	3.05
OT 3	748	3	4	2	2.34
OT 3	748	3	4	3	0
OT 3	748	3	4	4	3.02
OT 3	9401	1	4	1	7.56
OT 3	9401	1	4	2	7.54
OT 3	9401	1	4	3	3.6
OT 3	9401	1	4	4	9.32
OT 3	9401	2	4	1	6.76
OT 3	9401	2	4	2	6.85
OT 3	9401	2	4	3	7.23
OT 3	9401	2	4	4	5.49
OT 3	9401	3	4	1	4.7
OT 3	9401	3	4	2	8.08
OT 3	9401	3	4	3	6.31
OT 3	9401	3	4	4	6.58
OT 3	9174	1	4	1	5.75
OT 3	9174	1	4	2	5.79
OT 3	9174	1	4	3	5.66
OT 3	9174	1	4	4	5.37
OT 3	9174	2	4	1	5.75
OT 3	9174	2	4	2	6.92
OT 3	9174	2	4	3	6.75
OT 3	9174	2	4	4	6.41
OT 3	9174	3	4	1	4.8
OT 3	9174	3	4	2	6.81
OT 3	9174	3	4	3	6.74
OT 3	9174	3	4	4	5.1
OT 3	9732	1	4	1	1.98
OT 3	9732	1	4	2	1.65
OT 3	9732	1	4	3	2.52
OT 3	9732	1	4	4	4.41
OT 3	9732	2	4	1	3.42
OT 3	9732	2	4	2	2.85
OT 3	9732	2	4	3	2.65
OT 3	9732	2	4	4	2.36
OT 3	9732	3	4	1	1.4
OT 3	9732	3	4	2	1.96
OT 3	9732	3	4	3	1.65
OT 3	9732	3	4	4	1.93
OT 3	9714	1	4	1	3.85
OT 3	9714	1	4	2	1.78
OT 3	9714	1	4	3	4.72
OT 3	9714	1	4	4	3.46
OT 3	9714	2	4	1	2.64
OT 3	9714	2	4	2	1.5
OT 3	9714	2	4	3	1.38
OT 3	9714	2	4	4	3.01
OT 3	9714	3	4	1	3.94
OT 3	9714	3	4	2	2.42
OT 3	9714	3	4	3	3.17
OT 3	9714	3	4	4	2.98
OT 3	0006	1	4	1	5.55
OT 3	0006	1	4	2	5.84
OT 3	0006	1	4	3	8.01
OT 3	0006	1	4	4	8.65
OT 3	0006	2	4	1	9.2
OT 3	0006	2	4	2	9.67
OT 3	0006	2	4	3	9.58
OT 3	0006	2	4	4	9.26
OT 3	0006	3	4	1	10.32
OT 3	0006	3	4	2	9.51
OT 3	0006	3	4	3	11.15
OT 3	0006	3	4	4	9.5
OT 3	254-2	1	4	1	3.21
OT 3	254-2	1	4	2	2.3
OT 3	254-2	1	4	3	5.85
OT 3	254-2	1	4	4	4.14
OT 3	254-2	2	4	1	2.6
OT 3	254-2	2	4	2	3.17
OT 3	254-2	2	4	3	2.98
OT 3	254-2	2	4	4	4.55
OT 3	254-2	3	4	1	5.44
OT 3	254-2	3	4	2	1.08
OT 3	254-2	3	4	3	4.86
OT 3	254-2	3	4	4	4.26
OT 3	254-8	1	4	1	5.96
OT 3	254-8	1	4	2	6.15
OT 3	254-8	1	4	3	5.8
OT 3	254-8	1	4	4	6.35
OT 3	254-8	2	4	1	5.48
OT 3	254-8	2	4	2	5.35
OT 3	254-8	2	4	3	6.75
[truncated: 594 more rows]

## Sheet: Flowers
section	be	flower	dpi	spot	ls
A 1	Bcin	1	3	1	12.6
A 1	Bcin	1	3	2	15.2
A 1	Bcin	1	3	3	14.3
A 1	Bcin	1	3	4	15
A 1	Bcin	1	3	5	14.3
A 1	Bcin	2	3	1	14.7
A 1	Bcin	2	3	2	13.7
A 1	Bcin	2	3	3	13.6
A 1	Bcin	2	3	4	15
A 1	Bcin	2	3	5	13.5
A 1	9401	1	3	1	17.7
A 1	9401	1	3	2	21.3
A 1	9401	1	3	3	23.2
A 1	9401	1	3	4	24.7
A 1	9401	1	3	5	24.3
A 1	9401	2	3	1	22.6
A 1	9401	2	3	2	21.2
A 1	9401	2	3	3	20.8
A 1	9401	2	3	4	22.2
A 1	9401	2	3	5	21.7
A 1	0006	1	3	1	27
A 1	0006	1	3	2	24.1
A 1	0006	1	3	3	25.3
A 1	0006	1	3	4	25
A 1	0006	1	3	5	23.7
A 1	0006	2	3	1	31
A 1	0006	2	3	2	27.8
A 1	0006	2	3	3	30.5
A 1	0006	2	3	4	30
A 1	0006	2	3	5	27
A 1	9732	1	3	1	8.3
A 1	9732	1	3	2	6.1
A 1	9732	1	3	3	6
A 1	9732	1	3	4	8.1
A 1	9732	1	3	5	7.5
A 1	9732	2	3	1	7.9
A 1	9732	2	3	2	8.5
A 1	9732	2	3	3	6.7
A 1	9732	2	3	4	8.9
A 1	9732	2	3	5	7.4
A 3	Bcin	1	3	1	4.7
A 3	Bcin	1	3	2	3.7
A 3	Bcin	1	3	3	4.2
A 3	Bcin	1	3	4	3.9
A 3	Bcin	1	3	5	4.5
A 3	Bcin	2	3	1	3.3
A 3	Bcin	2	3	2	2.6
A 3	Bcin	2	3	3	5.6
A 3	Bcin	2	3	4	3.9
A 3	Bcin	2	3	5	1.5
A 3	9401	1	3	1	19.5
A 3	9401	1	3	2	17.5
A 3	9401	1	3	3	19.8
A 3	9401	1	3	4	20
A 3	9401	1	3	5	16.9
A 3	9401	2	3	1	17.87
A 3	9401	2	3	2	15.8
A 3	9401	2	3	3	18.9
A 3	9401	2	3	4	18.9
A 3	9401	2	3	5	23.9
A 3	0006	1	3	1	21.9
A 3	0006	1	3	2	17.4
A 3	0006	1	3	3	18.4
A 3	0006	1	3	4	19.8
A 3	0006	1	3	5	18.8
A 3	0006	2	3	1	21.7
A 3	0006	2	3	2	20.1
A 3	0006	2	3	3	21.6
A 3	0006	2	3	4	21.9
A 3	0006	2	3	5	23.3
A 3	9732	1	3	1	6
A 3	9732	1	3	2	5.8
A 3	9732	1	3	3	3.8
A 3	9732	1	3	4	5.8
A 3	9732	1	3	5	8.5
A 3	9732	2	3	1	7.5
A 3	9732	2	3	2	6.7
A 3	9732	2	3	3	9
A 3	9732	2	3	4	9.5
A 3	9732	2	3	5	7.4
LA 3	Bcin	1	3	1	7.1
LA 3	Bcin	1	3	2	6.6
LA 3	Bcin	1	3	3	4
LA 3	Bcin	1	3	4	4.9
LA 3	Bcin	1	3	5	6.5
LA 3	Bcin	2	3	1	10.9
LA 3	Bcin	2	3	2	10.6
LA 3	Bcin	2	3	3	9.5
LA 3	Bcin	2	3	4	8.1
LA 3	Bcin	2	3	5	4.8
LA 3	9401	1	3	1	24
LA 3	9401	1	3	2	22.9
LA 3	9401	1	3	3	26.5
LA 3	9401	1	3	4	29
LA 3	9401	1	3	5	21
LA 3	9401	2	3	1	21
LA 3	9401	2	3	2	23
LA 3	9401	2	3	3	32.2
LA 3	9401	2	3	4	24.4
LA 3	9401	2	3	5	23.6
LA 3	0006	1	3	1	20.8
LA 3	0006	1	3	2	22
LA 3	0006	1	3	3	22
LA 3	0006	1	3	4	19
LA 3	0006	1	3	5	17
LA 3	0006	2	3	1	18
LA 3	0006	2	3	2	19.3
LA 3	0006	2	3	3	18.9
LA 3	0006	2	3	4	20.4
LA 3	0006	2	3	5	22
LA 3	9732	1	3	1	8.3
LA 3	9732	1	3	2	6.1
LA 3	9732	1	3	3	6.4
LA 3	9732	1	3	4	6.9
LA 3	9732	1	3	5	8.2
LA 3	9732	2	3	1	7.6
LA 3	9732	2	3	2	7.9
LA 3	9732	2	3	3	8.5
LA 3	9732	2	3	4	6.3
LA 3	9732	2	3	5	7.8
LA 1	Bcin	1	3	1	14.2
LA 1	Bcin	1	3	2	12.9
LA 1	Bcin	1	3	3	10.3
LA 1	Bcin	1	3	4	9.4
LA 1	Bcin	1	3	5	8.3
LA 1	Bcin	2	3	1	5
LA 1	Bcin	2	3	2	6.9
LA 1	Bcin	2	3	3	5.7
LA 1	Bcin	2	3	4	7.9
LA 1	Bcin	2	3	5	6.3
LA 1	9401	1	3	1	15.2
LA 1	9401	1	3	2	15.3
LA 1	9401	1	3	3	15
LA 1	9401	1	3	4	13.3
LA 1	9401	1	3	5	15.5
LA 1	9401	2	3	1	18.4
LA 1	9401	2	3	2	22.6
LA 1	9401	2	3	3	12
LA 1	9401	2	3	4	18.4
LA 1	9401	2	3	5	19.7
LA 1	0006	1	3	1	17
LA 1	0006	1	3	2	16
LA 1	0006	1	3	3	16
LA 1	0006	1	3	4	17.1
LA 1	0006	1	3	5	16.4
LA 1	0006	2	3	1	18.3
LA 1	0006	2	3	2	14.6
LA 1	0006	2	3	3	16.4
LA 1	0006	2	3	4	15
LA 1	0006	2	3	5	16.1
LA 1	9732	1	3	1	10.2
LA 1	9732	1	3	2	8.9
LA 1	9732	1	3	3	8.5
LA 1	9732	1	3	4	8.1
LA 1	9732	1	3	5	9.8
LA 1	9732	2	3	1	8.3
LA 1	9732	2	3	2	7.9
LA 1	9732	2	3	3	8.4
LA 1	9732	2	3	4	7.6
LA 1	9732	2	3	5	8.2
L 3	Bcin	1	3	1	5.4
L 3	Bcin	1	3	2	4.3
L 3	Bcin	1	3	3	4.6
L 3	Bcin	1	3	4	2.2
L 3	Bcin	1	3	5	3.1
L 3	Bcin	2	3	1	4
L 3	Bcin	2	3	2	1.2
L 3	Bcin	2	3	3	1.3
L 3	Bcin	2	3	4	4.7
L 3	Bcin	2	3	5	3.5
L 3	9401	1	3	1	11.5
L 3	9401	1	3	2	11.6
L 3	9401	1	3	3	12
L 3	9401	1	3	4	10.7
L 3	9401	1	3	5	11.5
L 3	9401	2	3	1	9.9
L 3	9401	2	3	2	10.4
L 3	9401	2	3	3	7.5
L 3	9401	2	3	4	8.1
L 3	9401	2	3	5	7
L 3	0006	1	3	1	9.1
L 3	0006	1	3	2	5.8
L 3	0006	1	3	3	7.5
L 3	0006	1	3	4	8.1
L 3	0006	1	3	5	7.6
L 3	0006	2	3	1	8.6
L 3	0006	2	3	2	7.8
L 3	0006	2	3	3	8.7
L 3	0006	2	3	4	9.1
L 3	0006	2	3	5	7.5
L 3	9732	1	3	1	3.6
L 3	9732	1	3	2	2.7
L 3	9732	1	3	3	3.5
L 3	9732	1	3	4	3.4
L 3	9732	1	3	5	2.9
L 3	9732	2	3	1	3.4
L 3	9732	2	3	2	2.9
L 3	9732	2	3	3	3.9
L 3	9732	2	3	4	4.1
L 3	9732	2	3	5	0
L 2	Bcin	1	3	1	1.7
L 2	Bcin	1	3	2	0.9
L 2	Bcin	1	3	3	1.5
L 2	Bcin	1	3	4	0
L 2	Bcin	1	3	5	0
L 2	Bcin	2	3	1	0
L 2	Bcin	2	3	2	4.1
L 2	Bcin	2	3	3	1
L 2	Bcin	2	3	4	2.8
L 2	Bcin	2	3	5	1.6
L 2	9401	1	3	1	12.49
L 2	9401	1	3	2	11.4
L 2	9401	1	3	3	10.3
L 2	9401	1	3	4	12.9
L 2	9401	1	3	5	10.3
L 2	9401	2	3	1	9.38
L 2	9401	2	3	2	10.7
L 2	9401	2	3	3	11.1
L 2	9401	2	3	4	9.7
L 2	9401	2	3	5	10.2
L 2	0006	1	3	1	14.6
L 2	0006	1	3	2	10.5
L 2	0006	1	3	3	12.2
L 2	0006	1	3	4	9.3
L 2	0006	1	3	5	12.7
L 2	0006	2	3	1	11.3
L 2	0006	2	3	2	10.4
L 2	0006	2	3	3	9
L 2	0006	2	3	4	11.2
L 2	0006	2	3	5	9.4
L 2	9732	1	3	1	3.7
L 2	9732	1	3	2	1.6
L 2	9732	1	3	3	1.6
L 2	9732	1	3	4	2.5
L 2	9732	1	3	5	2.6
L 2	9732	2	3	1	1.1
L 2	9732	2	3	2	3.1
L 2	9732	2	3	3	3.1
L 2	9732	2	3	4	0
L 2	9732	2	3	5	0
LO 1	Bcin	1	3	1	1
LO 1	Bcin	1	3	2	2.1
LO 1	Bcin	1	3	3	4.5
LO 1	Bcin	1	3	4	3.4
LO 1	Bcin	1	3	5	3
LO 1	Bcin	2	3	1	2
LO 1	Bcin	2	3	2	1.9
LO 1	Bcin	2	3	3	1.5
LO 1	Bcin	2	3	4	2.5
LO 1	Bcin	2	3	5	2.1
LO 1	9401	1	3	1	6.1
LO 1	9401	1	3	2	8.9
LO 1	9401	1	3	3	7.7
LO 1	9401	1	3	4	0
LO 1	9401	1	3	5	6.6
LO 1	9401	2	3	1	11.8
LO 1	9401	2	3	2	4.6
LO 1	9401	2	3	3	3.1
LO 1	9401	2	3	4	2.5
LO 1	9401	2	3	5	2.1
LO 1	0006	1	3	1	12.3
LO 1	0006	1	3	2	10.1
LO 1	0006	1	3	3	9.6
LO 1	0006	1	3	4	10.8
LO 1	0006	1	3	5	10.2
LO 1	0006	2	3	1	10.3
LO 1	0006	2	3	2	12.7
LO 1	0006	2	3	3	11.2
LO 1	0006	2	3	4	12.2
LO 1	0006	2	3	5	12.1
LO 1	9732	1	3	1	2.7
LO 1	9732	1	3	2	2.5
LO 1	9732	1	3	3	5
LO 1	9732	1	3	4	3.4
LO 1	9732	1	3	5	3.5
LO 1	9732	2	3	1	2.9
LO 1	9732	2	3	2	3.4
LO 1	9732	2	3	3	3
LO 1	9732	2	3	4	3.5
LO 1	9732	2	3	5	4.1
LO 2	Bcin	1	3	1	4.8
LO 2	Bcin	1	3	2	3.4
LO 2	Bcin	1	3	3	4.7
LO 2	Bcin	1	3	4	2.8
LO 2	Bcin	1	3	5	4.3
LO 2	Bcin	2	3	1	4.9
LO 2	Bcin	2	3	2	3.7
LO 2	Bcin	2	3	3	3.9
LO 2	Bcin	2	3	4	4.5
LO 2	Bcin	2	3	5	4.8
LO 2	9401	1	3	1	3.6
LO 2	9401	1	3	2	1.6
LO 2	9401	1	3	3	1.6
LO 2	9401	1	3	4	2.5
LO 2	9401	1	3	5	2.6
LO 2	9401	2	3	1	1
LO 2	9401	2	3	2	3.1
LO 2	9401	2	3	3	3.1
LO 2	9401	2	3	4	0
LO 2	9401	2	3	5	0
LO 2	0006	1	3	1	8.2
LO 2	0006	1	3	2	6.1
LO 2	0006	1	3	3	5.2
LO 2	0006	1	3	4	6.2
LO 2	0006	1	3	5	6
LO 2	0006	2	3	1	10.1
LO 2	0006	2	3	2	5.3
LO 2	0006	2	3	3	10.7
LO 2	0006	2	3	4	9.7
LO 2	0006	2	3	5	5.2
LO 2	9732	1	3	1	3.7
LO 2	9732	1	3	2	1.7
LO 2	9732	1	3	3	1.6
LO 2	9732	1	3	4	2.6
LO 2	9732	1	3	5	2.5
LO 2	9732	2	3	1	1
LO 2	9732	2	3	2	3.1
LO 2	9732	2	3	3	3.1
LO 2	9732	2	3	4	0
LO 2	9732	2	3	5	0
OT 3	Bcin	1	3	1	0
OT 3	Bcin	1	3	2	0
OT 3	Bcin	1	3	3	0
OT 3	Bcin	1	3	4	0
OT 3	Bcin	1	3	5	0
OT 3	Bcin	2	3	1	0
OT 3	Bcin	2	3	2	0
OT 3	Bcin	2	3	3	0
OT 3	Bcin	2	3	4	0
OT 3	Bcin	2	3	5	0
OT 3	9401	1	3	1	1.2
OT 3	9401	1	3	2	1.4
OT 3	9401	1	3	3	0
OT 3	9401	1	3	4	0
OT 3	9401	1	3	5	0
OT 3	9401	2	3	1	0.9
OT 3	9401	2	3	2	0
OT 3	9401	2	3	3	0
OT 3	9401	2	3	4	0
OT 3	9401	2	3	5	0
OT 3	0006	1	3	1	0
OT 3	0006	1	3	2	0
OT 3	0006	1	3	3	0
OT 3	0006	1	3	4	0
OT 3	0006	1	3	5	0
OT 3	0006	2	3	1	0
OT 3	0006	2	3	2	2.13
OT 3	0006	2	3	3	0
OT 3	0006	2	3	4	0
OT 3	0006	2	3	5	0
OT 3	9732	1	3	1	0
OT 3	9732	1	3	2	2.02
OT 3	9732	1	3	3	0
OT 3	9732	1	3	4	0
OT 3	9732	1	3	5	0
OT 3	9732	2	3	1	0
OT 3	9732	2	3	2	0
OT 3	9732	2	3	3	2.31
OT 3	9732	2	3	4	0
OT 3	9732	2	3	5	0
OT 2	Bcin	1	3	1	0
OT 2	Bcin	1	3	2	0
OT 2	Bcin	1	3	3	0
OT 2	Bcin	1	3	4	0
OT 2	Bcin	1	3	5	0
OT 2	Bcin	2	3	1	0
OT 2	Bcin	2	3	2	0
OT 2	Bcin	2	3	3	0
OT 2	Bcin	2	3	4	0
OT 2	Bcin	2	3	5	0
OT 2	9401	1	3	1	6.67
OT 2	9401	1	3	2	6.55
OT 2	9401	1	3	3	1.64
OT 2	9401	1	3	4	0
OT 2	9401	1	3	5	0
OT 2	9401	2	3	1	0
OT 2	9401	2	3	2	0
OT 2	9401	2	3	3	0
OT 2	9401	2	3	4	0
OT 2	9401	2	3	5	0
OT 2	0006	1	3	1	0
OT 2	0006	1	3	2	0
OT 2	0006	1	3	3	0
OT 2	0006	1	3	4	0
OT 2	0006	1	3	5	0
OT 2	0006	2	3	1	0
OT 2	0006	2	3	2	0
OT 2	0006	2	3	3	0
OT 2	0006	2	3	4	0
OT 2	0006	2	3	5	0
OT 2	9732	1	3	1	0
OT 2	9732	1	3	2	0
OT 2	9732	1	3	3	0
OT 2	9732	1	3	4	0
OT 2	9732	1	3	5	0
OT 2	9732	2	3	1	0
OT 2	9732	2	3	2	0
OT 2	9732	2	3	3	0
OT 2	9732	2	3	4	0
OT 2	9732	2	3	5	0
O 1	Bcin	1	3	1	2.1
O 1	Bcin	1	3	2	1.2
O 1	Bcin	1	3	3	1.3
O 1	Bcin	1	3	4	1.8
O 1	Bcin	1	3	5	3.1
O 1	Bcin	2	3	1	1.7
O 1	Bcin	2	3	2	4.9
O 1	Bcin	2	3	3	2.5
O 1	Bcin	2	3	4	2.8
O 1	Bcin	2	3	5	2.7
O 1	9401	1	3	1	4.35
O 1	9401	1	3	2	5.53
O 1	9401	1	3	3	0
O 1	9401	1	3	4	0
O 1	9401	1	3	5	0
O 1	9401	2	3	1	0
O 1	9401	2	3	2	0
O 1	9401	2	3	3	0
O 1	9401	2	3	4	0
O 1	9401	2	3	5	0
O 1	0006	1	3	1	10.58
O 1	0006	1	3	2	8.32
O 1	0006	1	3	3	8.05
O 1	0006	1	3	4	0
O 1	0006	1	3	5	0
O 1	0006	2	3	1	0
O 1	0006	2	3	2	0
O 1	0006	2	3	3	0
O 1	0006	2	3	4	0
O 1	0006	2	3	5	0
O 1	9732	1	3	1	2.25
O 1	9732	1	3	2	1.5
O 1	9732	1	3	3	0
O 1	9732	1	3	4	0
O 1	9732	1	3	5	0
O 1	9732	2	3	1	0
O 1	9732	2	3	2	0
O 1	9732	2	3	3	0
O 1	9732	2	3	4	0
O 1	9732	2	3	5	0
O3	Bcin	1	3	1	2.6
O3	Bcin	1	3	2	2.3
O3	Bcin	1	3	3	4.9
O3	Bcin	1	3	4	4.9
O3	Bcin	1	3	5	0
O3	Bcin	2	3	1	5
O3	Bcin	2	3	2	2.5
O3	Bcin	2	3	3	2.5
O3	Bcin	2	3	4	3
O3	Bcin	2	3	5	0
O3	9401	1	3	1	3.3
O3	9401	1	3	2	4.2
O3	9401	1	3	3	3.9
O3	9401	1	3	4	5.3
O3	9401	1	3	5	2.8
O3	9401	2	3	1	2.4
O3	9401	2	3	2	5.7
O3	9401	2	3	3	0
O3	9401	2	3	4	0
O3	9401	2	3	5	2.4
O3	0006	1	3	1	1.9
O3	0006	1	3	2	2.1
O3	0006	1	3	3	2.04
O3	0006	1	3	4	2.2
O3	0006	1	3	5	1.2
O3	0006	2	3	1	11.8
O3	0006	2	3	2	7.9
O3	0006	2	3	3	6.6
O3	0006	2	3	4	3.7
O3	0006	2	3	5	2.9
O3	9732	1	3	1	0.9
O3	9732	1	3	2	0.5
O3	9732	1	3	3	0
O3	9732	1	3	4	0
O3	9732	1	3	5	0
O3	9732	2	3	1	0
O3	9732	2	3	2	0
O3	9732	2	3	3	0
O3	9732	2	3	4	0
O3	9732	2	3	5	0

## Sheet: Leaves of Cut Lilies
section	be	leaves	dpi	spot	ls
A 1	Bcin	1	3	1	1.93
A 1	Bcin	1	3	2	0
A 1	Bcin	1	3	3	2.12
A 1	Bcin	1	3	4	0
A 1	Bcin	2	3	1	4.11
A 1	Bcin	2	3	2	0
A 1	Bcin	2	3	3	0
A 1	Bcin	2	3	4	0
A 1	Bcin	3	3	1	4.06
A 1	Bcin	3	3	2	4.35
A 1	Bcin	3	3	3	0
A 1	Bcin	3	3	4	2.04
A 1	9401	1	3	1	9.27
A 1	9401	1	3	2	9.47
A 1	9401	1	3	3	7.28
A 1	9401	1	3	4	7.05
A 1	9401	2	3	1	8.07
A 1	9401	2	3	2	14.23
A 1	9401	2	3	3	10.55
A 1	9401	2	3	4	11.52
A 1	9401	3	3	1	11.97
A 1	9401	3	3	2	11.76
A 1	9401	3	3	3	10.49
A 1	9401	3	3	4	10.32
A 1	0006	1	3	1	12.93
A 1	0006	1	3	2	12.05
A 1	0006	1	3	3	11.23
A 1	0006	1	3	4	10.71
A 1	0006	2	3	1	15.13
A 1	0006	2	3	2	13.2
A 1	0006	2	3	3	11.74
A 1	0006	2	3	4	10.35
A 1	0006	3	3	1	12.45
A 1	0006	3	3	2	10.59
A 1	0006	3	3	3	11.64
A 1	0006	3	3	4	11.53
A 1	9732	1	3	1	2.5
A 1	9732	1	3	2	5.83
A 1	9732	1	3	3	3.67
A 1	9732	1	3	4	5.23
A 1	9732	2	3	1	3.35
A 1	9732	2	3	2	4.46
A 1	9732	2	3	3	3.12
A 1	9732	2	3	4	2.91
A 1	9732	3	3	1	3.45
A 1	9732	3	3	2	2.76
A 1	9732	3	3	3	4.05
A 1	9732	3	3	4	3.73
A 3	Bcin	1	3	1	2.73
A 3	Bcin	1	3	2	2.5
A 3	Bcin	1	3	3	3.08
A 3	Bcin	1	3	4	2.27
A 3	Bcin	2	3	1	2.9
A 3	Bcin	2	3	2	2.89
A 3	Bcin	2	3	3	1.18
A 3	Bcin	2	3	4	2.43
A 3	Bcin	3	3	1	2.49
A 3	Bcin	3	3	2	3.4
A 3	Bcin	3	3	3	2.51
A 3	Bcin	3	3	4	3.61
A 3	9401	1	3	1	9.13
A 3	9401	1	3	2	10.18
A 3	9401	1	3	3	10.98
A 3	9401	1	3	4	11.78
A 3	9401	2	3	1	7.88
A 3	9401	2	3	2	8.21
A 3	9401	2	3	3	6.04
A 3	9401	2	3	4	7
A 3	9401	3	3	1	8.38
A 3	9401	3	3	2	9.61
A 3	9401	3	3	3	8.73
A 3	9401	3	3	4	10.18
A 3	0006	1	3	1	8.59
A 3	0006	1	3	2	8.9
A 3	0006	1	3	3	8.89
A 3	0006	1	3	4	8.38
A 3	0006	2	3	1	9.58
A 3	0006	2	3	2	10.3
A 3	0006	2	3	3	8.78
A 3	0006	2	3	4	10.17
A 3	0006	3	3	1	9.25
A 3	0006	3	3	2	9.92
A 3	0006	3	3	3	10.36
A 3	0006	3	3	4	9.78
A 3	9732	1	3	1	2.27
A 3	9732	1	3	2	2.6
A 3	9732	1	3	3	2.83
A 3	9732	1	3	4	2.2
A 3	9732	2	3	1	5.4
A 3	9732	2	3	2	4.37
A 3	9732	2	3	3	3.02
A 3	9732	2	3	4	2.32
A 3	9732	3	3	1	2.24
A 3	9732	3	3	2	4.25
A 3	9732	3	3	3	2.56
A 3	9732	3	3	4	2.35
LA 3	Bcin	1	3	1	3.41
LA 3	Bcin	1	3	2	2.56
LA 3	Bcin	1	3	3	3.66
LA 3	Bcin	1	3	4	0
LA 3	Bcin	2	3	1	2.96
LA 3	Bcin	2	3	2	3.34
LA 3	Bcin	2	3	3	0
LA 3	Bcin	2	3	4	2.37
LA 3	Bcin	3	3	1	0
LA 3	Bcin	3	3	2	0
LA 3	Bcin	3	3	3	2.73
LA 3	Bcin	3	3	4	0
LA 3	9401	1	3	1	5.74
LA 3	9401	1	3	2	6.89
LA 3	9401	1	3	3	6.27
LA 3	9401	1	3	4	6.28
LA 3	9401	2	3	1	5.44
LA 3	9401	2	3	2	4.78
LA 3	9401	2	3	3	4.35
LA 3	9401	2	3	4	4.54
LA 3	9401	3	3	1	5.95
LA 3	9401	3	3	2	8.24
LA 3	9401	3	3	3	6.71
LA 3	9401	3	3	4	4.9
LA 3	0006	1	3	1	5.65
LA 3	0006	1	3	2	5.2
LA 3	0006	1	3	3	6.02
LA 3	0006	1	3	4	6.8
LA 3	0006	2	3	1	6.69
LA 3	0006	2	3	2	6.48
LA 3	0006	2	3	3	5.99
LA 3	0006	2	3	4	6.72
LA 3	0006	3	3	1	6.43
LA 3	0006	3	3	2	6.63
LA 3	0006	3	3	3	6.18
LA 3	0006	3	3	4	6.51
LA 3	9732	1	3	1	2.7
LA 3	9732	1	3	2	3.69
LA 3	9732	1	3	3	3.33
LA 3	9732	1	3	4	3.47
LA 3	9732	2	3	1	2.18
LA 3	9732	2	3	2	2.28
LA 3	9732	2	3	3	3.15
LA 3	9732	2	3	4	3.51
LA 3	9732	3	3	1	3.27
LA 3	9732	3	3	2	2.6
LA 3	9732	3	3	3	3.34
LA 3	9732	3	3	4	2.74
LA 1	Bcin	1	3	1	1.72
LA 1	Bcin	1	3	2	20.4
LA 1	Bcin	1	3	3	0
LA 1	Bcin	1	3	4	1.05
LA 1	Bcin	2	3	1	1.65
LA 1	Bcin	2	3	2	1.91
LA 1	Bcin	2	3	3	0
LA 1	Bcin	2	3	4	0
LA 1	Bcin	3	3	1	0
LA 1	Bcin	3	3	2	1.3
LA 1	Bcin	3	3	3	0
LA 1	Bcin	3	3	4	1.86
LA 1	9401	1	3	1	4.74
LA 1	9401	1	3	2	4.02
LA 1	9401	1	3	3	4.98
LA 1	9401	1	3	4	4.55
LA 1	9401	2	3	1	4.22
LA 1	9401	2	3	2	4.39
LA 1	9401	2	3	3	4.24
LA 1	9401	2	3	4	3.6
LA 1	9401	3	3	1	2.65
LA 1	9401	3	3	2	2.77
LA 1	9401	3	3	3	3.65
LA 1	9401	3	3	4	3.23
LA 1	0006	1	3	1	2.46
LA 1	0006	1	3	2	3.44
LA 1	0006	1	3	3	5.07
LA 1	0006	1	3	4	3.38
LA 1	0006	2	3	1	7.18
LA 1	0006	2	3	2	5.66
LA 1	0006	2	3	3	6.35
LA 1	0006	2	3	4	4.7
LA 1	0006	3	3	1	6.53
LA 1	0006	3	3	2	6.37
LA 1	0006	3	3	3	7.46
LA 1	0006	3	3	4	6.18
LA 1	9732	1	3	1	2.21
LA 1	9732	1	3	2	2.22
LA 1	9732	1	3	3	2.3
LA 1	9732	1	3	4	2.23
LA 1	9732	2	3	1	2.03
LA 1	9732	2	3	2	1.28
LA 1	9732	2	3	3	1.7
LA 1	9732	2	3	4	2.38
LA 1	9732	3	3	1	2.31
LA 1	9732	3	3	2	2.05
LA 1	9732	3	3	3	2.02
LA 1	9732	3	3	4	0
L 2	Bcin	1	3	1	0.8
L 2	Bcin	1	3	2	0
L 2	Bcin	1	3	3	0
L 2	Bcin	1	3	4	0
L 2	Bcin	2	3	1	0
L 2	Bcin	2	3	2	0
L 2	Bcin	2	3	3	0
L 2	Bcin	2	3	4	0
L 2	Bcin	3	3	1	0
L 2	Bcin	3	3	2	0
L 2	Bcin	3	3	3	0
L 2	Bcin	3	3	4	0
L 2	9401	1	3	1	3.55
L 2	9401	1	3	2	3.05
L 2	9401	1	3	3	2.75
L 2	9401	1	3	4	1.4
L 2	9401	2	3	1	2.02
L 2	9401	2	3	2	1.3
L 2	9401	2	3	3	2.47
L 2	9401	2	3	4	1.56
L 2	9401	3	3	1	3.52
L 2	9401	3	3	2	2.81
L 2	9401	3	3	3	2.38
L 2	9401	3	3	4	2.94
L 2	0006	1	3	1	3.05
L 2	0006	1	3	2	2.85
L 2	0006	1	3	3	3.34
L 2	0006	1	3	4	3
L 2	0006	2	3	1	2.22
L 2	0006	2	3	2	2.31
L 2	0006	2	3	3	2.58
L 2	0006	2	3	4	2.33
L 2	0006	3	3	1	2.98
L 2	0006	3	3	2	2.53
L 2	0006	3	3	3	2.59
L 2	0006	3	3	4	3.16
L 2	9732	1	3	1	1.8
L 2	9732	1	3	2	1.4
L 2	9732	1	3	3	0.9
L 2	9732	1	3	4	0
L 2	9732	2	3	1	0.9
L 2	9732	2	3	2	0.8
L 2	9732	2	3	3	0
L 2	9732	2	3	4	0
L 2	9732	3	3	1	1.9
L 2	9732	3	3	2	1.2
L 2	9732	3	3	3	1.8
L 2	9732	3	3	4	1.48
L 3	Bcin	1	3	1	0
L 3	Bcin	1	3	2	0
L 3	Bcin	1	3	3	0
L 3	Bcin	1	3	4	0
L 3	Bcin	2	3	1	0
L 3	Bcin	2	3	2	0
L 3	Bcin	2	3	3	0
L 3	Bcin	2	3	4	0
L 3	Bcin	3	3	1	0
L 3	Bcin	3	3	2	0
L 3	Bcin	3	3	3	0
L 3	Bcin	3	3	4	0
L 3	9401	1	3	1	3.57
L 3	9401	1	3	2	2.21
L 3	9401	1	3	3	2.57
L 3	9401	1	3	4	2.34
L 3	9401	2	3	1	2.35
L 3	9401	2	3	2	2.58
L 3	9401	2	3	3	2.73
L 3	9401	2	3	4	2.17
L 3	9401	3	3	1	4.47
L 3	9401	3	3	2	3.57
L 3	9401	3	3	3	3.88
L 3	9401	3	3	4	3.3
L 3	0006	1	3	1	3.23
L 3	0006	1	3	2	3
L 3	0006	1	3	3	2.12
L 3	0006	1	3	4	3.66
L 3	0006	2	3	1	2.94
L 3	0006	2	3	2	1.95
L 3	0006	2	3	3	2.64
L 3	0006	2	3	4	2.8
L 3	0006	3	3	1	2.21
L 3	0006	3	3	2	2.81
L 3	0006	3	3	3	3.29
L 3	0006	3	3	4	3.44
L 3	9732	1	3	1	0.8
L 3	9732	1	3	2	0
L 3	9732	1	3	3	0
L 3	9732	1	3	4	0
L 3	9732	2	3	1	0.9
L 3	9732	2	3	2	0
L 3	9732	2	3	3	0.8
L 3	9732	2	3	4	0
L 3	9732	3	3	1	0.7
L 3	9732	3	3	2	0.7
L 3	9732	3	3	3	0
L 3	9732	3	3	4	0
LO 1	Bcin	1	3	1	0
LO 1	Bcin	1	3	2	0
LO 1	Bcin	1	3	3	0
LO 1	Bcin	1	3	4	0
LO 1	Bcin	2	3	1	0
LO 1	Bcin	2	3	2	0
LO 1	Bcin	2	3	3	0
LO 1	Bcin	2	3	4	0
LO 1	Bcin	3	3	1	0
LO 1	Bcin	3	3	2	0
LO 1	Bcin	3	3	3	0
LO 1	Bcin	3	3	4	0
LO 1	9401	1	3	1	3.37
LO 1	9401	1	3	2	2.92
LO 1	9401	1	3	3	6.9
LO 1	9401	1	3	4	3.13
LO 1	9401	2	3	1	3.51
LO 1	9401	2	3	2	4.06
LO 1	9401	2	3	3	2.57
LO 1	9401	2	3	4	3.58
LO 1	9401	3	3	1	3.59
LO 1	9401	3	3	2	0
LO 1	9401	3	3	3	2.25
LO 1	9401	3	3	4	2.97
LO 1	0006	1	3	1	4.56
LO 1	0006	1	3	2	2.64
LO 1	0006	1	3	3	2.85
LO 1	0006	1	3	4	3.73
LO 1	0006	2	3	1	3.1
LO 1	0006	2	3	2	3.65
LO 1	0006	2	3	3	4.21
LO 1	0006	2	3	4	3.77
LO 1	0006	3	3	1	1.41
LO 1	0006	3	3	2	2.34
LO 1	0006	3	3	3	1.32
LO 1	0006	3	3	4	1.26
LO 1	9732	1	3	1	0.8
LO 1	9732	1	3	2	0
LO 1	9732	1	3	3	0.9
LO 1	9732	1	3	4	0
LO 1	9732	2	3	1	0.8
LO 1	9732	2	3	2	0
LO 1	9732	2	3	3	0
LO 1	9732	2	3	4	0.9
LO 1	9732	3	3	1	1
LO 1	9732	3	3	2	0
LO 1	9732	3	3	3	0
LO 1	9732	3	3	4	0.8
LO 2	Bcin	1	3	1	0
LO 2	Bcin	1	3	2	0
LO 2	Bcin	1	3	3	1.67
LO 2	Bcin	1	3	4	0
LO 2	Bcin	2	3	1	0
LO 2	Bcin	2	3	2	0
LO 2	Bcin	2	3	3	0
LO 2	Bcin	2	3	4	2.79
LO 2	Bcin	3	3	1	0
LO 2	Bcin	3	3	2	0
LO 2	Bcin	3	3	3	3.06
LO 2	Bcin	3	3	4	0
LO 2	9401	1	3	1	3.62
LO 2	9401	1	3	2	3.97
LO 2	9401	1	3	3	3.03
LO 2	9401	1	3	4	4
LO 2	9401	2	3	1	4.12
LO 2	9401	2	3	2	4.38
LO 2	9401	2	3	3	3.33
LO 2	9401	2	3	4	2.54
LO 2	9401	3	3	1	2.36
LO 2	9401	3	3	2	4.18
LO 2	9401	3	3	3	3.11
LO 2	9401	3	3	4	2.65
LO 2	0006	1	3	1	4.69
LO 2	0006	1	3	2	4.19
LO 2	0006	1	3	3	3.58
LO 2	0006	1	3	4	4.3
LO 2	0006	2	3	1	4.62
LO 2	0006	2	3	2	3.92
LO 2	0006	2	3	3	4.23
LO 2	0006	2	3	4	4.6
LO 2	0006	3	3	1	4.14
LO 2	0006	3	3	2	5.02
LO 2	0006	3	3	3	4.54
LO 2	0006	3	3	4	4.97
LO 2	9732	1	3	1	2.65
LO 2	9732	1	3	2	2.64
LO 2	9732	1	3	3	0
LO 2	9732	1	3	4	3.21
LO 2	9732	2	3	1	1.64
LO 2	9732	2	3	2	2.2
LO 2	9732	2	3	3	2.7
LO 2	9732	2	3	4	0
LO 2	9732	3	3	1	1.7
LO 2	9732	3	3	2	1.73
LO 2	9732	3	3	3	1.24
LO 2	9732	3	3	4	2.35
OT 3	Bcin	1	3	1	0
OT 3	Bcin	1	3	2	0
OT 3	Bcin	1	3	3	0
OT 3	Bcin	1	3	4	0
OT 3	Bcin	2	3	1	0
OT 3	Bcin	2	3	2	0
OT 3	Bcin	2	3	3	0
OT 3	Bcin	2	3	4	0
OT 3	Bcin	3	3	1	0
OT 3	Bcin	3	3	2	0
OT 3	Bcin	3	3	3	0
OT 3	Bcin	3	3	4	0
OT 3	9401	1	3	1	3.04
OT 3	9401	1	3	2	2.6
OT 3	9401	1	3	3	2.3
OT 3	9401	1	3	4	2.81
OT 3	9401	2	3	1	3.39
OT 3	9401	2	3	2	2.72
OT 3	9401	2	3	3	2
OT 3	9401	2	3	4	2.25
OT 3	9401	3	3	1	2.39
OT 3	9401	3	3	2	3.27
OT 3	9401	3	3	3	2.47
OT 3	9401	3	3	4	1.22
OT 3	0006	1	3	1	3.57
OT 3	0006	1	3	2	2.92
OT 3	0006	1	3	3	4.38
OT 3	0006	1	3	4	5.32
OT 3	0006	2	3	1	3.54
OT 3	0006	2	3	2	3.9
OT 3	0006	2	3	3	3.29
OT 3	0006	2	3	4	3.85
OT 3	0006	3	3	1	3.51
OT 3	0006	3	3	2	2.82
OT 3	0006	3	3	3	2.61
OT 3	0006	3	3	4	1.7
OT 3	9732	1	3	1	1.72
OT 3	9732	1	3	2	1.49
OT 3	9732	1	3	3	1.6
OT 3	9732	1	3	4	1.32
OT 3	9732	2	3	1	1.84
OT 3	9732	2	3	2	1.63
OT 3	9732	2	3	3	1.58
OT 3	9732	2	3	4	1.95
OT 3	9732	3	3	1	1.61
OT 3	9732	3	3	2	2.21
OT 3	9732	3	3	3	1.55
OT 3	9732	3	3	4	1.94
OT 2	Bcin	1	3	1	0
OT 2	Bcin	1	3	2	0
OT 2	Bcin	1	3	3	0
OT 2	Bcin	1	3	4	0
OT 2	Bcin	2	3	1	0
OT 2	Bcin	2	3	2	0
OT 2	Bcin	2	3	3	0
OT 2	Bcin	2	3	4	0
OT 2	Bcin	3	3	1	0
OT 2	Bcin	3	3	2	0
OT 2	Bcin	3	3	3	0
OT 2	Bcin	3	3	4	0
OT 2	9401	1	3	1	2.79
OT 2	9401	1	3	2	2.64
OT 2	9401	1	3	3	2.04
OT 2	9401	1	3	4	2.96
OT 2	9401	2	3	1	2.3
OT 2	9401	2	3	2	2.99
OT 2	9401	2	3	3	3.23
OT 2	9401	2	3	4	4.12
OT 2	9401	3	3	1	4.27
OT 2	9401	3	3	2	3.59
OT 2	9401	3	3	3	4.76
OT 2	9401	3	3	4	4.93
OT 2	0006	1	3	1	3.69
OT 2	0006	1	3	2	3.54
OT 2	0006	1	3	3	3.74
OT 2	0006	1	3	4	4.19
OT 2	0006	2	3	1	4.16
OT 2	0006	2	3	2	3.5
OT 2	0006	2	3	3	3.3
OT 2	0006	2	3	4	3.9
OT 2	0006	3	3	1	3.79
OT 2	0006	3	3	2	3.11
OT 2	0006	3	3	3	2.69
OT 2	0006	3	3	4	2.97
OT 2	9732	1	3	1	2.55
OT 2	9732	1	3	2	1.69
OT 2	9732	1	3	3	1.72
OT 2	9732	1	3	4	2.55
OT 2	9732	2	3	1	2.26
OT 2	9732	2	3	2	1.95
OT 2	9732	2	3	3	0
OT 2	9732	2	3	4	0
OT 2	9732	3	3	1	0.9
OT 2	9732	3	3	2	0.8
OT 2	9732	3	3	3	0.8
OT 2	9732	3	3	4	0
O 1	Bcin	1	3	1	1.6
O 1	Bcin	1	3	2	0.5
O 1	Bcin	1	3	3	0
O 1	Bcin	1	3	4	0
O 1	Bcin	2	3	1	0
O 1	Bcin	2	3	2	0
O 1	Bcin	2	3	3	0
O 1	Bcin	2	3	4	0
O 1	Bcin	3	3	1	0
O 1	Bcin	3	3	2	0
O 1	Bcin	3	3	3	0
O 1	Bcin	3	3	4	0
O 1	9401	1	3	1	0
O 1	9401	1	3	2	1.26
O 1	9401	1	3	3	2.46
O 1	9401	1	3	4	0
O 1	9401	2	3	1	0
O 1	9401	2	3	2	1.5
O 1	9401	2	3	3	0
O 1	9401	2	3	4	0
O 1	9401	3	3	1	1.28
O 1	9401	3	3	2	1.56
O 1	9401	3	3	3	0
O 1	9401	3	3	4	1.73
O 1	0006	1	3	1	3
O 1	0006	1	3	2	3.47
O 1	0006	1	3	3	3.29
O 1	0006	1	3	4	2.43
O 1	0006	2	3	1	2.15
O 1	0006	2	3	2	1.91
O 1	0006	2	3	3	2.64
O 1	0006	2	3	4	2.42
O 1	0006	3	3	1	2.57
O 1	0006	3	3	2	2.8
O 1	0006	3	3	3	2.58
O 1	0006	3	3	4	1.98
O 1	9732	1	3	1	0
O 1	9732	1	3	2	0
O 1	9732	1	3	3	0.7
O 1	9732	1	3	4	0.8
O 1	9732	2	3	1	0
O 1	9732	2	3	2	0
O 1	9732	2	3	3	0
O 1	9732	2	3	4	0
O 1	9732	3	3	1	0
O 1	9732	3	3	2	0
O 1	9732	3	3	3	0
O 1	9732	3	3	4	0
O3	Bcin	1	3	1	0
O3	Bcin	1	3	2	0
O3	Bcin	1	3	3	0
O3	Bcin	1	3	4	0
O3	Bcin	2	3	1	0
O3	Bcin	2	3	2	0
O3	Bcin	2	3	3	0
O3	Bcin	2	3	4	0
O3	Bcin	3	3	1	0
O3	Bcin	3	3	2	0
O3	Bcin	3	3	3	0
O3	Bcin	3	3	4	0
O3	9401	1	3	1	1.5
O3	9401	1	3	2	1.42
O3	9401	1	3	3	1.89
O3	9401	1	3	4	1.31
O3	9401	2	3	1	1.38
O3	9401	2	3	2	1.28
O3	9401	2	3	3	1.85
O3	9401	2	3	4	1.56
O3	9401	3	3	1	1.51
O3	9401	3	3	2	0.9
O3	9401	3	3	3	1.3
O3	9401	3	3	4	1.84
O3	0006	1	3	1	3.55
O3	0006	1	3	2	2.16
O3	0006	1	3	3	1.35
O3	0006	1	3	4	2.25
O3	0006	2	3	1	1.54
O3	0006	2	3	2	2.13
O3	0006	2	3	3	2.27
O3	0006	2	3	4	1.13
O3	0006	3	3	1	1.96
O3	0006	3	3	2	1.62
O3	0006	3	3	3	1.97
O3	0006	3	3	4	1.67
O3	9732	1	3	1	0
O3	9732	1	3	2	0
O3	9732	1	3	3	0
O3	9732	1	3	4	0
O3	9732	2	3	1	0
O3	9732	2	3	2	0
O3	9732	2	3	3	0
O3	9732	2	3	4	0
O3	9732	3	3	1	0
O3	9732	3	3	2	0
O3	9732	3	3	3	0
O3	9732	3	3	4	0
